# Supplementary material for: Mechanical insulation of aza-Pechmann dyes within [2]rotaxanes
Source: Royal Society of Chemistry journal article supplement (doi:10.1039/d4sc03657c), 2024-01-01
Supplement: d4sc03657c1.pdf [file d4sc03657c1.pdf]

## Supporting Information

### Mechanical Insulation of Aza-Pechmann Dyes within [2]Rotaxanes

Guillermo Cutillas-Font,<sup>[a]</sup> Aurelia Pastor,<sup>\*[a]</sup> Mateo Alajarin,<sup>[a]</sup> Alberto Martínez-Cuezva,<sup>[a]</sup> Marta Marin-Luna,<sup>[a]</sup> Belen Batanero<sup>[b]</sup> and Jose Berna<sup>\*[a]</sup>

<sup>[a]</sup> Department of Organic Chemistry, Faculty of Chemistry. University of Murcia. Regional Campus of International Excellence "Campus Mare Nostrum", 30100 Murcia, Spain.

<sup>[b]</sup> Department of Organic Chemistry and Inorganic Chemistry and Institute of Chemical Research Andrés M. del Río, 28805 Alcalá de Henares, Madrid, Spain

E-mail: aureliap@um.es, ppberna@um.es

## Table of Contents

|                                                                                                                                                                                           |            |
|-------------------------------------------------------------------------------------------------------------------------------------------------------------------------------------------|------------|
| <b>1. General information</b>                                                                                                                                                             | <b>S2</b>  |
| <b>2. Synthesis and experimental data of aza-Pechmann dyes 2a-d</b>                                                                                                                       | <b>S3</b>  |
| <b>3. Synthesis and experimental data of [2]rotaxanes 3a-i</b>                                                                                                                            | <b>S7</b>  |
| <b>4. ESI-HRMS of compounds 2a-d, 3a-c,e-i, 4 and 5</b>                                                                                                                                   | <b>S16</b> |
| <b>5. Crystal data and structure refinement for rotaxanes 3b and 3c</b>                                                                                                                   | <b>S23</b> |
| <b>6. Determination of <math>\Delta G^\ddagger</math> for the pirouetting of the macrocycle in 3a and 3c</b>                                                                              | <b>S28</b> |
| <b>7. Thermolysis of aza-Pechmann dyes 2b-c and rotaxanes 3b-c</b>                                                                                                                        | <b>S33</b> |
| <b>8. TGA experiments of Pechmann lactams 2b-c and rotaxanes 3b-c</b>                                                                                                                     | <b>S38</b> |
| <b>9. UV-visible spectra of aza-Pechmann dyes 2 and rotaxanes 3</b>                                                                                                                       | <b>S40</b> |
| <b>10. Computational study</b>                                                                                                                                                            | <b>S49</b> |
| <b>11. Electrochemical analysis of aza-Pechmann dyes 2b-c and rotaxanes 3b-c,f-i</b>                                                                                                      | <b>S58</b> |
| <b>12. <math>^1\text{H}</math> and <math>^{13}\text{C}</math> NMR spectra of all new synthesized compounds (HMBC, HSQC, COSY, NOESY and DOSY of selected compounds are also included)</b> | <b>S68</b> |
| <b>13. References</b>                                                                                                                                                                     | <b>S96</b> |

## 1. General information

HPLC grade solvents (Scharlab) were nitrogen saturated, dried and deoxygenated by using an Innovative Technology Inc. Pure-Solv 400 Solvent Purification System. Column chromatography was carried out by using silica gel (60 Å, 70-200 µm, SDS) as stationary phase, and TLC was performed on precoated silica gel on aluminum cards (0.25 mm thick, with fluorescent indicator 254 nm) and observed under UV light. All melting points were determined on a Kofler hot-plate melting point apparatus and are uncorrected.

<sup>1</sup>H- and <sup>13</sup>C-NMR spectra were recorded on a Bruker Avance 400 or 600 MHz instruments. <sup>1</sup>H NMR chemical shifts are reported relative to Me<sub>4</sub>Si and were referenced via residual proton resonances of the corresponding deuterated solvent whereas <sup>13</sup>C NMR spectra are reported relative to Me<sub>4</sub>Si by using the carbon signals of the deuterated solvent. Signals in the <sup>1</sup>H and <sup>13</sup>C NMR spectra of the synthesized compounds were assigned with the aid of DEPT-135, COSY, NOESY, HSQC or HMBC experiments whenever was necessary. Abbreviations of coupling patterns are as follows: br, broad; s, singlet; d, doublet; t, triplet; q, quadruplet; m, multiplet.

NMR diffusion measurements were performed on a 600 MHz Bruker AVANCE spectrometer. The values reported are the average of three different measurements ( $\Delta = 50, 150$  and  $400$  ms), which yielded *D*-values within max.  $\pm 2.0\%$  of the reported one. All the measurements were carried out using the <sup>1</sup>H resonances. The gradient length was set in the range of 1.3 and 3.7 ms. For all the experiments the number of scans was 32 and the experimental time was ca. 90 min. All the observed data leading to the reported *D*-values afforded lines whose correlation coefficients were above 0.9999.

The hydrodynamic radius ( $r_H$ ) was calculated from the *D* value by using the Stokes–Einstein equation. The Stokes–Einstein equation:  $D = (k_B T) / (6\pi\eta r_H)$ , where *D* = diffusion coefficient,  $k_B$  = Boltzman constant, *T* = temperature in degrees Kelvin,  $\eta$  = viscosity of CDCl<sub>3</sub> at 273 K,<sup>1</sup> and  $r_H$  = hydrodynamic radius (the radius of a hypothetical sphere that diffuses with the same speed as the particle under examination).<sup>2</sup>

NMR line shape analysis was performed with the iNMR 6.3.3 software.

High-resolution mass spectra (HRMS) were obtained using a time-of-flight (TOF) instrument equipped with electrospray ionization (ESI). IR spectra were recorded on a Jasco FT/IR-4700 or Perkin Elmer Spectrum 65 FT-IR spectrometers with an ATR unit. UV-Vis spectra were recorded on a Perkin Elmer Lambda 35 UV/Vis spectrophotometer.

## 2. Synthesis and experimental data of aza-Pechmann dyes 2a-d

The synthesis of aza-Pechmann derived lactams **2** was carried out from the previously described carboxylic acids **6**<sup>3, 4</sup> following two alternative procedures. **Procedure A** (synthesis of **2b** and **2d**) consists of two steps. First, carboxylic acid **6b** was reacted with copper(I) chloride and ammonium chloride in acetic anhydride under reflux to give Pechmann dye **1b**. After purification by column chromatography, dilactone **1b** was treated with dodecylamine or ethylamine in acetic acid under reflux to give dilactams **2b** or **2d**. Alternatively, dilactams **2a** and **2c** were obtained by **Procedure B**. In this case, dilactones **1a** or **1b** were used without further purification in the next step, and further reacted with dodecylamine or butylamine.

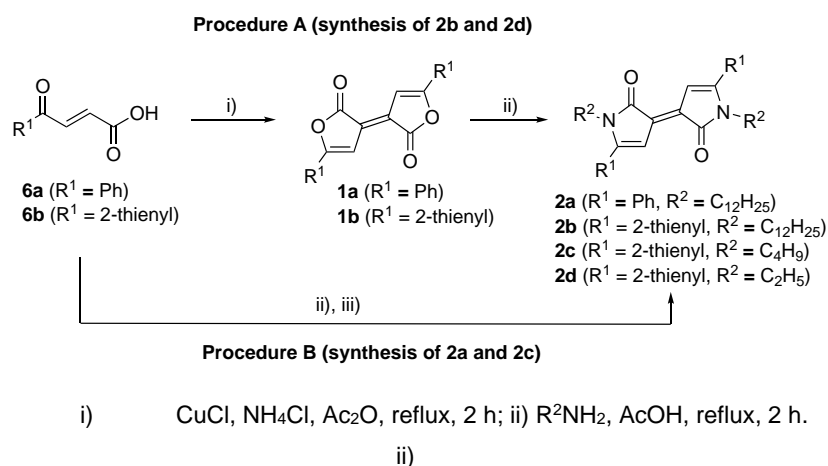

**Scheme S1.** Threads **2a-d** were prepared from the corresponding carboxylic acids **6a,b** following **procedures A or B**.

### Synthesis of 6a,b

The synthesis of (*E*)-4-oxo-4-phenylbut-2-enoic and (*E*)-4-oxo-4-(thiophen-2-yl)but-2-enoic acids **6a,b** is very well-documented by the Friedel-Crafts acylation of benzene and thiophene with maleic anhydride.<sup>3, 4</sup>

## Synthesis of aza-Pechman dyes 2a-d

### Aza-Pechmann dye 2a

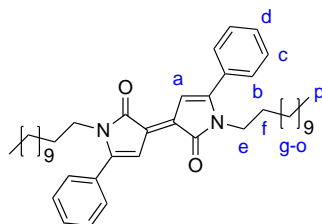

To a mixture of carboxylic acid **6a** (10.0 g, 56.8 mmol), CuCl (2.0 g, 20.2 mmol) and NH<sub>4</sub>Cl (2.2 g, 41.1 mmol), under a nitrogen-gas atmosphere, acetic anhydride was added (50 mL). The reaction was stirred for 2 hours under reflux. After cooling, the reaction mixture was filtered, washed with water (200 mL), ethanol (50 mL), and ether (50 mL) to obtain 6.2 g of crude product. The crude product was used without further purification in the next step.

Acetic acid (19 mL) was added to a mixture of dodecylamine (2.3 g, 12.4 mmol) and 1.0 g of crude product (obtained in the previous step) and stirred under reflux for 2 h. After removal of the solvent under reduced pressure, CH<sub>2</sub>Cl<sub>2</sub> (200 mL) was added and the resulting suspension was filtered through a Celite pad and subsequently washed with water (200 mL), a saturated aqueous solution of NaHCO<sub>3</sub> (200 mL) and brine (200 mL). It was then dried with anhydrous MgSO<sub>4</sub>. The solvent was removed under reduced pressure, and the crude product purified by silica-gel column chromatography eluting with 2:1 CHCl<sub>3</sub>/hexane as eluent, to give **2a** (0.70 g; 23%); m.p. 107-109 °C (violet prisms); IR (solid, ATR, cm<sup>-1</sup>)  $\nu$  = 2913 (s), 2849 (s), 1677 (vs, CO), 1471 (m), 1253 (m), 1141 (m), 760 (s), 747 (s), 701 (s); <sup>1</sup>H NMR (400 MHz, CDCl<sub>3</sub>, 298 K)  $\delta$  7.52 – 7.44 (m, 10H, H<sub>Ar</sub>), 6.89 (s, 2H, H<sub>a</sub>), 3.69-3.65 (m, 4H, H<sub>e</sub>), 1.47 – 1.40 (m, 4H, H<sub>f</sub>), 1.31 – 1.15 (m, 36H, H<sub>g-o</sub>), 0.87 (t, *J* = 6.9 Hz, 6H, H<sub>p</sub>); <sup>13</sup>C RMN (100 MHz, CDCl<sub>3</sub>, 298 K) 171.5 (CO), 152.9 (C), 131.6 (C), 129.9 (CH), 129.2 (C), 128.9 (CH), 127.7 (CH), 103.3 (CH), 41.1 (CH<sub>2</sub>), 32.1 (CH<sub>2</sub>), 29.8 (CH<sub>2</sub>), 29.7 (CH<sub>2</sub>), 29.53 (CH<sub>2</sub>), 29.48 (CH<sub>2</sub>), 29.2 (CH<sub>2</sub>), 26.7 (CH<sub>2</sub>), 22.8 (CH<sub>2</sub>), 14.3 (CH<sub>3</sub>); HRMS (ESI) calcd for C<sub>44</sub>H<sub>63</sub>N<sub>2</sub>O<sub>2</sub> [M + H]<sup>+</sup> 651.4884, found 651.4894.

## Aza-Pechmann dye 2b

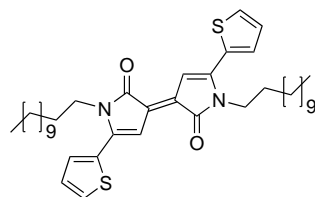

Compound **2b** was synthesized according to **procedure A**. A solution of dilactone **1b**<sup>5</sup> (1.09 g, 3.32 mmol) and *n*-dodecylamine (2.46 g, 13.27 mmol) in AcOH (20 mL) was stirred under reflux for 2 h. Subsequently, the excess of acetic acid was removed under reduced pressure. The resulting residue was redissolved in 200 mL of CH<sub>2</sub>Cl<sub>2</sub> and sequentially washed with H<sub>2</sub>O (200 mL), a saturated aqueous solution of NaHCO<sub>3</sub> (200 mL) and brine (200 mL). Finally, the crude product was purified by silica-gel column chromatography eluting with 3:1 CHCl<sub>3</sub>/hexane, yielding the violet-coloured product **2b** (1.87 g; 85%). The product exhibited identical spectroscopic data to those reported.<sup>5</sup>

## Aza-Pechmann dye 2c

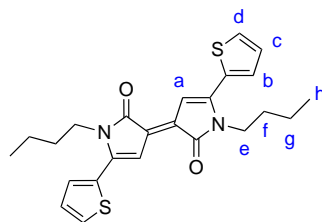

To a mixture of carboxylic acid **6b** (16.7 g, 91.7 mmol), CuCl (3.3 g, 33.3 mmol) and NH<sub>4</sub>Cl (3.6 g, 67.3 mmol) under a nitrogen-gas atmosphere, acetic anhydride was added (85 mL). The reaction was stirred for 2 hours under reflux. After cooling, the reaction mixture was filtered, washed with water (200 mL), ethanol (50 mL), and ether (50 mL) to obtain 12.91 g of crude product. The crude product was used without further purification in the next step.

Acetic acid (220 mL) was added to a mixture of butylamine (9.7 g, 132.9 mmol, 13.1 mL) and 10.91 g of crude product (obtained from the previous step) and stirred under reflux for 2 h. After removal of the solvent under reduced pressure, CH<sub>2</sub>Cl<sub>2</sub> (500 mL) was added and the resulting suspension was filtered through a Celite pad and subsequently washed with water (400 mL), a saturated aqueous solution of NaHCO<sub>3</sub> (400 mL), and brine (400 mL). It was then dried with anhydrous MgSO<sub>4</sub>. The solvent was removed under reduced pressure, and the crude product purified by silica-gel column chromatography eluting with 10:1 CHCl<sub>3</sub>/hexane, to give **2c** (1.16 g; 7%) m.p. 162-165 °C (violet prisms); IR (solid, ATR, cm<sup>-1</sup>)  $\nu$  = 2927 (w), 1667 (s, CO), 1489 (m), 1444 (m), 1270 (m), 1135 (m),

791 (s), 703 (s), 693 (s);  $^1\text{H}$  NMR (400 MHz,  $\text{CDCl}_3$ , 298 K)  $\delta$  7.47 (dd,  $J = 5.1, 1.0$  Hz, 2H,  $\text{H}_d$ ), 7.43 (dd,  $J = 3.8, 1.0$  Hz, 2H,  $\text{H}_b$ ), 7.14 (dd,  $J = 5.1, 3.8$  Hz, 2H,  $\text{H}_c$ ), 7.09 (s, 2H,  $\text{H}_a$ ), 3.89-3.85 (m, 4H,  $\text{H}_e$ ), 1.63 – 1.56 (m, 4H,  $\text{H}_f$ ), 1.39-1.30 (m, 4H,  $\text{H}_g$ ), 0.91 (t,  $J = 7.4$  Hz, 6H,  $\text{H}_h$ );  $^{13}\text{C}$  RMN (100 MHz,  $\text{CDCl}_3$ , 298 K)  $\delta$  170.9 (CO), 145.1 (C), 133.3 (C), 128.6 (CH), 128.4 (CH), 128.0 (C), 127.9 (CH), 103.1 (CH), 41.0 ( $\text{CH}_2$ ), 31.9 ( $\text{CH}_2$ ), 20.2 ( $\text{CH}_2$ ), 13.9 ( $\text{CH}_3$ ); HRMS (ESI) calcd for  $\text{C}_{24}\text{H}_{27}\text{N}_2\text{O}_2\text{S}_2$  [ $\text{M} + \text{H}$ ] $^+$  439.1509, found 439.1513.

### Aza-Pechmann dye **2d**

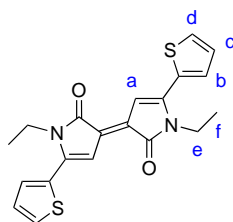

Compound **2d** was synthesized following the described **procedure A**. A solution of dilactone **1b**<sup>5</sup> (0.20 g, 0.61 mmol) and ethylamine (70% in water, 2.44 mmol, 0.20 mL) in AcOH (4 mL) was stirred under reflux during 2 h. Subsequently, the excess of acetic acid was removed under reduced pressure. The resulting residue was redissolved in 100 mL of  $\text{CH}_2\text{Cl}_2$  and sequentially washed successively with  $\text{H}_2\text{O}$  (100 mL), a saturated aqueous solution of  $\text{NaHCO}_3$  (100 mL) and brine (100 mL). Finally, the crude product was purified by silica-gel column chromatography by eluting with 1:1  $\text{CHCl}_3$ /hexane to 100:1  $\text{CHCl}_3$ /Acetone to give **2d** (0.1917 g; 82%). m.p. 235-237 °C (violet prisms); IR (solid, ATR,  $\text{cm}^{-1}$ )  $\nu = 1670$  (s, CO), 1486 (m), 1282 (m), 1142 (m), 952 (m), 841 (m), 757 (s), 719 (s), 674 (m);  $^1\text{H}$  NMR (400 MHz,  $\text{CDCl}_3$ , 298 K)  $\delta$  7.48 (dd,  $J = 5.1, 1.0$  Hz, 2H,  $\text{H}_d$ ), 7.44 (dd,  $J = 3.8, 1.0$  Hz, 2H,  $\text{H}_b$ ), 7.15 (dd,  $J = 5.1, 3.8$  Hz, 2H,  $\text{H}_c$ ), 7.09 (s, 2H,  $\text{H}_a$ ), 3.93 (q,  $J = 7.1$  Hz, 4H,  $\text{H}_e$ ), 1.25 (t,  $J = 7.1$  Hz, 3H,  $\text{H}_f$ );  $^{13}\text{C}$  NMR (100 MHz,  $\text{CDCl}_3$ , 298 K)  $\delta$  170.7 (CO), 144.9 (C), 133.2 (C), 128.6 (CH), 128.5 (CH), 128.1 (C), 127.9 (CH), 103.1 (CH), 36.1 ( $\text{CH}_2$ ), 15.06 ( $\text{CH}_3$ ); HRMS (ESI) calcd for  $\text{C}_{20}\text{H}_{19}\text{N}_2\text{O}_2\text{S}_2$  [ $\text{M} + \text{H}$ ] $^+$  383.0883, found 383.0891.

### 3. Synthesis and experimental data of [2]rotaxanes 3a-i

A solution of the corresponding dye **2** (1 eq) and Et<sub>3</sub>N (12 eq) in CHCl<sub>3</sub> (300 mL/mmol of thread) was stirred vigorously whilst two solutions of i) *p*-xylylene diamine (8 eq) and Et<sub>3</sub>N (12 eq) in CHCl<sub>3</sub> (20 mL) and ii) the corresponding isophthaloyl chloride (8 eq) in CHCl<sub>3</sub> (20 mL) were simultaneously added over a period of 4 h using a motor-driven syringe pump. After 4 h of stirring at room temperature, the resulting suspension was filtered through a Celite pad, and subsequently washed with water (400 mL), an aqueous solution of 1 M HCl (2 x 300 mL), a saturated aqueous solution of NaHCO<sub>3</sub> (2 x 300 mL) and brine (200 mL). The organic phase was dried over MgSO<sub>4</sub>, and the solvent removed under reduced pressure. The resulting solid was purified by silica-gel column chromatography to yield unconsumed dye **2** and the corresponding [2]rotaxane.

#### Rotaxane 3a

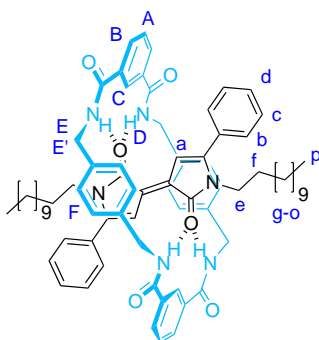

Rotaxane **3a** was obtained from **2a** (0.60 g, 0.92 mmol) by using the general procedure described above. The crude product was purified by silica-gel column chromatography eluting with 19:1 to 9:1 CHCl<sub>3</sub>/acetone to give the title compound as a blue solid (192 mg; 18%); m.p. 240-242 °C; IR (solid, ATR, cm<sup>-1</sup>)  $\nu$  = 3371 (w, NH), 2921 (m), 2851 (w), 1660 (s, CO), 1645 (s, CO), 1529 (s), 1265 (m), 1076 (m), 759 (m), 724 (m), 696 (m); <sup>1</sup>H NMR (400 MHz, CDCl<sub>3</sub>, 298 K)  $\delta$  9.07 (s, 2H, H<sub>C</sub>), 8.24 (dd, *J* = 7.8, 1.3 Hz, 4H, H<sub>B</sub>), 7.61 (t, *J* = 7.8 Hz, 2H, H<sub>A</sub>), 7.54 (d, *J* = 9.0 Hz, 4H, H<sub>D</sub>), 7.35 (t, *J* = 7.5 Hz, 2H, H<sub>d</sub>), 7.20 (t, *J* = 7.8 Hz, 4H, H<sub>c</sub>), 6.86 – 6.84 (m, 12H, H<sub>F+fb</sub>), 6.01 (s, 2H, H<sub>a</sub>), 5.15 (dd, *J* = 14.2, 9.0 Hz, 4H, H<sub>E</sub>), 3.78 (d, *J* = 14.2 Hz, 4H, H<sub>E'</sub>), 3.67 – 3.63 (m, 4H, H<sub>e</sub>), 1.58 – 1.51 (m, 4H, H<sub>f</sub>), 1.29 – 1.19 (m, 36H, H<sub>g-o</sub>), 0.86 (t, *J* = 6.9 Hz, 6H, H<sub>p</sub>); <sup>13</sup>C NMR (100 MHz, CDCl<sub>3</sub>, 298 K)  $\delta$  172.7 (CO), 165.3 (CO), 152.4 (C), 137.2 (C), 133.7 (C), 132.0 (CH), 130.6 (CH), 129.9 (CH), 129.40 (CH), 129.36 (C), 129.1 (CH), 127.5 (C), 126.5 (CH), 123.3 (CH), 102.4 (CH), 43.9 (CH<sub>2</sub>), 41.4 (CH<sub>2</sub>), 32.0 (CH<sub>2</sub>), 29.72 (CH<sub>2</sub>), 29.70 (CH<sub>2</sub>), 29.65 (CH<sub>2</sub>), 29.5 (CH<sub>2</sub>), 29.4 (CH<sub>2</sub>), 29.1 (CH<sub>2</sub>), 26.8 (CH<sub>2</sub>), 22.8 (CH<sub>2</sub>), 14.3 (CH<sub>3</sub>). HRMS (ESI) calcd for C<sub>76</sub>H<sub>91</sub>N<sub>6</sub>O<sub>6</sub> [M + H]<sup>+</sup> 1183.6995, found 1183.7005.



## Rotaxane 3b

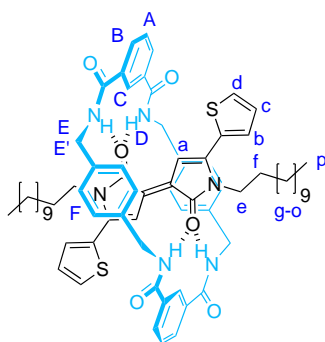

Rotaxane **3b** was obtained from **2b** (1.0 g, 1.51 mmol) by using the general procedure described above. The crude product was purified by silica-gel column chromatography eluting with 19:1 to 9:1 CHCl<sub>3</sub>/acetone to give the title compound as a blue solid (213 mg; 12%); m.p. 232-234 °C; IR (solid, ATR, cm<sup>-1</sup>)  $\nu$  = 3353 (w, NH), 3326 (w, NH), 2919 (w), 2851 (w), 1655 (s, CO), 1643 (s, CO), 1284 (m), 1254 (m), 1143 (m), 822 (m), 724 (s), 695 (m); <sup>1</sup>H NMR (400 MHz, CDCl<sub>3</sub>, 298 K)  $\delta$  9.20 (s, 2H, H<sub>C</sub>), 8.34 (d,  $J$  = 7.8 Hz, 4H, H<sub>B</sub>), 7.71 (t,  $J$  = 7.8 Hz, 2H, H<sub>A</sub>), 7.60 (d,  $J$  = 8.6 Hz, 4H, H<sub>D</sub>), 7.35 (d,  $J$  = 5.1 Hz, 2H, H<sub>d</sub>), 6.92 – 6.90 (m, 2H, H<sub>c</sub>), 6.82 (s, 8H, H<sub>F</sub>), 6.66 (d,  $J$  = 3.7 Hz, 2H, H<sub>b</sub>), 6.26 (s, 2H, H<sub>a</sub>), 5.06 (dd,  $J$  = 14.1, 8.6 Hz, 4H, H<sub>E</sub>), 3.86 – 3.79 (m, 8H, H<sub>E'+e</sub>), 1.74 – 1.64 (m, 4H, H<sub>f</sub>), 1.44 – 1.22 (m, 36H, H<sub>g-o</sub>), 0.86 (t,  $J$  = 6.5 Hz, 6H, H<sub>p</sub>); <sup>13</sup>C NMR (100 MHz, CDCl<sub>3</sub>, 298 K)  $\delta$  172.1 (CO), 165.5 (CO), 144.5 (C), 136.9 (C), 134.1 (C), 132.2 (CH), 131.3 (C), 130.2 (CH), 129.8 (CH), 129.2 (CH), 129.0 (CH), 128.4 (CH), 126.2 (C), 123.7 (CH), 101.7 (CH), 44.1 (CH<sub>2</sub>), 41.5 (CH<sub>2</sub>), 32.0 (CH<sub>2</sub>), 30.1 (CH<sub>2</sub>), 29.72 (CH<sub>2</sub>), 29.67 (CH<sub>2</sub>), 29.63 (CH<sub>2</sub>), 29.4 (CH<sub>2</sub>), 29.3 (CH<sub>2</sub>), 26.9 (CH<sub>2</sub>), 22.8 (CH<sub>2</sub>), 14.2 (CH<sub>3</sub>). HRMS (ESI) calcd for C<sub>72</sub>H<sub>87</sub>N<sub>6</sub>O<sub>6</sub>S<sub>2</sub> [M + H]<sup>+</sup> 1195.6123, found 1195.6138.

## Rotaxane 3c

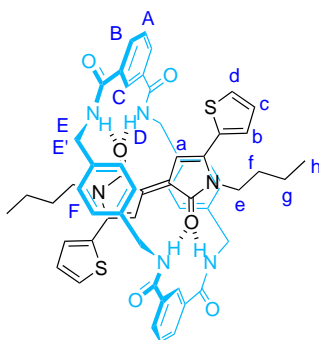

Rotaxane **3c** was obtained from **2c** (0.8 g, 1.82 mmol) by using the general procedure described above. The crude product was purified by silica-gel column chromatography eluting with 20:1 to 5:1 CHCl<sub>3</sub>/acetone to give the title compound as a blue solid (258 mg; 15%); m.p. > 300 °C; IR (solid, ATR, cm<sup>-1</sup>)  $\nu$  = 3386 (w, NH), 3357 (w, NH), 1657 (s, CO), 1646 (s, CO), 1528 (s), 1285 (m), 1142 (m), 851 (m), 765 (m), 725 (s), 697 (s); <sup>1</sup>H NMR (400 MHz, CDCl<sub>3</sub>, 298 K)  $\delta$  9.20 (s, 2H, H<sub>C</sub>), 8.34 (dd, *J* = 7.8, 1.5 Hz, 4H, H<sub>B</sub>), 7.71 (t, *J* = 7.8 Hz, 2H, H<sub>A</sub>), 7.59 (d, *J* = 8.3 Hz, 4H, H<sub>D</sub>), 7.36 (dd, *J* = 5.1, 0.9 Hz, 2H, H<sub>d</sub>), 6.91 (dd, *J* = 5.1, 3.8 Hz, 2H, H<sub>c</sub>), 6.82 (s, 8H, H<sub>F</sub>), 6.67 (dd, *J* = 3.8, 0.9 Hz, 2H, H<sub>b</sub>), 6.27 (s, 2H, H<sub>a</sub>), 5.06 (dd, *J* = 14.1, 8.3 Hz, 4H, H<sub>E</sub>), 3.88 – 3.80 (m, 8H, H<sub>E'+e</sub>), 1.71 – 1.63 (m, 4H, H<sub>i</sub>), 1.48 – 1.39 (m, 4H, H<sub>g</sub>), 1.00 (t, *J* = 7.4 Hz, 6H, H<sub>h</sub>); <sup>13</sup>C NMR (100 MHz, CDCl<sub>3</sub>, 298 K)  $\delta$  172.1 (CO), 165.6 (CO), 144.5 (C), 136.9 (C), 134.1 (C), 132.2 (CH), 131.3 (C), 130.2 (CH), 129.8 (CH), 129.2 (CH), 129.0 (CH), 128.4 (CH), 126.2 (C), 123.7 (CH), 101.8 (CH), 44.1 (CH<sub>2</sub>), 41.3 (CH<sub>2</sub>), 32.2 (CH<sub>2</sub>), 20.2 (CH<sub>2</sub>), 13.9 (CH<sub>3</sub>). HRMS (ESI) calcd for C<sub>56</sub>H<sub>55</sub>N<sub>6</sub>O<sub>6</sub>S<sub>2</sub> [M + H]<sup>+</sup> 971.3619, found 971.3627.

## Rotaxane 3d

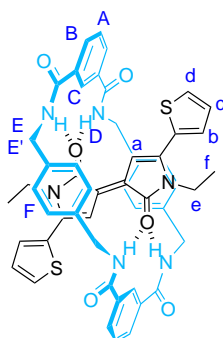

Rotaxane **3d** was obtained from **2d** (552 mg, 1.39 mmol) by using the general procedure described above. The crude product was purified by column chromatography on silica gel eluting with 49:1 to 9:1 CHCl<sub>3</sub>/acetone to give a mixture (44 mg) of the dye **2d** and the title product (33 mg; 3%) as a blue solid, in a ratio of 25:75 respectively. The sample was contaminated with other unknown impurities. <sup>1</sup>H NMR (400 MHz, CDCl<sub>3</sub>, 298 K) δ 9.20 (s, 2H, H<sub>C</sub>), 8.34 (dd, *J* = 7.8, 1.5 Hz, 4H, H<sub>B</sub>), 7.71 (t, *J* = 7.8 Hz, 2H, H<sub>A</sub>), 7.61 (d, *J* = 8.4 Hz, 4H, H<sub>D</sub>), 7.35 (dd, *J* = 5.1, 0.9 Hz, 2H, H<sub>d</sub>), 6.94 (dd, *J* = 5.1, 3.8 Hz, 2H, H<sub>c</sub>), 6.83 (s, 8H, H<sub>F</sub>), 6.74 (dd, *J* = 3.8, 0.9 Hz, 2H, H<sub>b</sub>), 6.27 (s, 2H, H<sub>a</sub>), 5.06 (dd, *J* = 14.1, 8.4 Hz, 4H, H<sub>E</sub>), 3.96 (q, *J* = 6.8 Hz, 4H, H<sub>e</sub>), 3.82 (d, *J* = 14.1 Hz, 4H, H<sub>E</sub>), 1.36 (t, *J* = 6.8 Hz, 6H, H<sub>f</sub>); <sup>13</sup>C NMR (100 MHz, CDCl<sub>3</sub>, 298 K): 172.0 (CO), 165.6 (CO), 144.3 (C), 136.9 (C), 134.1 (C), 132.2 (CH), 131.3 (C), 130.3 (CH), 129.8 (CH), 129.2 (CH), 129.1 (CH), 128.3 (CH), 126.3 (C), 123.7 (CH), 101.8 (CH), 44.1 (CH<sub>2</sub>), 36.4 (CH<sub>2</sub>), 15.4 (CH<sub>3</sub>).

## Rotaxane 3e

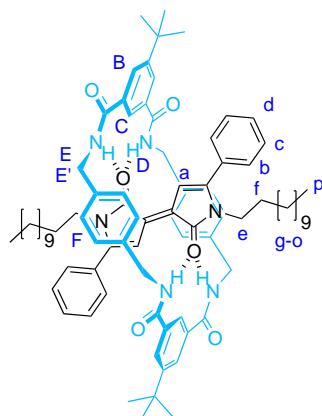

Rotaxane **3e** was obtained from **2a** (0.6 g, 0.92 mmol) by using the general procedure described above. The crude product was purified by column chromatography on silica gel eluting with 49:1 to 19:1 CHCl<sub>3</sub>/acetone to give the title product as a blue solid (106 mg; 9%); m.p. 215-217 °C; IR (solid, ATR, cm<sup>-1</sup>)  $\nu$  = 3382 (w, NH), 2922 (m), 2851 (m), 1645 (s, CO), 1527 (s), 1248 (s), 1137 (w), 754 (m), 696 (s); <sup>1</sup>H NMR (600 MHz, CDCl<sub>3</sub>, 298 K)  $\delta$  8.95 (s, 2H, H<sub>C</sub>), 8.31 (d,  $J$  = 1.1 Hz, 4H, H<sub>B</sub>), 7.50 (d,  $J$  = 8.7 Hz, 4H, H<sub>D</sub>), 7.30 (t,  $J$  = 7.5 Hz, 2H, H<sub>d</sub>), 7.18 (t,  $J$  = 7.8 Hz, 4H, H<sub>c</sub>), 6.93 (d,  $J$  = 7.2 Hz, 4H, H<sub>b</sub>), 6.88 (s, 8H, H<sub>F</sub>), 6.13 (s, 2H, H<sub>a</sub>), 5.12 (dd,  $J$  = 14.2, 8.7 Hz, 4H, H<sub>E</sub>), 3.81 (d,  $J$  = 14.2 Hz, 4H, H<sub>E</sub>), 3.65 – 3.63 (m, 4H, H<sub>e</sub>), 1.56 – 1.51 (m, 4H, H<sub>i</sub>), 1.42 (s, 18H, <sup>t</sup>Bu), 1.27 – 1.18 (m, 36H, H<sub>g-o</sub>), 0.85 (t,  $J$  = 7.1 Hz, 6H, H<sub>p</sub>); <sup>13</sup>C NMR (150 MHz, CDCl<sub>3</sub>, 298 K)  $\delta$  172.5 (CO), 165.7 (CO), 153.2 (C), 152.4 (C), 137.2 (C), 133.2 (C), 130.5 (CH), 129.4 (C), 129.3 (CH), 129.2 (CH), 129.1 (CH), 127.5 (C), 126.7 (CH), 120.7 (CH), 102.4 (CH), 44.0 (CH<sub>2</sub>), 41.4 (CH<sub>2</sub>), 35.4 (C), 32.0 (CH<sub>2</sub>), 31.5 (CH<sub>3</sub>), 29.69 (CH<sub>2</sub>), 29.67 (CH<sub>2</sub>), 29.6 (CH<sub>2</sub>), 29.5 (CH<sub>2</sub>), 29.42 (CH<sub>2</sub>), 29.40 (CH<sub>2</sub>), 29.1 (CH<sub>2</sub>), 26.8 (CH<sub>2</sub>), 22.8 (CH<sub>2</sub>), 14.2 (CH<sub>3</sub>). HRMS (ESI) calcd for C<sub>84</sub>H<sub>107</sub>N<sub>6</sub>O<sub>6</sub> [M + H]<sup>+</sup> 1295.8247, found 1295.8257.

## Rotaxane 3f

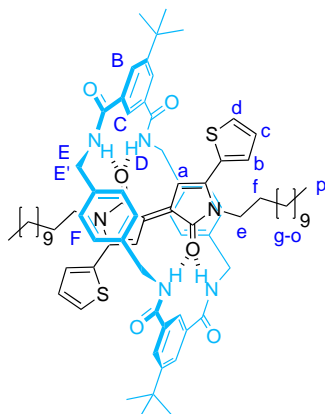

Rotaxane **3f** was obtained from **2b** (1 g, 1.51 mmol) by using the general procedure described above. The crude product was purified by column chromatography on silica gel eluting with 49:1 to 19:1 CHCl<sub>3</sub>/acetone to give the title product as a blue solid (233 mg; 12%); m.p. 258-260 °C; IR (solid, ATR, cm<sup>-1</sup>)  $\nu$  = 3385 (w, NH), 2923 (m), 2851 (w), 1661 (s, CO), 1645 (s, CO), 1529 (s), 1247 (m), 1141 (m), 697 (m); <sup>1</sup>H NMR (400 MHz, CDCl<sub>3</sub>, 298 K)  $\delta$  9.07 (s, 2H, H<sub>C</sub>), 8.40 (s, 4H, H<sub>B</sub>), 7.57 (d,  $J$  = 8.6 Hz, 4H, H<sub>D</sub>), 7.31 (d,  $J$  = 5.1 Hz, 2H, H<sub>d</sub>), 6.93 – 6.90 (m, 2H, H<sub>c</sub>), 6.82 (s, 8H, H<sub>F</sub>), 6.79 (d,  $J$  = 3.7 Hz, 2H, H<sub>b</sub>), 6.30 (s, 2H, H<sub>a</sub>), 5.06 (dd,  $J$  = 14.1, 8.6 Hz, 4H, H<sub>E</sub>), 3.86 – 3.80 (m, 8H, H<sub>E'</sub> + H<sub>e</sub>), 1.71 – 1.66 (m, 4H, H<sub>f</sub>), 1.47 (s, 18H, <sup>t</sup>Bu), 1.42-1.22 (m, 36H, H<sub>g-o</sub>), 0.86 (t,  $J$  = 6.9 Hz, 6H, H<sub>p</sub>); <sup>13</sup>C NMR (100 MHz, CDCl<sub>3</sub>, 298 K)  $\delta$  172.0 (CO), 166.0 (CO), 153.4 (C), 144.5 (C), 137.0 (C), 133.8 (C), 131.5 (C), 130.1 (CH), 129.3 (CH), 129.2 (CH), 128.9 (CH), 128.2 (CH), 126.3 (C), 121.1 (CH), 101.8 (CH), 44.2 (CH<sub>2</sub>), 41.5 (CH<sub>2</sub>), 35.5 (C), 32.0 (CH<sub>2</sub>), 31.6 (CH<sub>3</sub>), 30.1 (CH<sub>2</sub>), 29.73 (CH<sub>2</sub>), 29.68 (CH<sub>2</sub>), 29.6 (CH<sub>2</sub>), 29.4 (CH<sub>2</sub>), 29.3 (CH<sub>2</sub>), 26.9 (CH<sub>2</sub>), 22.8 (CH<sub>2</sub>), 14.3 (CH<sub>3</sub>). HRMS (ESI) calcd for C<sub>80</sub>H<sub>103</sub>N<sub>6</sub>O<sub>6</sub>S<sub>2</sub> [M + H]<sup>+</sup> 1307.7375, found 1307.7362.

## Rotaxane 3g

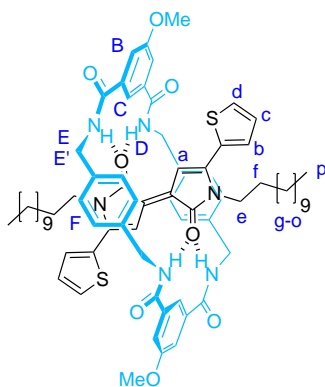

Rotaxane **3g** was obtained from **2b** (0.8 g, 1.21 mmol) by using the general procedure described above. The crude product was purified by column chromatography on silica gel eluting with 49:1 to 9:1 CHCl<sub>3</sub>/acetone to give the title product as a blue solid (233 mg; 15%); m.p. 233-235 °C; IR (solid, ATR, cm<sup>-1</sup>)  $\nu$  = 3381 (s, NH), 2923 (m), 2850 (w), 1666 (s, CO), 1646 (m, CO), 1524 (s), 1306 (m), 1134 (m), 722 (m); <sup>1</sup>H NMR (400 MHz, CDCl<sub>3</sub>, 298 K)  $\delta$  8.77 (s, 2H, H<sub>C</sub>), 7.86 (s, 4H, H<sub>B</sub>), 7.58 (d,  $J$  = 8.7 Hz, 4H, H<sub>D</sub>), 7.38 (d,  $J$  = 5.0 Hz, 2H, H<sub>d</sub>), 6.91 (dd,  $J$  = 5.0, 3.9 Hz, 2H, H<sub>c</sub>), 6.80 (s, 8H, H<sub>F</sub>), 6.57 (d,  $J$  = 3.9 Hz, 2H, H<sub>b</sub>), 6.23 (s, 2H, H<sub>a</sub>), 5.08 (dd,  $J$  = 14.0, 8.7 Hz, 4H, H<sub>E</sub>), 3.98 (s, 6H, OMe), 3.86 – 3.82 (m, 4H, H<sub>e</sub>), 3.77 (d,  $J$  = 14.0 Hz, 4H, H<sub>E'</sub>), 1.71 – 1.63 (m, 4H, H<sub>f</sub>), 1.45 – 1.23 (m, 36H, H<sub>g-o</sub>), 0.86 (t,  $J$  = 6.8 Hz, 6H, H<sub>p</sub>); <sup>13</sup>C NMR (100 MHz, CDCl<sub>3</sub>, 298 K)  $\delta$  172.0 (CO), 165.3 (CO), 161.2 (C), 144.5 (C), 137.0 (C), 135.8 (C), 131.2 (C), 130.1 (CH), 129.2 (CH), 128.8 (CH), 128.6 (CH), 126.2 (C), 117.6 (CH), 116.0 (CH), 101.8 (CH), 56.0 (CH<sub>3</sub>), 44.1 (CH<sub>2</sub>), 41.5 (CH<sub>2</sub>), 32.0 (CH<sub>2</sub>), 30.1 (CH<sub>2</sub>), 29.8 (CH<sub>2</sub>), 29.70 (CH<sub>2</sub>), 29.65 (CH<sub>2</sub>), 29.4 (CH<sub>2</sub>), 29.3 (CH<sub>2</sub>), 26.9 (CH<sub>2</sub>), 22.8 (CH<sub>2</sub>), 14.3 (CH<sub>3</sub>). HRMS (ESI) calcd for C<sub>74</sub>H<sub>91</sub>N<sub>6</sub>O<sub>8</sub>S<sub>2</sub> [M + H]<sup>+</sup> 1255.6334, found 1255.6319.

## Rotaxane 3h

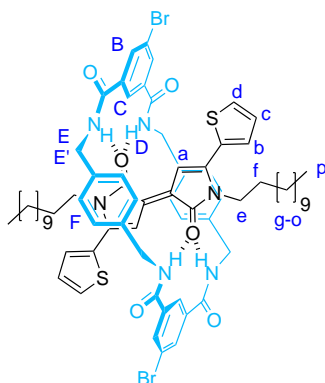

Rotaxane **3h** was obtained from **2b** (841 mg, 1.27 mmol) by using the general procedure described above. The crude product was purified by column chromatography on silica gel eluting with 49:1 to 19:1 CHCl<sub>3</sub>/acetone to give the title product as a blue solid (402 mg; 23%); m.p. 226-228 °C; IR (solid, ATR, cm<sup>-1</sup>)  $\nu$  = 3393 (w, NH), 3367 (w, NH), 2922 (m), 2848 (m), 1667 (s, CO), 1644 (s, CO), 1525 (s), 1282 (m), 1134 (m), 723 (s), 670 (s); <sup>1</sup>H NMR (400 MHz, CDCl<sub>3</sub>, 298 K)  $\delta$  9.09 (s, 2H, H<sub>C</sub>), 8.46 (d,  $J$  = 1.1 Hz, 4H, H<sub>B</sub>), 7.54 (d,  $J$  = 8.6 Hz, 4H, H<sub>D</sub>), 7.45 (dd,  $J$  = 5.1, 0.9 Hz, 2H, H<sub>d</sub>), 7.04 (dd,  $J$  = 5.1, 3.8 Hz, 2H, H<sub>c</sub>), 6.80 (s, 8H, H<sub>F</sub>), 6.68 (dd,  $J$  = 3.8, 0.9 Hz, 2H, H<sub>b</sub>), 6.11 (s, 2H, H<sub>a</sub>), 5.07 (dd,  $J$  = 13.7, 8.6 Hz, 4H, H<sub>E</sub>), 3.86 – 3.82 (m, 4H, H<sub>e</sub>), 3.78 (d,  $J$  = 13.7 Hz, 4H, H<sub>E</sub>), 1.71 – 1.62 (m, 4H, H<sub>f</sub>), 1.44 – 1.23 (m, 36H, H<sub>g-o</sub>), 0.86 (t,  $J$  = 6.9 Hz, 6H, H<sub>p</sub>); <sup>13</sup>C NMR (100 MHz, CDCl<sub>3</sub>, 298 K)  $\delta$  172.1 (CO), 164.1 (CO), 144.7 (C), 136.9 (C), 136.0 (C), 135.2 (CH), 131.1 (C), 130.5 (CH), 129.2 (CH), 129.1 (CH), 128.4 (CH), 126.2 (C), 124.5 (C), 122.2 (CH), 101.6 (CH), 44.1 (CH<sub>2</sub>), 41.6 (CH<sub>2</sub>), 32.0 (CH<sub>2</sub>), 30.1 (CH<sub>2</sub>), 29.8 (CH<sub>2</sub>), 29.7 (CH<sub>2</sub>), 29.6 (CH<sub>2</sub>), 29.5 (CH<sub>2</sub>), 29.3 (CH<sub>2</sub>), 26.9 (CH<sub>2</sub>), 22.8 (CH<sub>2</sub>), 14.3 (CH<sub>3</sub>). HRMS (ESI) calcd for C<sub>72</sub>H<sub>85</sub> Br<sub>2</sub>N<sub>6</sub>O<sub>6</sub>S<sub>2</sub> [M + H]<sup>+</sup> 1351.4333, found 1351.4340.

## Rotaxane 3i

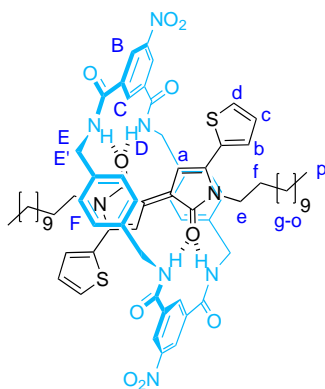

Rotaxane **3i** was obtained from thread **2b** (584 mg, 0.88 mmol) by using the general procedure described above. The crude product was purified by column chromatography on silica gel eluting with 49:1 to 19:1 CHCl<sub>3</sub>/acetone to give the title product as a blue solid (114 mg; 10%); m.p. 250-252 °C; IR (solid, ATR, cm<sup>-1</sup>)  $\nu$  = 3398 (w, NH), 3351 (w, NH), 2915 (w), 2850 (w), 1671 (m, CO), 1656 (m, CO), 1632 (m), 1519 (s), 1288 (m), 721 (s); <sup>1</sup>H NMR (400 MHz, CDCl<sub>3</sub>, 298 K)  $\delta$  9.44 (s, 2H, H<sub>c</sub>), 9.12 (d,  $J$  = 1.3 Hz, 4H, H<sub>b</sub>), 7.60 (d,  $J$  = 9.2 Hz, 4H, H<sub>d</sub>), 7.39 (dd,  $J$  = 5.1, 0.9 Hz, 2H, H<sub>d</sub>), 7.00 (dd,  $J$  = 5.1, 3.8 Hz, 2H, H<sub>c</sub>), 6.89 (dd,  $J$  = 3.8, 0.9 Hz, 2H, H<sub>b</sub>), 6.85 (s, 8H, H<sub>f</sub>), 6.10 (s, 2H, H<sub>a</sub>), 5.07 (dd,  $J$  = 13.7, 9.2 Hz, 4H, H<sub>E</sub>), 3.88 (d,  $J$  = 13.7 Hz, 4H, H<sub>E'</sub>), 3.84-3.80 (m, 4H, H<sub>e</sub>), 1.70 – 1.62 (m, 4H, H<sub>i</sub>), 1.42 – 1.22 (m, 36H, H<sub>g-o</sub>), 0.86 (t,  $J$  = 6.9 Hz, 6H, H<sub>p</sub>); <sup>13</sup>C NMR (100 MHz, CDCl<sub>3</sub>, 298 K)  $\delta$  172.2 (CO), 163.3 (CO), 149.9 (C), 144.8 (C), 136.7 (C), 136.1 (C), 131.1 (C), 130.7 (CH), 129.4 (CH), 129.3 (CH), 128.5 (CH), 128.3 (CH), 126.9 (CH), 126.4 (C), 101.7 (CH), 44.4 (CH<sub>2</sub>), 41.6 (CH<sub>2</sub>), 32.0 (CH<sub>2</sub>), 30.0 (CH<sub>2</sub>), 29.73 (CH<sub>2</sub>), 29.68 (CH<sub>2</sub>), 29.6 (CH<sub>2</sub>), 29.4 (CH<sub>2</sub>), 29.3 (CH<sub>2</sub>), 26.9 (CH<sub>2</sub>), 22.8 (CH<sub>2</sub>), 14.3 (CH<sub>3</sub>). HRMS (ESI) calcd for C<sub>72</sub>H<sub>83</sub>N<sub>8</sub>O<sub>10</sub>S<sub>2</sub> [M - H]<sup>-</sup> 1283.5674, found 1283.5693.



#### 4. ESI-HRMS of compounds 2a-d, 3a-c,e-i, 4 and 5

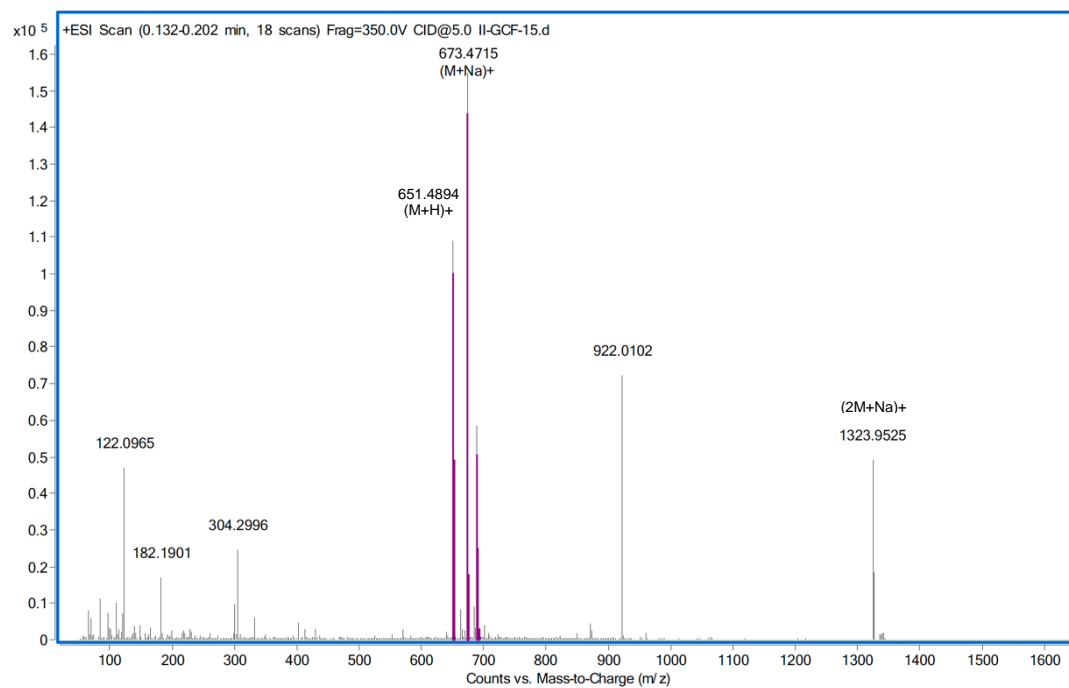

Figure S1. ESI-HRMS of 2a.

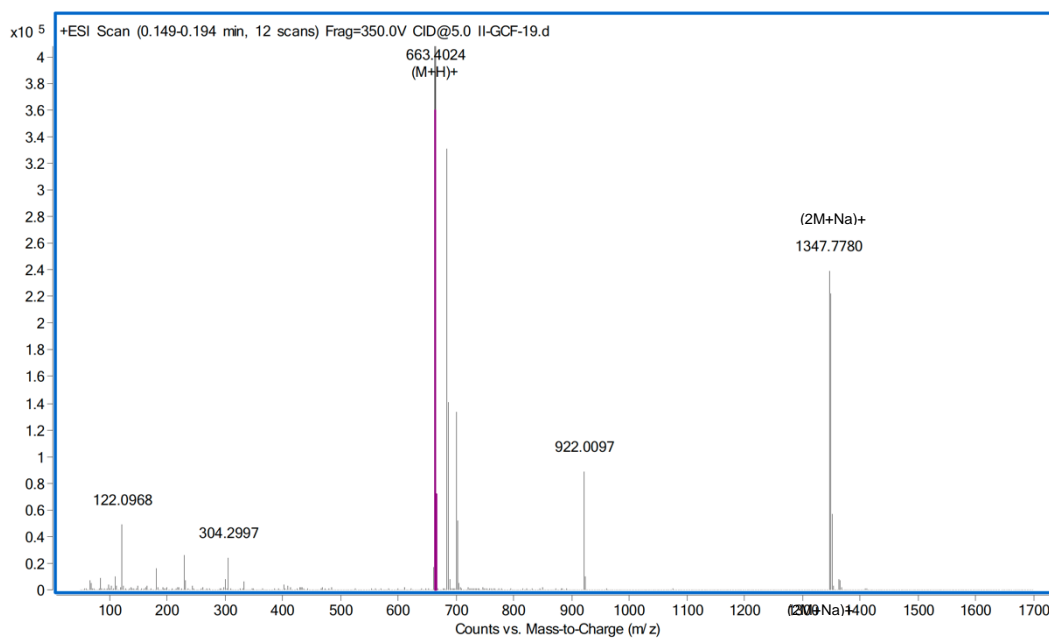

Figure S2. ESI-HRMS of 2b.

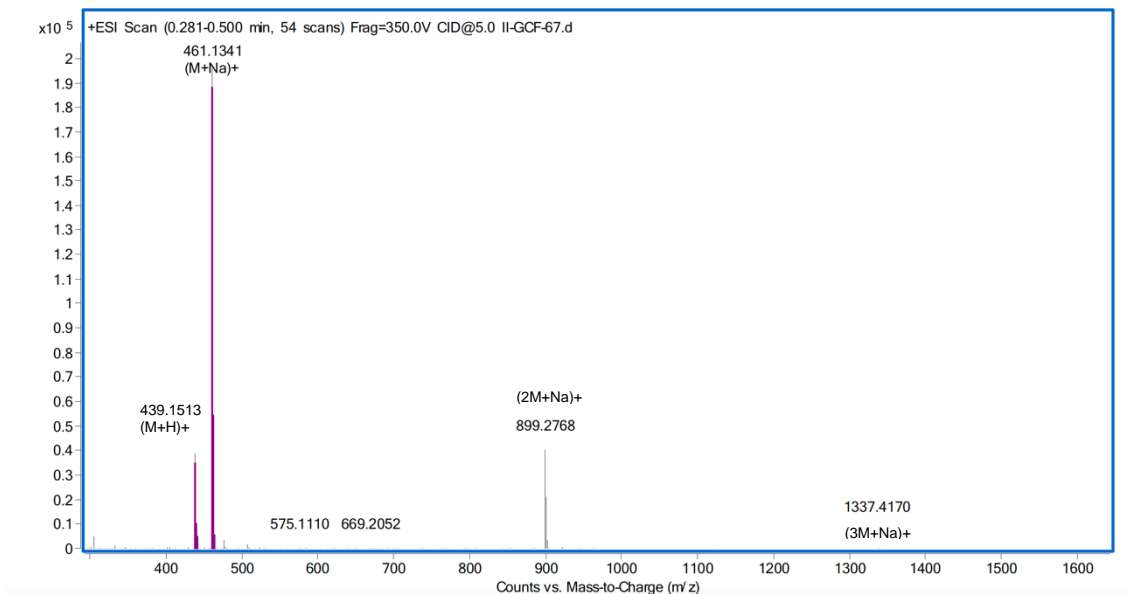

Figure S3. ESI-HRMS of 2c.

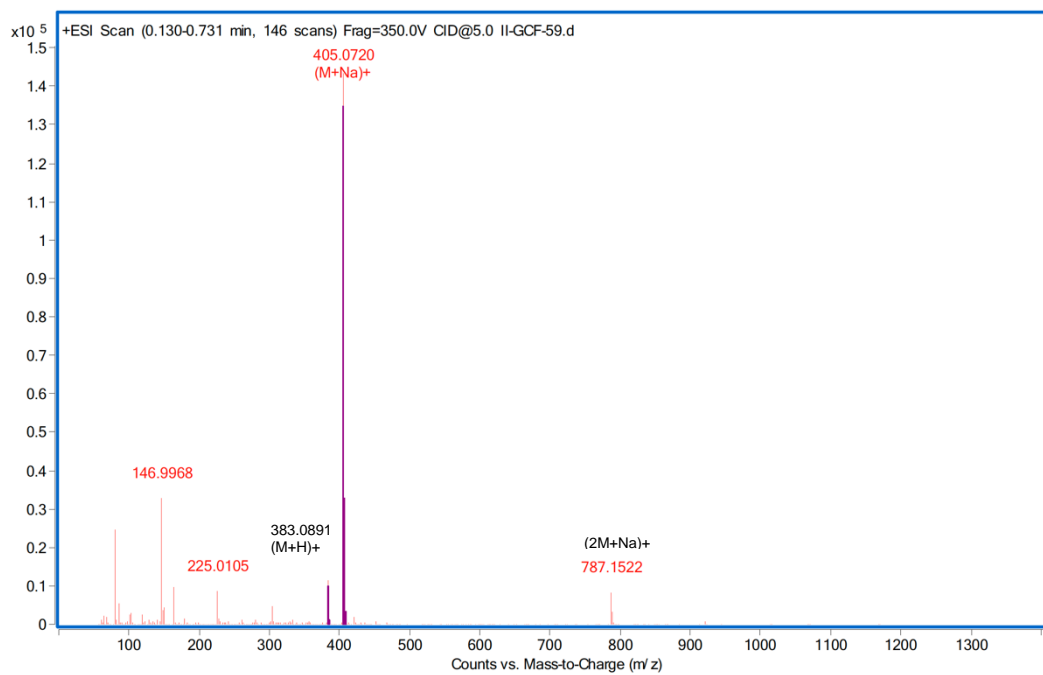

Figure S4. ESI-HRMS of 2d.

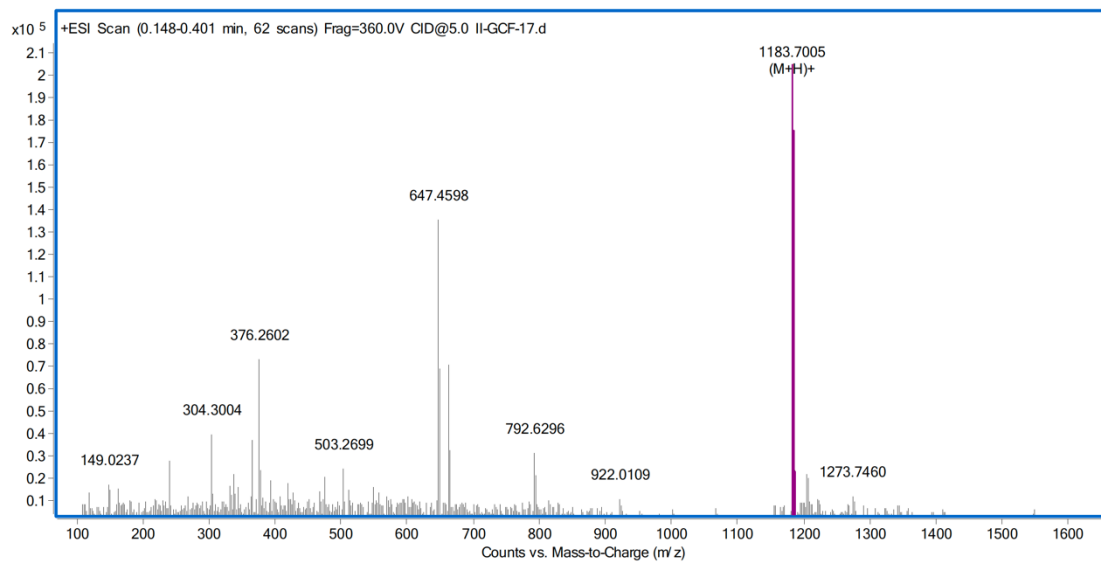

Figure S5. ESI-HRMS of 3a.

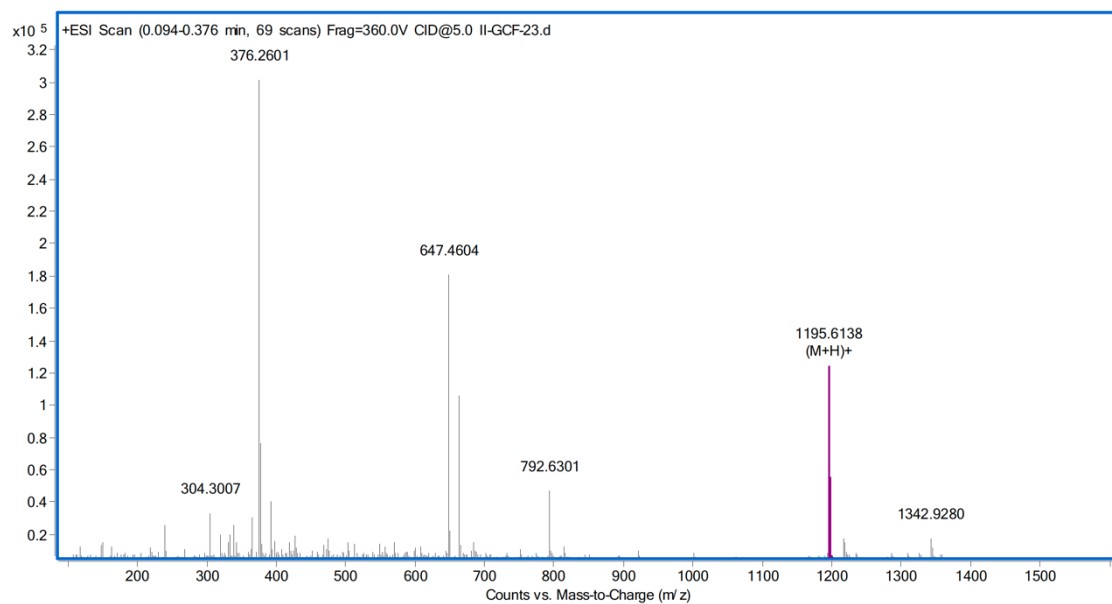

Figure S6. ESI-HRMS of 3b.

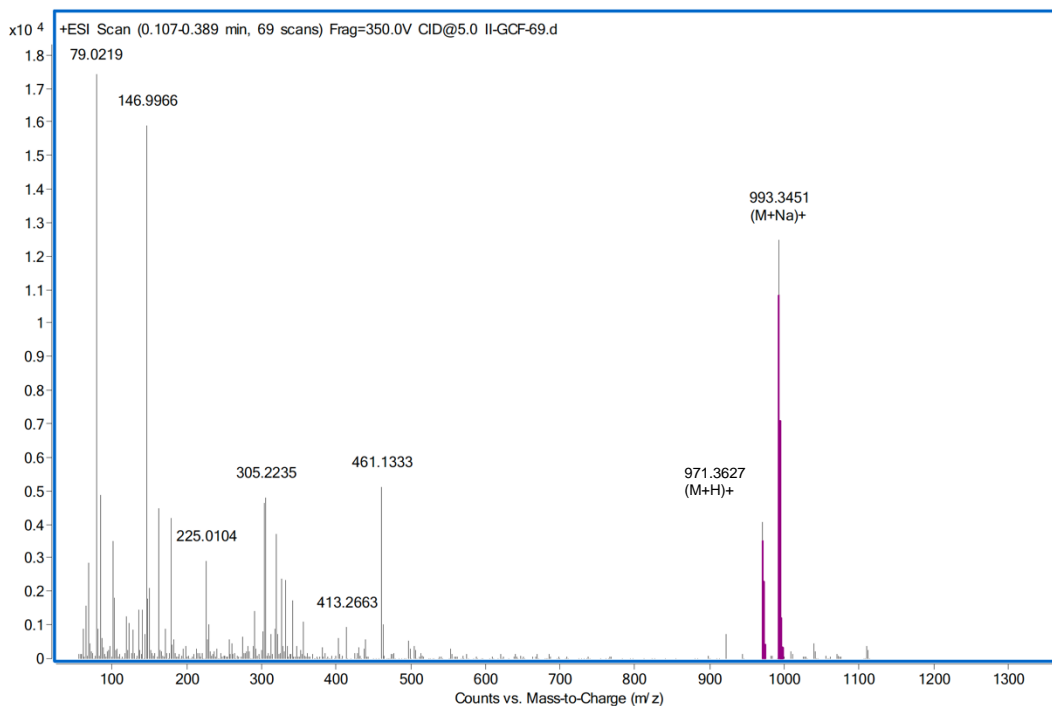

**Figure S7.** ESI-HRMS of **3c**.

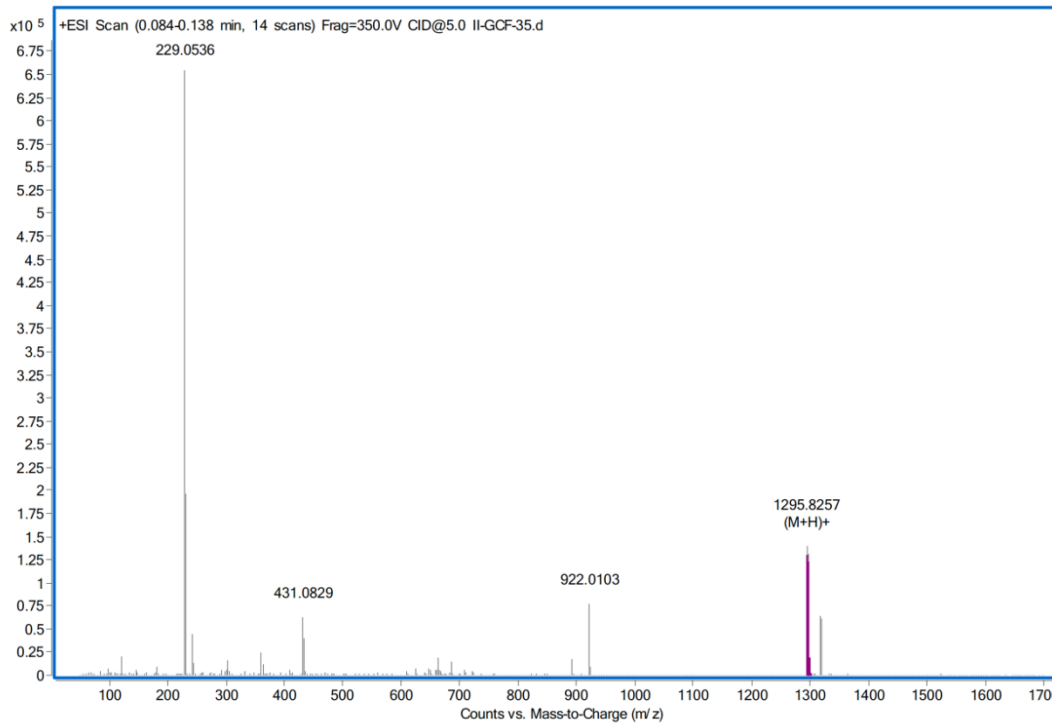

**Figure S8.** ESI-HRMS of **3e**.

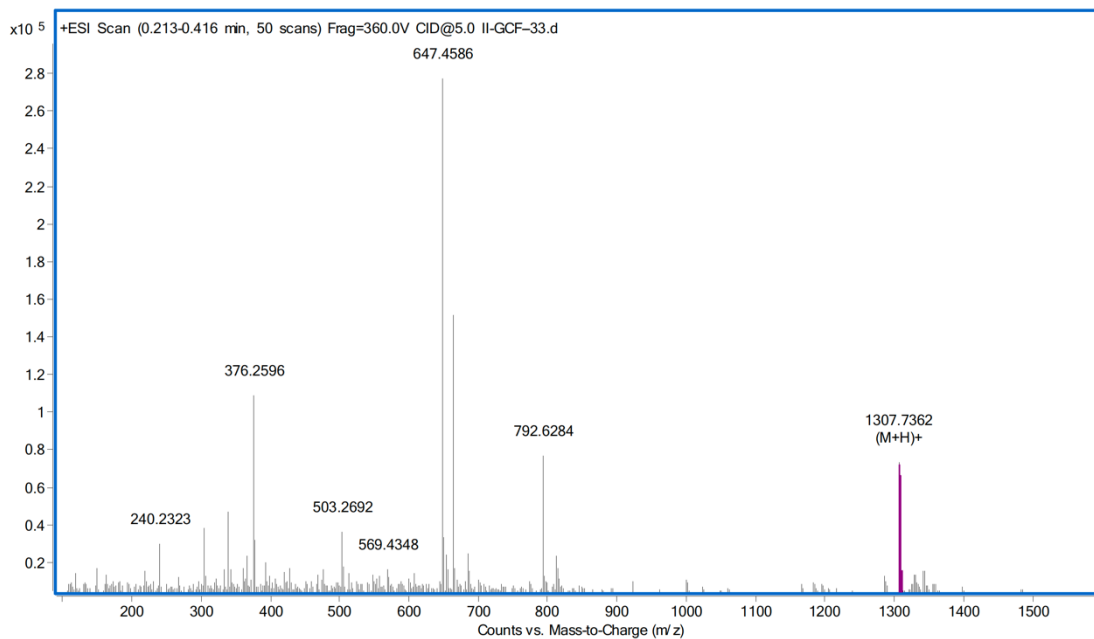

**Figure S9.** ESI-HRMS of **3f**.

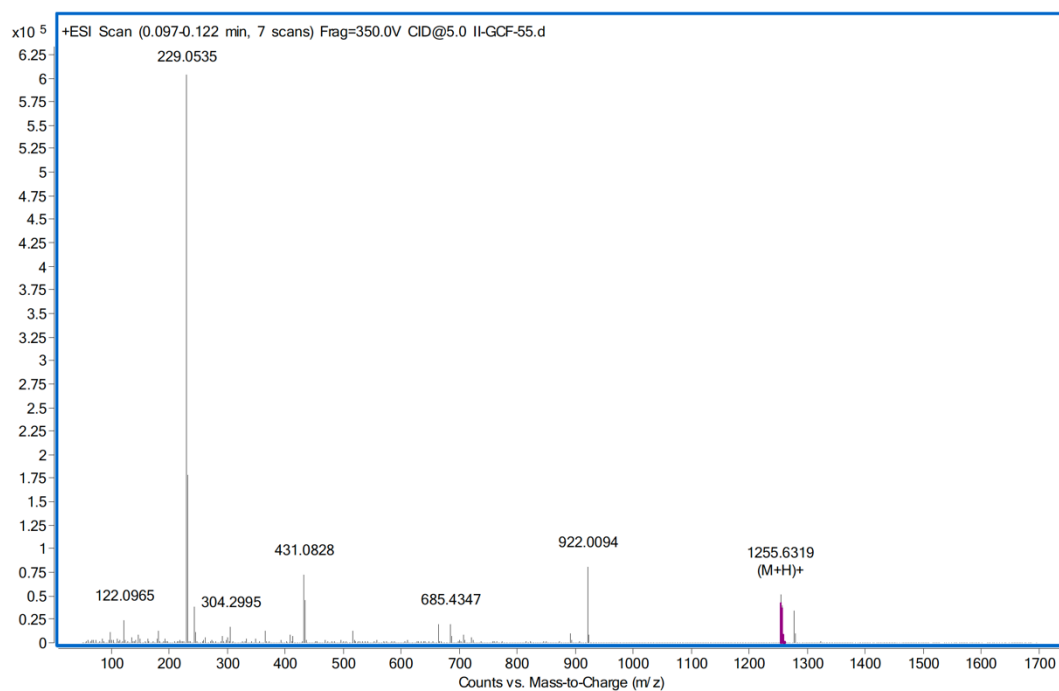

**Figure S10.** ESI-HRMS of **3g**.

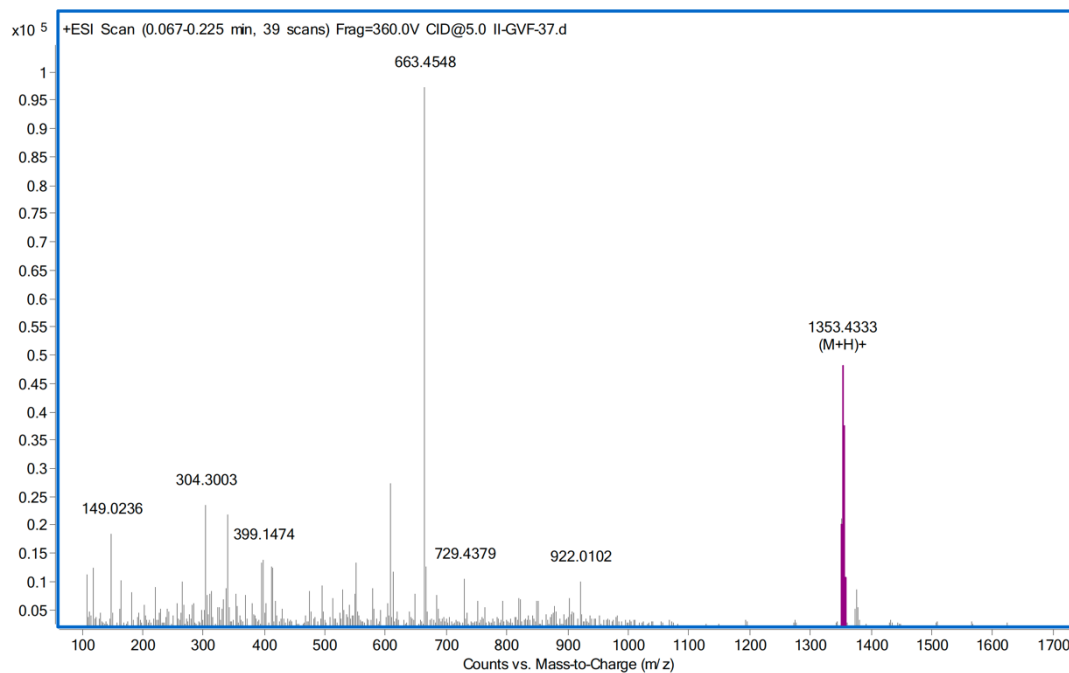

**Figure S11.** ESI-HRMS of **3h**.

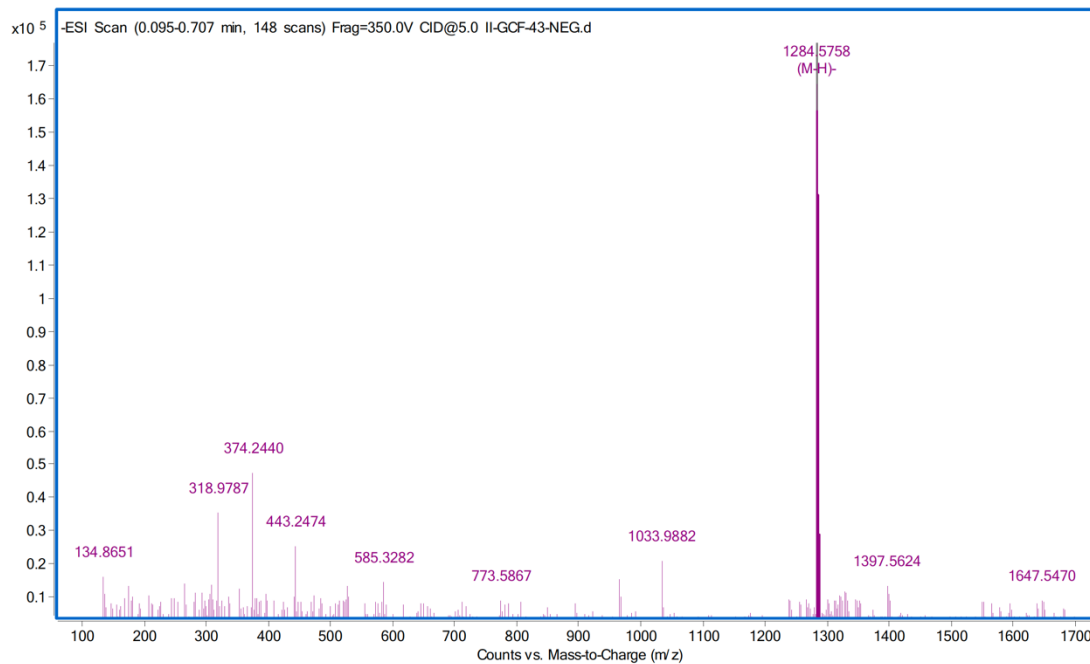

**Figure S12.** ESI-HRMS of **3i**.

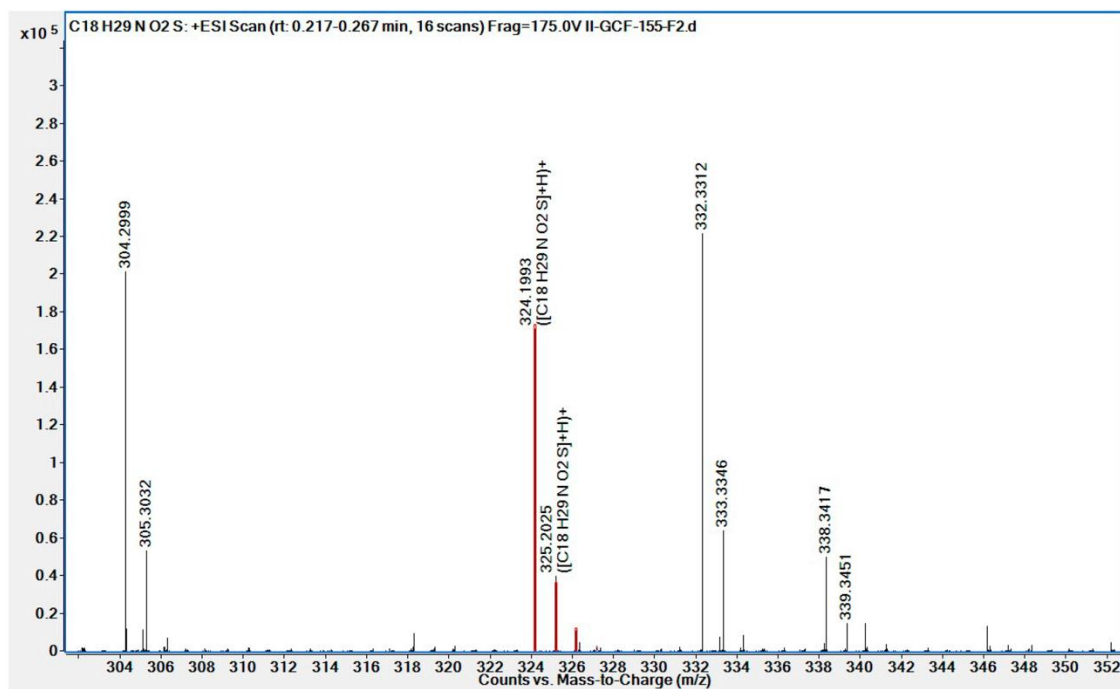

**Figure S13.** ESI-HRMS of **4**.

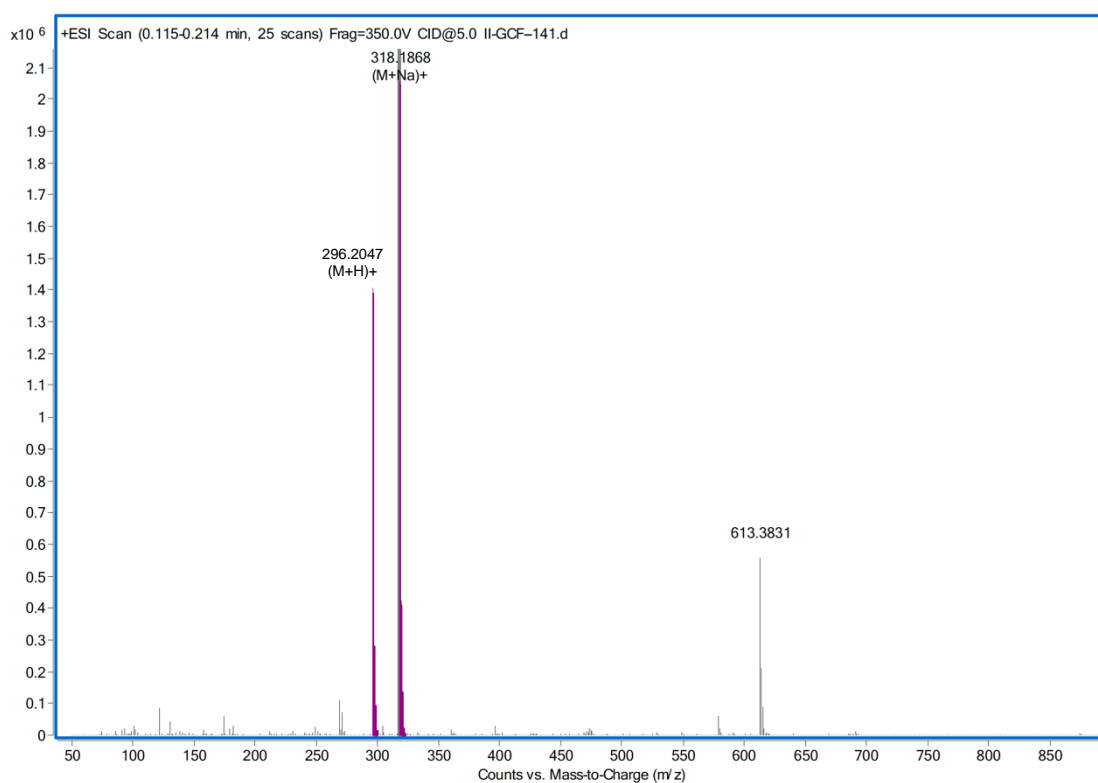

**Figure S14.** ESI-HRMS of **5**.

## 5. Crystal data and structure refinement for rotaxanes 3b and 3c

### Rotaxane 3b

Single crystals of  $C_{72}H_{86}N_6O_6S_2$  [II\_GCF\_23\_0msp] were obtained by slow diffusion of pentane in a solution of  $CHCl_3$ . Intensities were registered at low temperature (100.0 K) on a Bruker D8 QUEST system equipped with a multilayer monochromator and a Mo K/ $\alpha$  Incoatec microfocus sealed tube ( $\lambda = 0.71073 \text{ \AA}$ ). Absorption corrections were based on multi-scans (program SADABS). Using Olex2,<sup>6</sup> the structure was solved with the SHELXT<sup>7</sup> structure solution program using Intrinsic Phasing and refined with the SHELXL<sup>8, 9</sup> refinement package using Least Squares minimization. Hydrogen atoms were included using a riding model. The structure was deposited with CSD (deposition number CCDC 2335405).

**Table S1.** Crystal data and structure refinement for **3b**.

|                                          |                                    |
|------------------------------------------|------------------------------------|
| Empirical formula                        | $C_{76}H_{86}N_6O_6S_2$            |
| Formula weight                           | 1195.58                            |
| $T$ [K]                                  | 100(2)                             |
| Wavelength [ $\text{\AA}$ ]              | 0.71073                            |
| Crystal system                           | Monoclinic                         |
| Space group                              | $P2_1/c$                           |
| $a$ ( $\text{\AA}$ )                     | 14.549(5)                          |
| $b$ ( $\text{\AA}$ )                     | 14.378(5)                          |
| $c$ ( $\text{\AA}$ )                     | 30.473(10)                         |
| $\alpha$ ( $^\circ$ )                    | 90                                 |
| $\beta$ ( $^\circ$ )                     | 99.854(14)                         |
| $\gamma$ ( $^\circ$ )                    | 90                                 |
| $V$ [ $\text{\AA}^3$ ]                   | 6281(4)                            |
| $Z$                                      | 4                                  |
| $\rho$ [ $\text{g}\cdot\text{cm}^{-3}$ ] | 1.264                              |
| $\mu$ [ $\text{mm}^{-1}$ ]               | 0.144                              |
| $F_{000}$                                | 2560.0                             |
| Crystal size [ $\text{mm}^3$ ]           | 0.37 x 0.11 x 0.02                 |
| $2\theta$ range ( $^\circ$ )             | 3.578 to 56.664                    |
| $h$                                      | -19 to 19                          |
| $k$                                      | -19 to 19                          |
| $l$                                      | -40 to 40                          |
| Reflections collected                    | 242329                             |
| Independent reflections                  | 15617                              |
| R(int)                                   | 0.0764                             |
| Refinement method                        | Full-matrix least-squares on $F^2$ |



|                                          |            |
|------------------------------------------|------------|
| Parameters                               | 793        |
| Restraints                               | 215        |
| Goodness-of-fit on $F^2$                 | 1.177      |
| $R1$ [ $I > 2\sigma(I)$ ]                | 0.0666     |
| $wR2$ [ $I > 2\sigma(I)$ ]               | 0.1650     |
| $R1$ (all data)                          | 0.1174     |
| $wR2$ (all data)                         | 0.2205     |
| $\Delta\rho$ [ $e\cdot\text{\AA}^{-3}$ ] | 0.69/-0.81 |

**Table S2.** Hydrogen bonds for rotaxane **3b** [ $\text{\AA}$  and ( $^\circ$ )].

| D-H...A           | d(D-H)  | d(H...A) | d(D...A) | $\angle(\text{DHA})$ |
|-------------------|---------|----------|----------|----------------------|
| N(3)-H(03)...O(1) | 0.88(3) | 2.05(3)  | 2.917(3) | 168(3)               |
| N(4)-H(04)...O(1) | 0.82(3) | 2.41(4)  | 3.230(3) | 174(3)               |
| N(5)-H(05)...O(2) | 0.79(3) | 2.15(3)  | 2.935(3) | 172(3)               |
| N(6)-H(06)...O(2) | 0.88(3) | 2.31(3)  | 3.193(3) | 178(3)               |

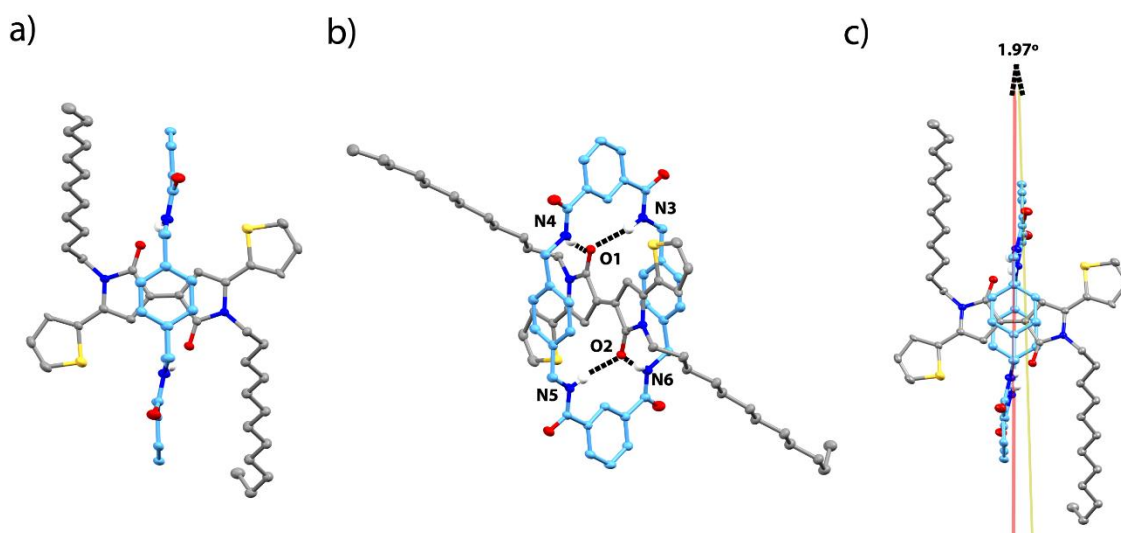

**Figure S15.** Molecular structure of **3b** with thermal ellipsoids drawn at 50% probability: a) lateral view; b) tilted view; c) lateral view, with intersection (angle) between two calculated planes at the macrocycle (in red: plane between carbons C50, C53, C66 and C69 of the *p*-xylylenediamine walls; in yellow: plane between carbons C42-C47 of the isophthalamide moiety). For clarity, selected hydrogens atoms have been deleted.

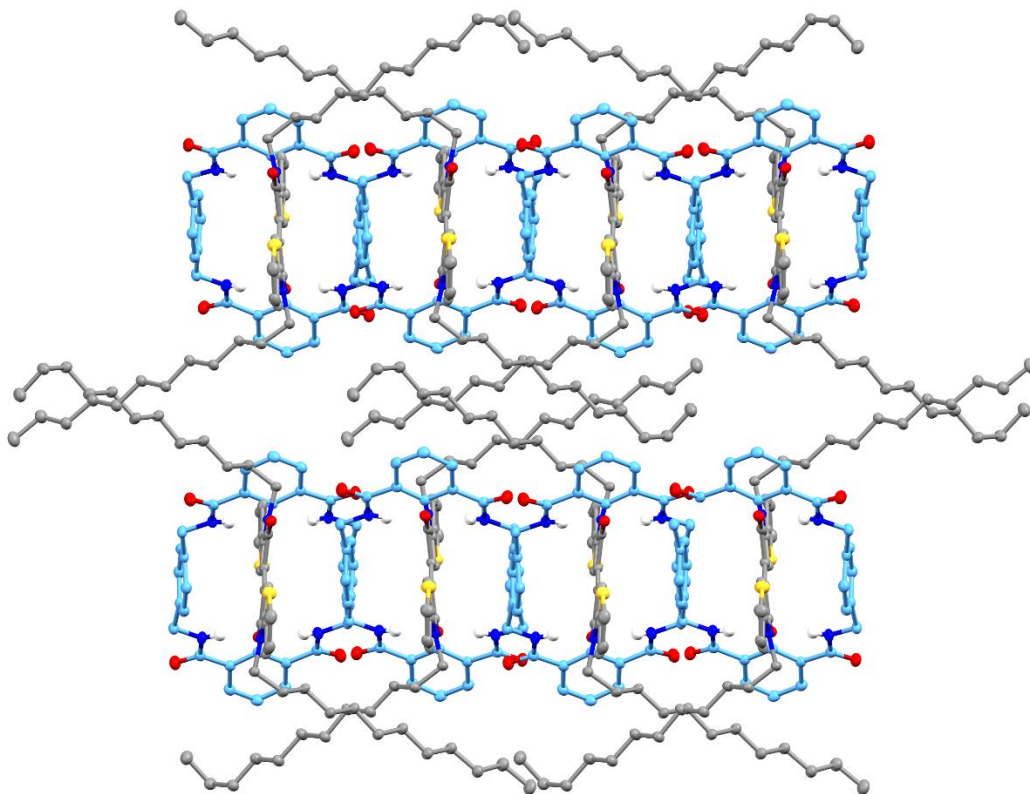

**Figure S16.** Packing of rotaxane **3b** view along the a-axis. For clarity, selected hydrogens atoms have been deleted.

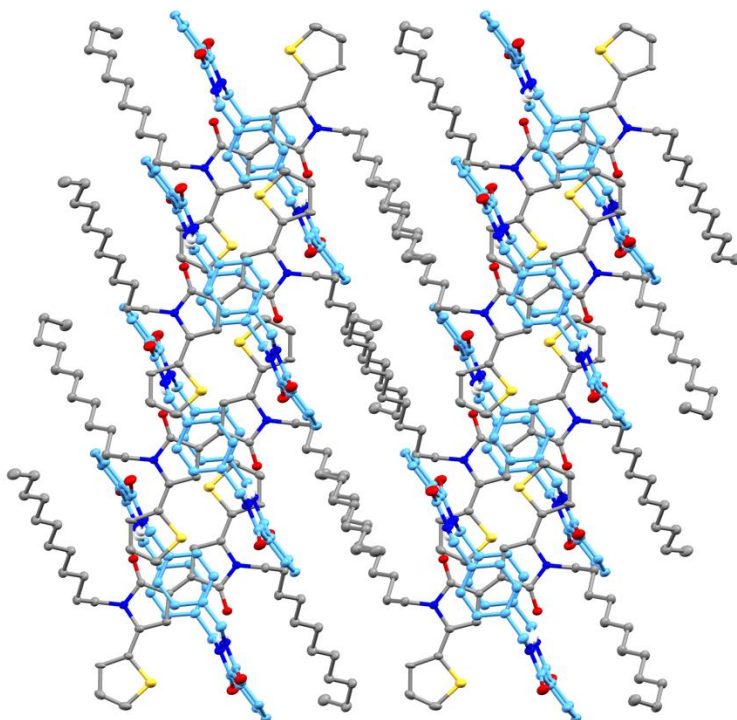

**Figure S17.** Packing of rotaxane **3b** view along the b-axis. For clarity, selected hydrogens atoms have been deleted.

### Rotaxane 3c

Single crystals of  $C_{58}H_{56}Cl_6N_6O_6S_2$  [II\_GCF\_69\_pentano\_0msp] were obtained by slow diffusion of *n*-pentane in a solution of  $CHCl_3$ . Intensities were registered at low temperature (100.0 K) on a Bruker D8 QUEST system equipped with a multilayer monochromator and a Mo K $\alpha$  Incoatec microfocussing sealed tube ( $\lambda = 0.71073 \text{ \AA}$ ). Absorption corrections were based on multi-scans (program SADABS). Using Olex2,<sup>6</sup> the structure was solved with the SHELXT<sup>7</sup> structure solution program using Intrinsic Phasing and refined with the SHELXL<sup>8, 9</sup> refinement package using Least Squares minimization. Hydrogen atoms were included using a riding model. One molecule of chloroform is included in the unit cell. The structure was deposited with CSD (deposition number CCDC 2335404).

**Table S3.** Crystal data and structure refinement for **3c**.

|                                          |                                    |
|------------------------------------------|------------------------------------|
| Empirical formula                        | $C_{58}H_{56}Cl_6N_6O_6S_2$        |
| Formula weight                           | 1209.90                            |
| $T$ [K]                                  | 100(2)                             |
| Wavelength [ $\text{\AA}$ ]              | 0.71073                            |
| Crystal system                           | Monoclinic                         |
| Space group                              | $P2_1/c$                           |
| $a$ ( $\text{\AA}$ )                     | 10.1581(8)                         |
| $b$ ( $\text{\AA}$ )                     | 15.8205(13)                        |
| $c$ ( $\text{\AA}$ )                     | 18.1159(15)                        |
| $\alpha$ ( $^\circ$ )                    | 90                                 |
| $\beta$ ( $^\circ$ )                     | 90.355(3)                          |
| $\gamma$ ( $^\circ$ )                    | 90                                 |
| $V$ [ $\text{\AA}^3$ ]                   | 2911.3(4)                          |
| $Z$                                      | 2                                  |
| $\rho$ [ $\text{g}\cdot\text{cm}^{-3}$ ] | 1.380                              |
| $\mu$ [ $\text{mm}^{-1}$ ]               | 0.422                              |
| $F_{000}$                                | 1256.0                             |
| Crystal size [ $\text{mm}^3$ ]           | 0.08 x 0.07 x 0.05                 |
| $2\theta$ range ( $^\circ$ )             | 3.418 to 52.74                     |
| $h$                                      | -12 to 12                          |
| $k$                                      | -19 to 19                          |
| $l$                                      | -22 to 22                          |
| Reflections collected                    | 51878                              |
| Independent reflections                  | 5950                               |
| R(int)                                   | 0.0617                             |
| Refinement method                        | Full-matrix least-squares on $F^2$ |

|                                          |            |
|------------------------------------------|------------|
| Parameters                               | 361        |
| Restraints                               | 0          |
| Goodness-of-fit on $F^2$                 | 1.080      |
| $R1$ [ $I > 2\sigma(I)$ ]                | 0.0519     |
| $wR2$ [ $I > 2\sigma(I)$ ]               | 0.1296     |
| $R1$ (all data)                          | 0.0774     |
| $wR2$ (all data)                         | 0.1547     |
| $\Delta\rho$ [ $e\cdot\text{\AA}^{-3}$ ] | 1.07/-0.52 |

**Table S4.** Hydrogen bonds for rotaxane **3c** [ $\text{\AA}$  and ( $^\circ$ )].

| D-H...A                        | d(D-H)  | d(H...A) | d(D...A) | $\angle(\text{DHA})$ |
|--------------------------------|---------|----------|----------|----------------------|
| N(2)-H(02)...O(1) <sup>1</sup> | 0.85(4) | 2.10(4)  | 2.918(3) | 164(3)               |
| N(3)-H(03)...O(1) <sup>1</sup> | 0.88(4) | 2.16(4)  | 3.039(3) | 171(3)               |
| C1S-H1S...O(3) <sup>2</sup>    | 1.00    | 2.12     | 3.027(4) | 150.4                |

<sup>1</sup> 1-X,1-Y,1-Z; <sup>2</sup> 1-X,-1/2+Y,1/2-Z

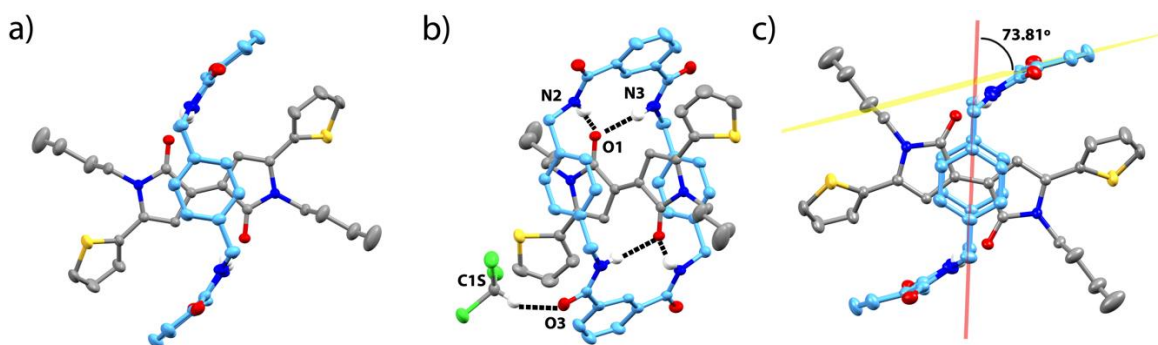

**Figure S18.** Molecular structure of **3c** with thermal ellipsoids drawn at 50% probability: a) lateral view; b) tilted view; c) lateral view, with intersection (angle) between two calculated planes at the macrocycle (in red: plane between carbons C15 and C18 of the *p*-xylylenediamine walls; in yellow: plane between carbons C21-C26 of the isophthalamide moiety). For clarity, selected hydrogens atoms have been deleted.

## 6. Determination of $\Delta G^\ddagger$ for the pirouetting of the macrocycle in 3a and 3c

### 6a. VT-NMR study of rotaxane 3c

From the coalescence temperature value, the rate constant ( $k_C$ ) was determined using Equation 1,<sup>10-12</sup> as well as the activation free energy ( $\Delta G^\ddagger$ ) by using the Eyring equation (Equation 2).

$$k_C = \frac{\pi \cdot \sqrt{\Delta\nu^2 + J_{AB}^2}}{\sqrt{2}} \quad (1)$$

$$\Delta G^\ddagger = -R \cdot T_C \cdot \ln \frac{k_C \cdot h}{k_B \cdot T_C} \quad (2)$$

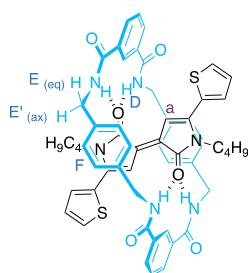

$$T_C = 402 \text{ K (129 } ^\circ\text{C)}$$

$$k_C = 1107 \text{ s}^{-1}$$

$$\Delta G^\ddagger = 75.1 \text{ KJ/mol (18.0 Kcal/mol)}$$

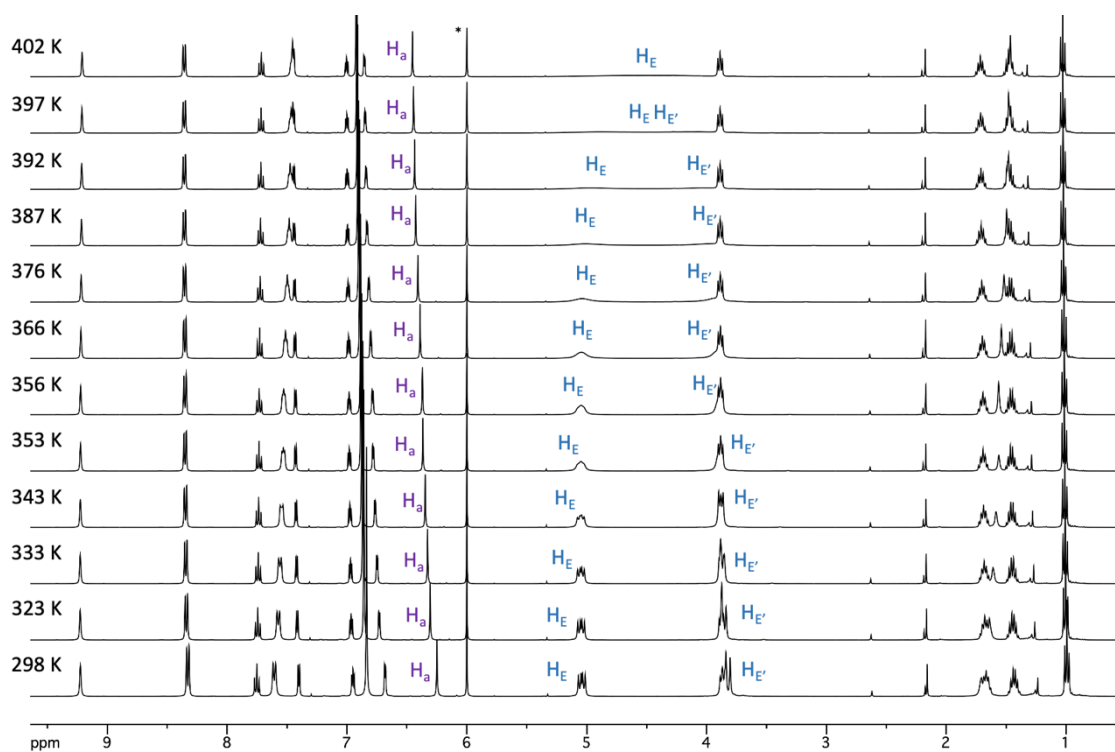

**Figure S19.**  $^1\text{H-NMR}$  ( $\text{C}_2\text{D}_2\text{Cl}_4$ , 400 MHz) spectra of rotaxane **3c** measured at different temperatures; the asterisk corresponds to the solvent residual peak.

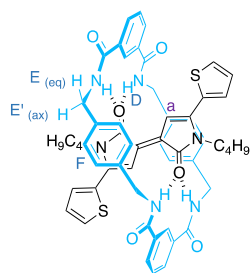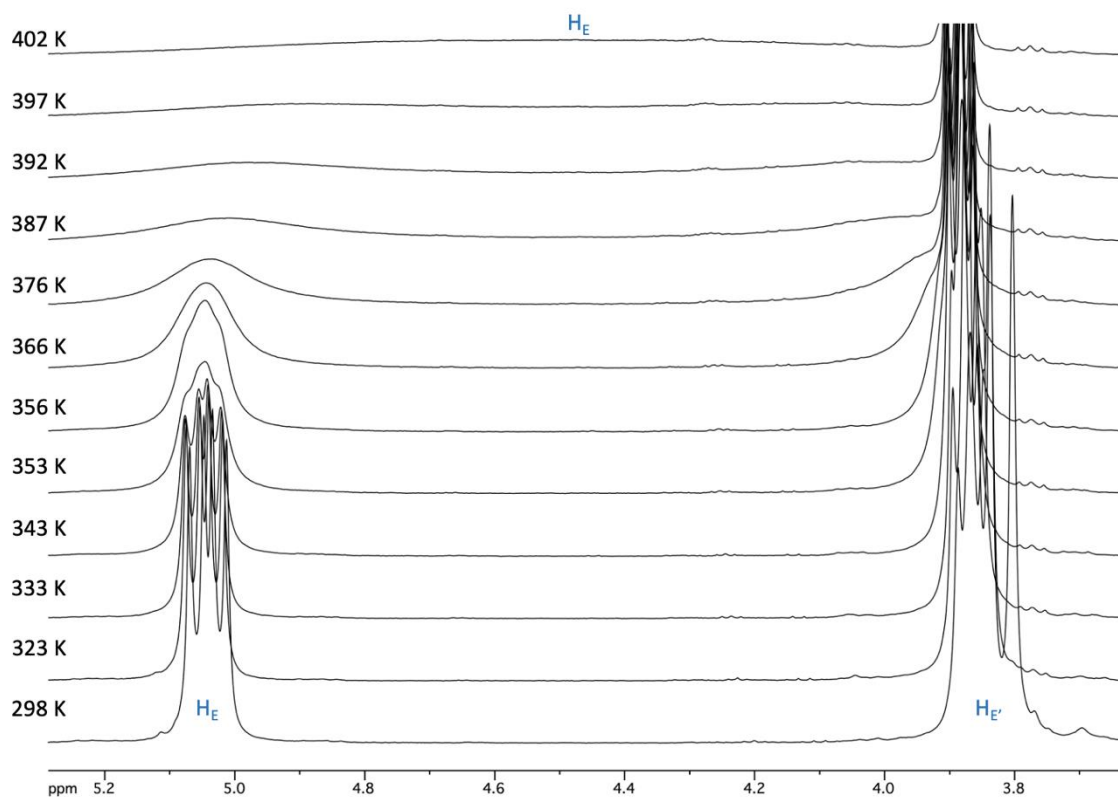

**Figure S20.** Expanded view of the resonance peaks for protons  $H_E$  and  $H_{E'}$  in the  $^1\text{H}$ -NMR ( $\text{C}_2\text{D}_2\text{Cl}_4$ , 400 MHz) spectra of rotaxane **3c** measured at different temperatures.

## 6b. VT-NMR study of rotaxane 3a

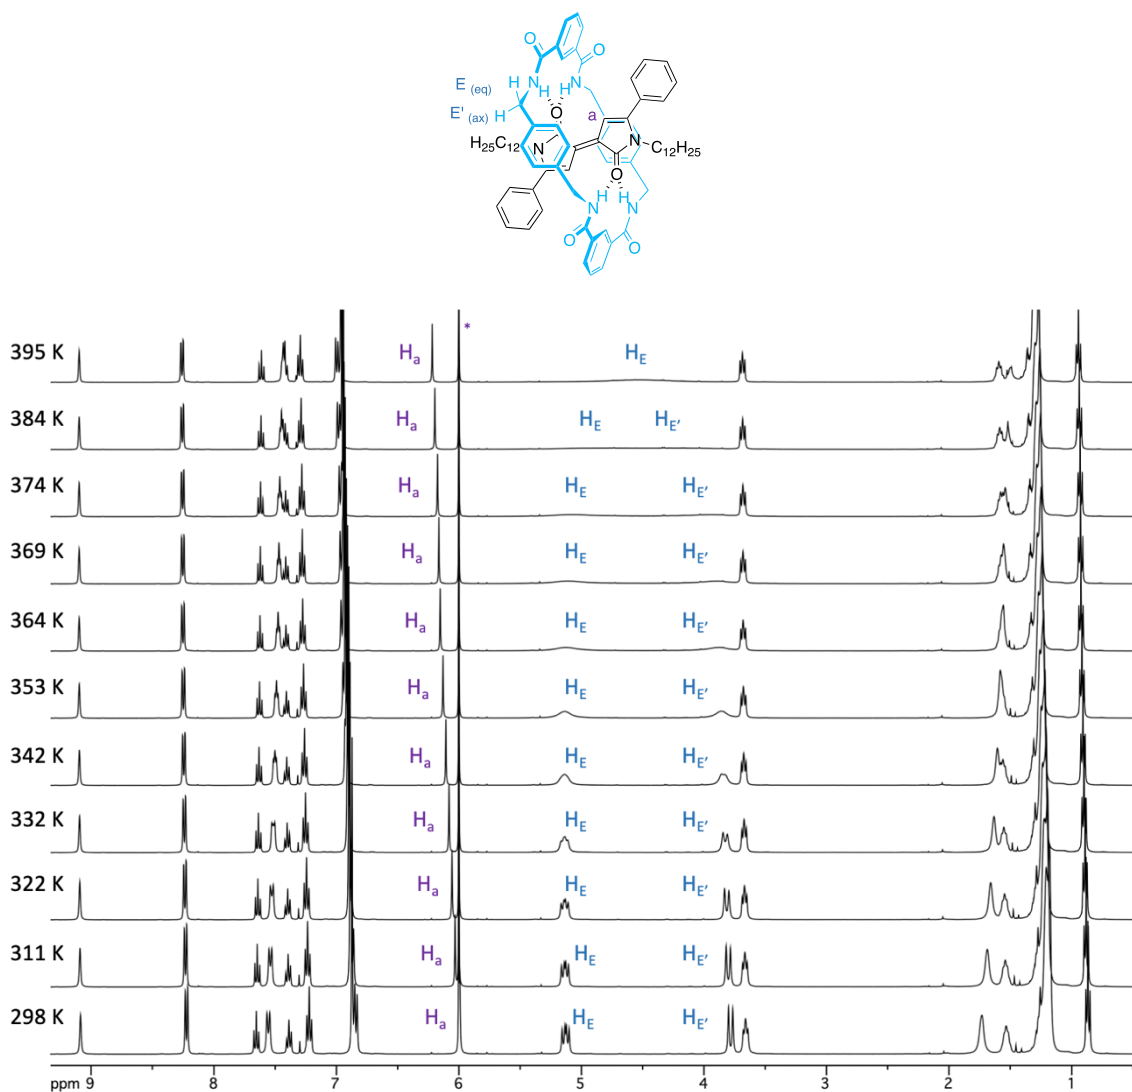

**Figure S21.** <sup>1</sup>H-NMR (C<sub>2</sub>D<sub>2</sub>Cl<sub>4</sub>, 400 MHz) spectra of rotaxane **3a** measured at different temperatures; the asterisk corresponds to the solvent residual peak.

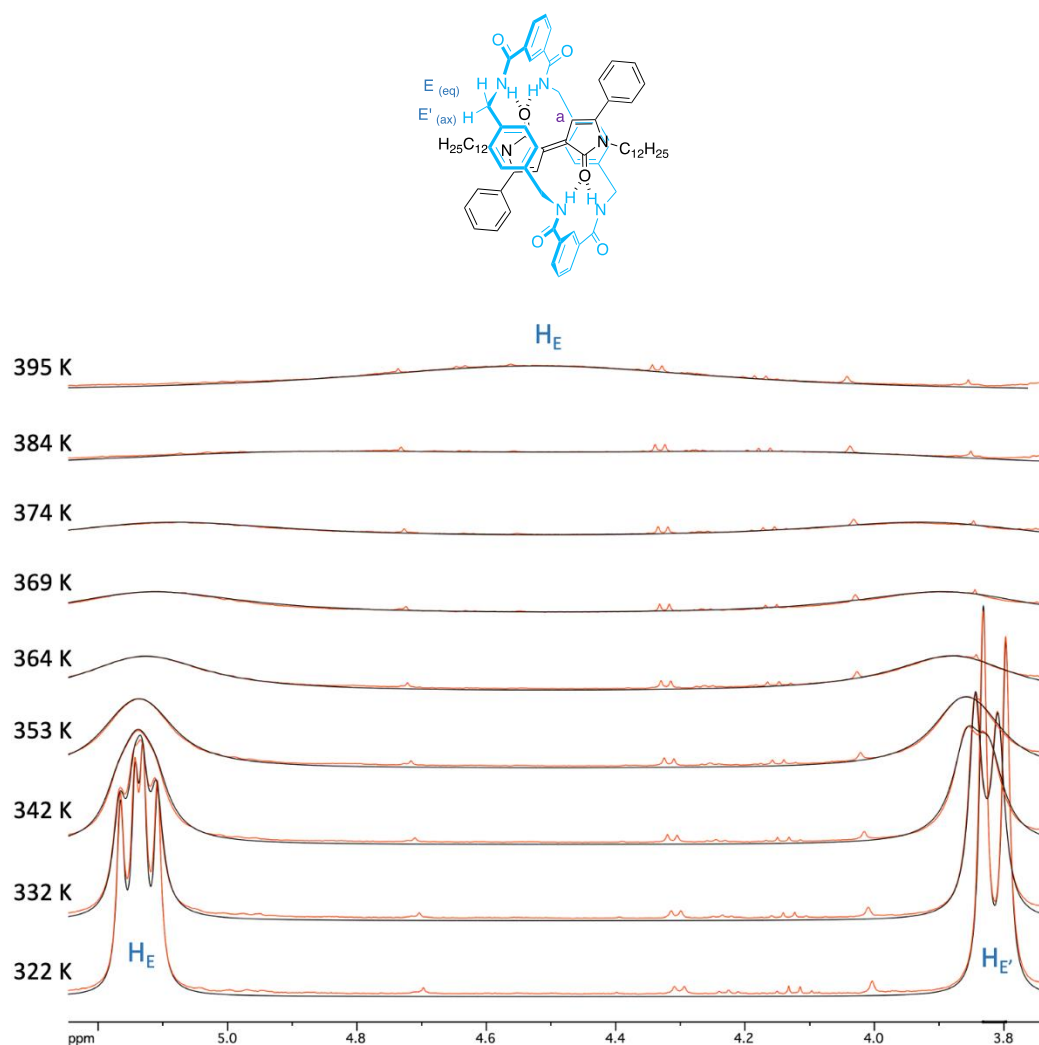

**Figure S22.** Simulated (black) and experimental (red)  $^1\text{H-NMR}$  ( $\text{C}_2\text{D}_2\text{Cl}_4$ , 400 MHz) spectra of rotaxane **3a** used for the determination of the activation parameters.

**Table S5.** Rate constants determined by line shape analysis at different temperatures for the circumrotation of the macrocycle in **3a**.

| Entry | $T$ (K) | $k$ ( $\text{s}^{-1}$ ) | $1/T$      | $\ln(k/T)$ |
|-------|---------|-------------------------|------------|------------|
| 1     | 322     | 13.5                    | 0.00311090 | -3.1701523 |
| 2     | 332     | 26.2                    | 0.00301532 | -2.5382906 |
| 3     | 342     | 63.5                    | 0.00292543 | -1.6832736 |
| 4     | 353     | 128.8                   | 0.00282957 | -1.0093680 |
| 5     | 364     | 265.8                   | 0.00274922 | -0.3136576 |
| 6     | 369     | 417.3                   | 0.00271076 | 0.12327978 |
| 7     | 374     | 541.5                   | 0.00267330 | 0.36990012 |
| 8     | 384     | 988.0                   | 0.00260146 | 0.94399902 |
| 9     | 395     | 1886.3                  | 0.00253331 | 1.56414520 |



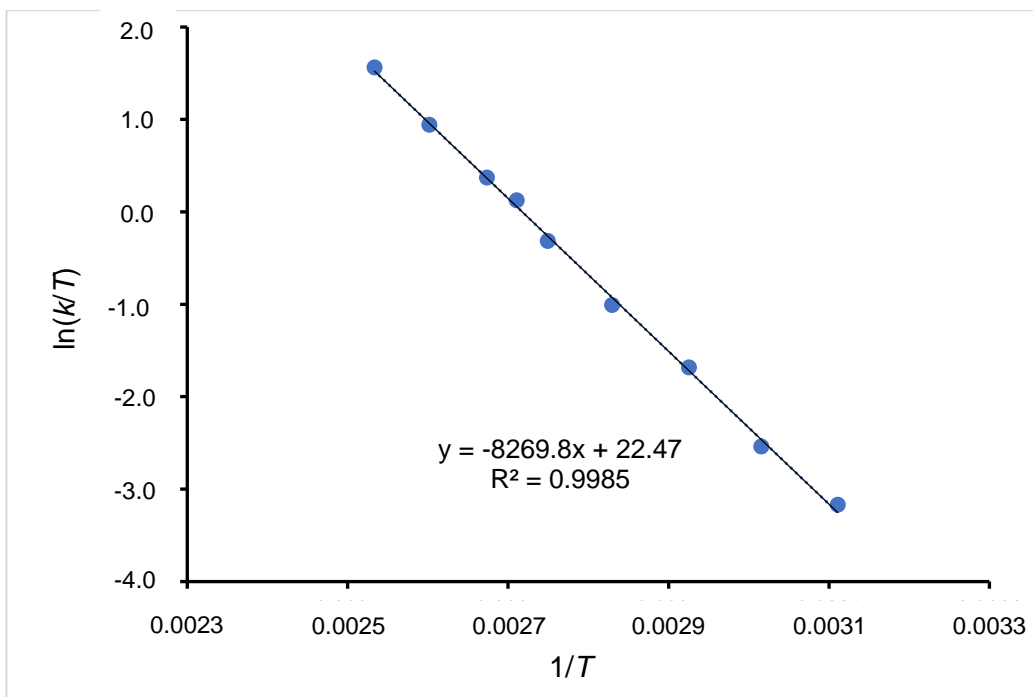

**Figure S23.** Eyring plot for the pirouetting of the macrocycle in **3a**.

$\Delta H^\ddagger$  and  $\Delta S^\ddagger$  were calculated from the slope and intercept using equation (5).<sup>13</sup>

$$\Delta G^\ddagger = -RT \ln \frac{kh}{k_b T} = -RT \left( \ln \frac{h}{k_b} + \ln \frac{k}{T} \right) = RT \left( \ln \frac{k_b}{h} - \ln \frac{k}{T} \right) \quad (3)$$

$$\Delta G^\ddagger = \Delta H^\ddagger - T \Delta S^\ddagger \quad (4)$$

$$\ln \frac{k}{T} = 23.76 - \frac{\Delta H^\ddagger}{RT} + \frac{\Delta S^\ddagger}{R} \quad (5)$$

$h$ ,  $k_b$  and  $R$  are the Planck, Boltzmann and gas constants, respectively.

**Table S6.** Activation parameters for the pirouetting of the macrocycle around **3a**.

| Entry | $\Delta H^\ddagger$         | Standard deviation          | $\Delta S^\ddagger$                       | Standard deviation                      |
|-------|-----------------------------|-----------------------------|-------------------------------------------|-----------------------------------------|
| 1     | 68.8 KJ mol <sup>-1</sup>   | 1.0 KJ mol <sup>-1</sup>    | -10.7 J mol <sup>-1</sup> K <sup>-1</sup> | 2.8 J mol <sup>-1</sup> K <sup>-1</sup> |
| 2     | 16.5 Kcal mol <sup>-1</sup> | 0.24 Kcal mol <sup>-1</sup> | -2.6 e.u.                                 | 0.7 e. u.                               |

## 7. Thermolysis of aza-Pechmann dyes **2b-c** and rotaxanes **3b-c** in solution

### Thermolysis of **2b**

A solution of thread **2b** (5.1 mg, 0.0076 mmol) and durene (1.1 mg, 0.0082 mmol) as internal standard in  $C_2D_2Cl_4$  (0.5 mL) was heated at 120 °C (oil bath). The amount of **2b** respect to the internal standard was quantified by  $^1H$ -NMR spectroscopy. Unfortunately, due to the presence of a complex mixture of products from the third day of monitoring, the amount of free dye could not be accurately quantified.

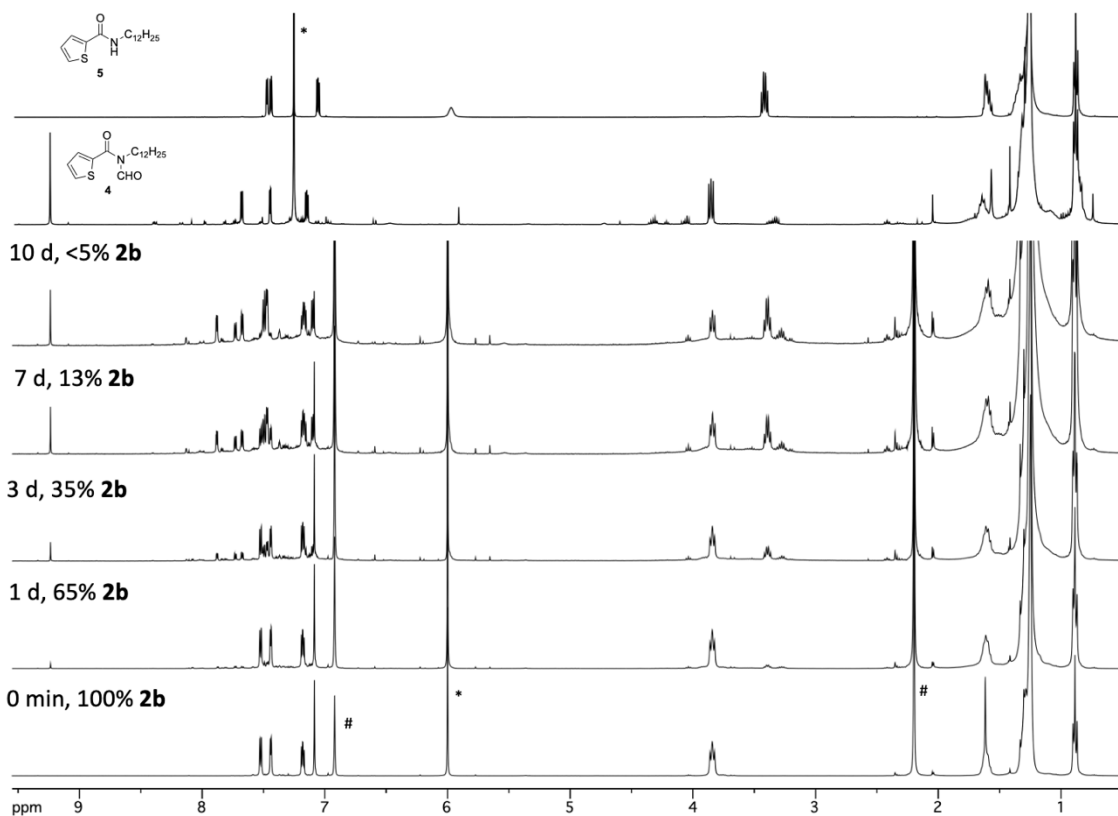

**Figure S24.**  $^1H$ -NMR (400 MHz) spectra of the free dye **2b** after heating at 120 °C ( $C_2D_2Cl_4$ ) at different times, and  $^1H$ -NMR (400 MHz) spectra of **4** and **5** ( $CDCl_3$ ); asterisks (\*) represent residual solvent peaks and hash signs (#) indicate the two resonances of durene (internal standard).

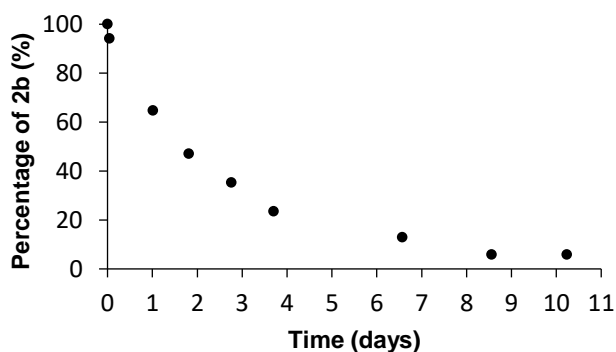

**Figure S25.** Percentage of the amount of **2b** respect to the internal standard over time.

Thermolysis of **2b** was reproduced on a larger scale with the aim of isolating any product resulting from its decomposition. For this purpose, a solution of **2b** (75 mg, 0.113 mmol) in C<sub>2</sub>H<sub>2</sub>Cl<sub>4</sub> (7.6 mL) was kept at 120 °C. After 8 days (no dye was detected by TLC) the solvent was removed under reduced pressure and the crude product was purified by column chromatography on silica gel eluting with 50:1 to 20:1 CHCl<sub>3</sub>/acetone to give *N*-dodecyl-*N*-formylthiophene-2-carboxamide (**4**) and *N*-dodecylthiophene-2-carboxamide (**5**).<sup>14</sup>

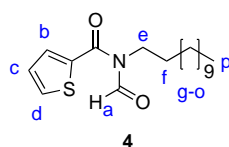

*N*-Dodecyl-*N*-formylthiophene-2-carboxamide (**4**) (*R<sub>f</sub>* = 0.49 in 20:1 CHCl<sub>3</sub>/acetone): 9.1 mg (13%); <sup>1</sup>H NMR (400 MHz, CDCl<sub>3</sub>, 298 K) δ 9.25 (s, 1H, H<sub>a</sub>), 7.69 (dd, *J* = 5.0, 1.1 Hz, 1H, H<sub>d</sub>), 7.45 (dd, *J* = 3.8, 1.1 Hz, 1H, H<sub>b</sub>), 7.16 (dd, *J* = 5.0, 3.8 Hz, 1H, H<sub>c</sub>), 3.87-3.84 (m, 2H, H<sub>e</sub>), 1.68 – 1.61 (m, 2H, H<sub>f</sub>), 1.34 – 1.25 (m, 18H, H<sub>g-o</sub>), 0.88 (t, *J* = 6.9 Hz, 3H, H<sub>p</sub>); <sup>13</sup>C NMR (75 MHz, CDCl<sub>3</sub>, 298 K) δ 165.5 (CO), 163.9 (CHO), 136.6 (C), 133.3 (CH), 133.1 (CH), 127.8 (CH), 41.7 (CH<sub>2</sub>), 32.1 (CH<sub>2</sub>), 29.9 (CH<sub>2</sub>), 29.8 (CH<sub>2</sub>), 29.71 (CH<sub>2</sub>), 29.65 (CH<sub>2</sub>), 29.5 (CH<sub>2</sub>), 29.4 (CH<sub>2</sub>), 28.2 (CH<sub>2</sub>), 27.1 (CH<sub>2</sub>), 22.8 (CH<sub>2</sub>), 14.3 (CH<sub>3</sub>); HRMS (ESI) calcd for C<sub>18</sub>H<sub>30</sub>NO<sub>2</sub>S [M + H]<sup>+</sup> 324.1992, found 324.1993.

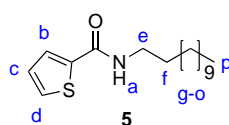

*N*-Dodecylthiophene-2-carboxamide (**5**) (*R<sub>f</sub>* = 0.37 in 20:1 CHCl<sub>3</sub>/acetone): 13.7 mg (20%); <sup>1</sup>H NMR (400 MHz, CDCl<sub>3</sub>, 298 K) δ 7.48 (d, *J* = 3.7 Hz, 1H, H<sub>b</sub>), 7.45 (dd, *J* = 5.0, 1.1 Hz, 1H, H<sub>d</sub>), 7.06 (dd, *J* = 5.0, 3.7 Hz, 1H, H<sub>c</sub>), 5.98 (s, 1H, H<sub>a</sub>), 3.44-3.39 (m, 2H, H<sub>e</sub>), 1.63 – 1.56 (m, 2H, H<sub>f</sub>), 1.37 – 1.25 (m, 18H, H<sub>g-o</sub>), 0.88 (t, *J* = 6.8 Hz, 3H, H<sub>p</sub>); <sup>13</sup>C NMR (75 MHz, CDCl<sub>3</sub>, 298 K) δ 162.0 (CO), 139.3 (C), 129.7 (CH), 127.9 (CH), 127.7 (CH), 40.2 (CH<sub>2</sub>), 32.1 (CH<sub>2</sub>), 29.9 (CH<sub>2</sub>), 29.8 (CH<sub>2</sub>), 29.73 (CH<sub>2</sub>), 29.69 (CH<sub>2</sub>), 29.49 (CH<sub>2</sub>), 29.47 (CH<sub>2</sub>), 27.1 (CH<sub>2</sub>), 22.8 (CH<sub>2</sub>), 14.3 (CH<sub>3</sub>); HRMS (ESI) calcd for C<sub>17</sub>H<sub>30</sub>NOS [M + H]<sup>+</sup> 296.2043, found 296.2047.

## Thermolysis of **2c**

A solution of thread **2c** (3.3 mg, 0.0075 mmol) and durene (1.0 mg, 0.0075 mmol) as internal standard in  $C_2D_2Cl_4$  (0.5 mL) was heated at 120 °C (oil bath). The amount of **2c** respect to the internal standard was quantified by  $^1H$ -NMR spectroscopy. Unfortunately, due to the presence of a complex mixture of products from the third day of monitoring, the amount of free dye could not be accurately quantified.

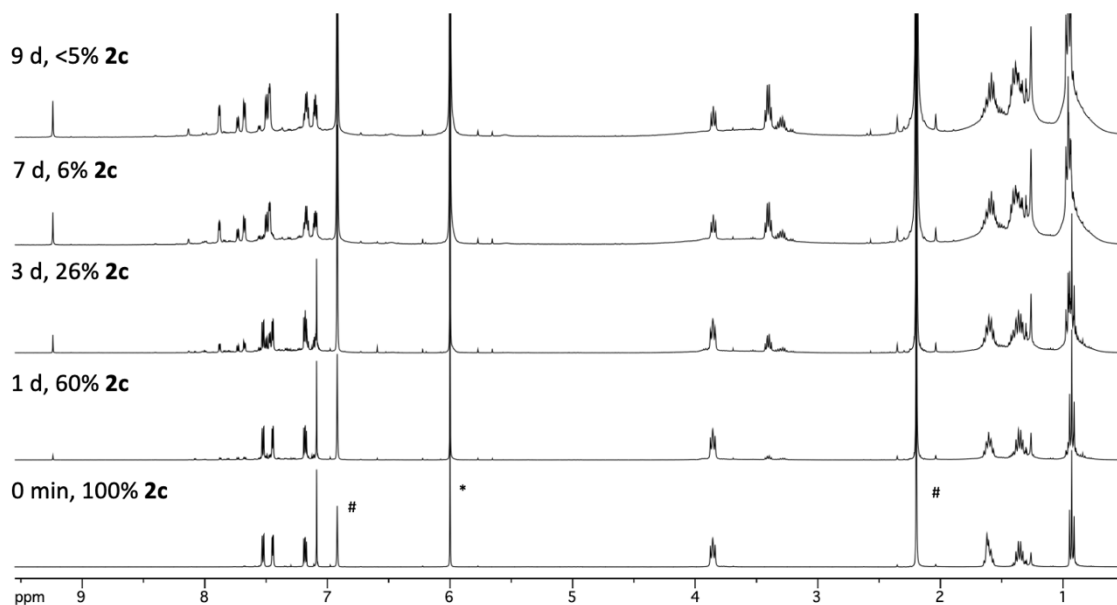

**Figure S26.**  $^1H$ -NMR (400 MHz) spectra of the free dye **2c** after heating at 120 °C ( $C_2D_2Cl_4$ ) at different times; the asterisk (\*) represents the residual solvent peak and hash signs (#) indicate the two resonances of durene (internal standard).

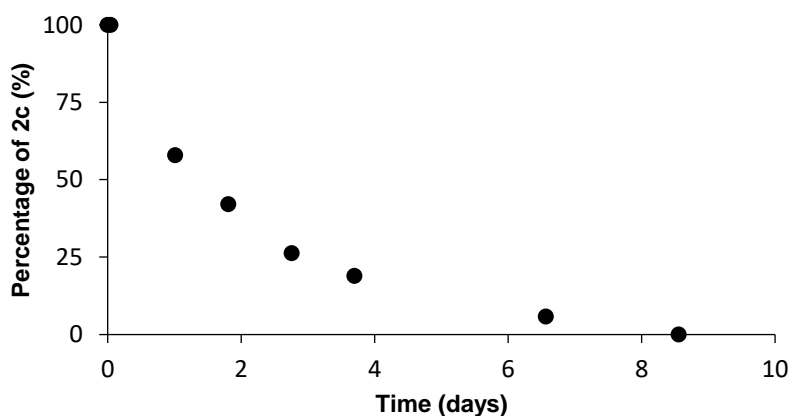

**Figure S27.** Percentage of the amount of **2c** respect to the internal standard over time.

## Thermolysis of **3b**

A solution of rotaxane **3b** (9 mg, 0.0075 mmol) and durene (1 mg, 0.0075 mmol) in  $C_2D_2Cl_4$  (0.5 mL) was heated at 120 °C (oil bath). The amount of **3b** respect to the internal standard was quantified by  $^1H$ -NMR spectroscopy.

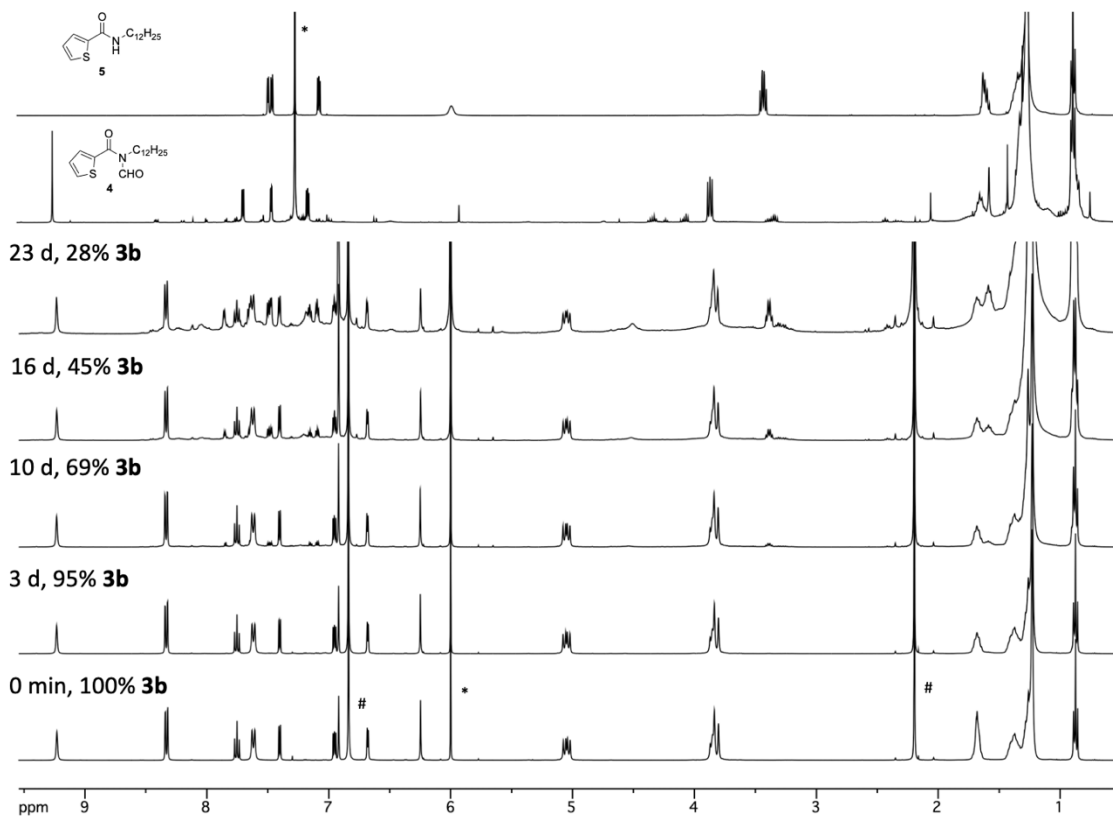

**Figure S28.**  $^1H$ -NMR (400 MHz) spectra of rotaxane **3b** after heating at 120 °C ( $C_2D_2Cl_4$ ) at different times, and  $^1H$ -NMR (400 MHz) spectra of **4** and **5** ( $CDCl_3$ ); asterisks (\*) represent residual solvent peaks and hash signs (#) indicate the two resonances of durene (internal standard).

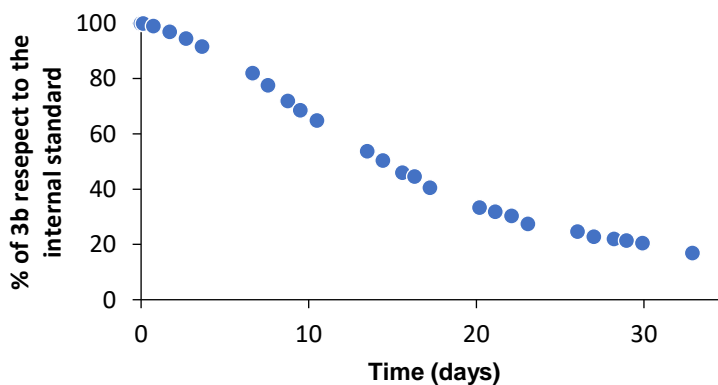

**Figure S29.** Percentage of the amount of **3b** respect to the internal standard over time.

### Thermolysis of **3c**

A solution of rotaxane **3c** (7.5 mg, 0.0077 mmol) and durene (1 mg, 0.0075 mmol) in  $C_2D_2Cl_4$  (0.5 mL) was heated at 120 °C (oil bath). The amount of **3c** respect to the internal standard was quantified by  $^1H$ -NMR spectroscopy.

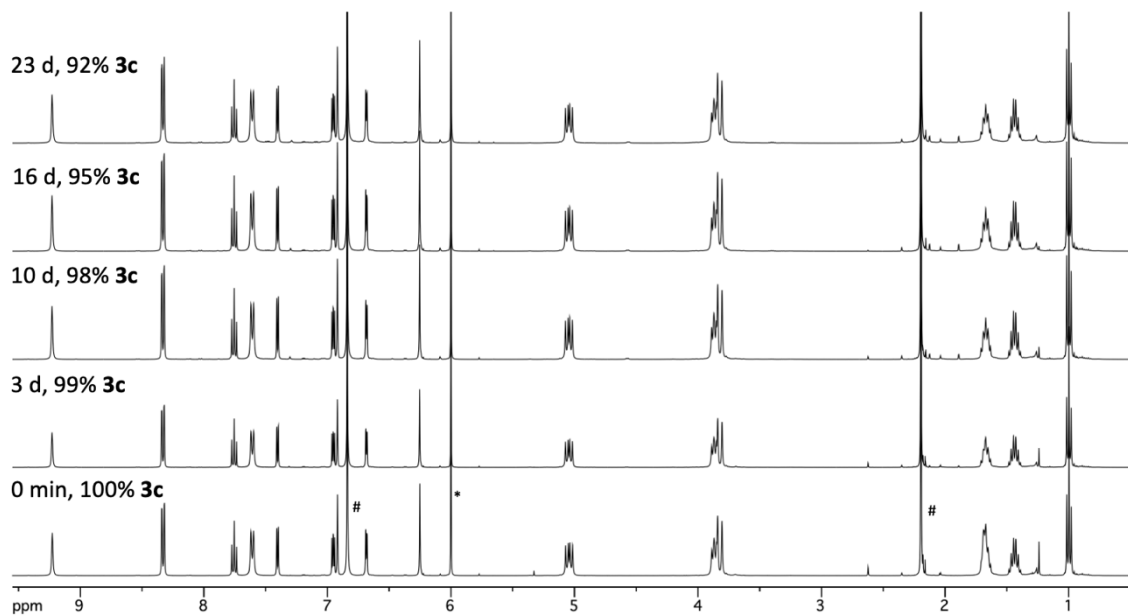

**Figure S30.**  $^1H$ -NMR (400 MHz) spectra of rotaxane **3c** after heating at 120 °C ( $C_2D_2Cl_4$ ) at different times; the asterisk (\*) represents the residual solvent peak and hash signs (#) indicate the two resonances of durene (internal standard).

## 8. TGA experiments of Pechmann lactams 2b-c and rotaxanes 3b-c

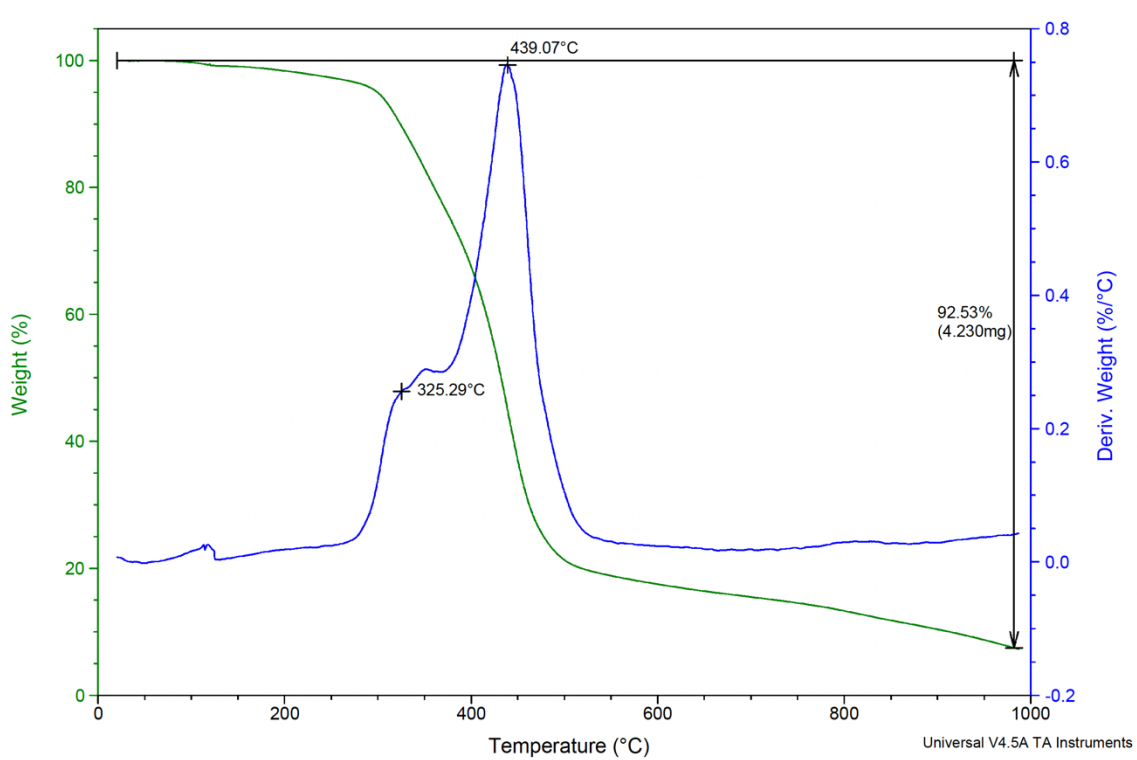

Figure S31. TGA experiment of Pechmann lactam 2b.

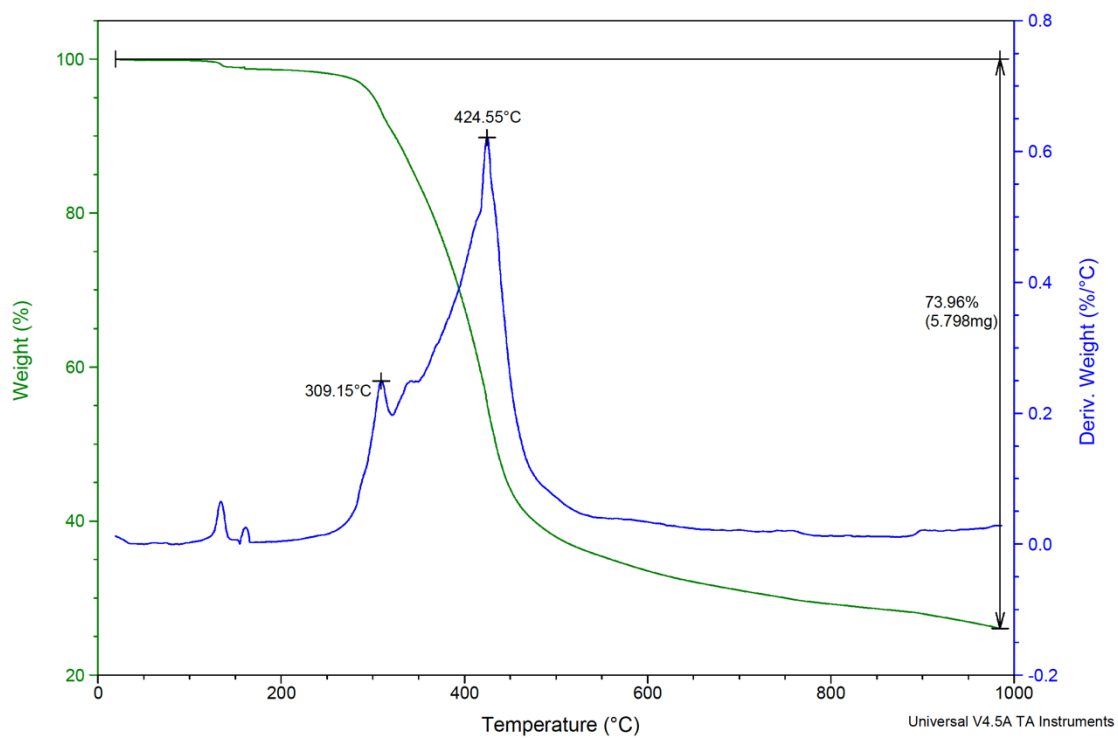

Figure S32. TGA experiment of Pechmann lactam 2c.

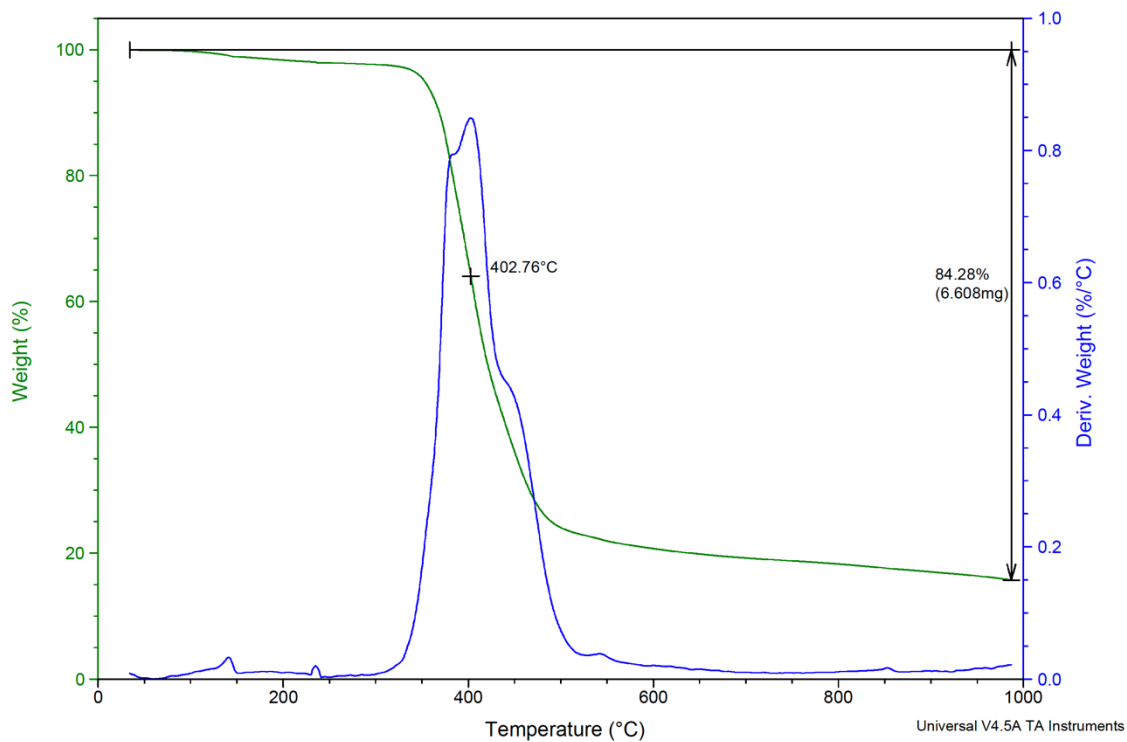

**Figure S33.** TGA experiment of rotaxane **3b**.

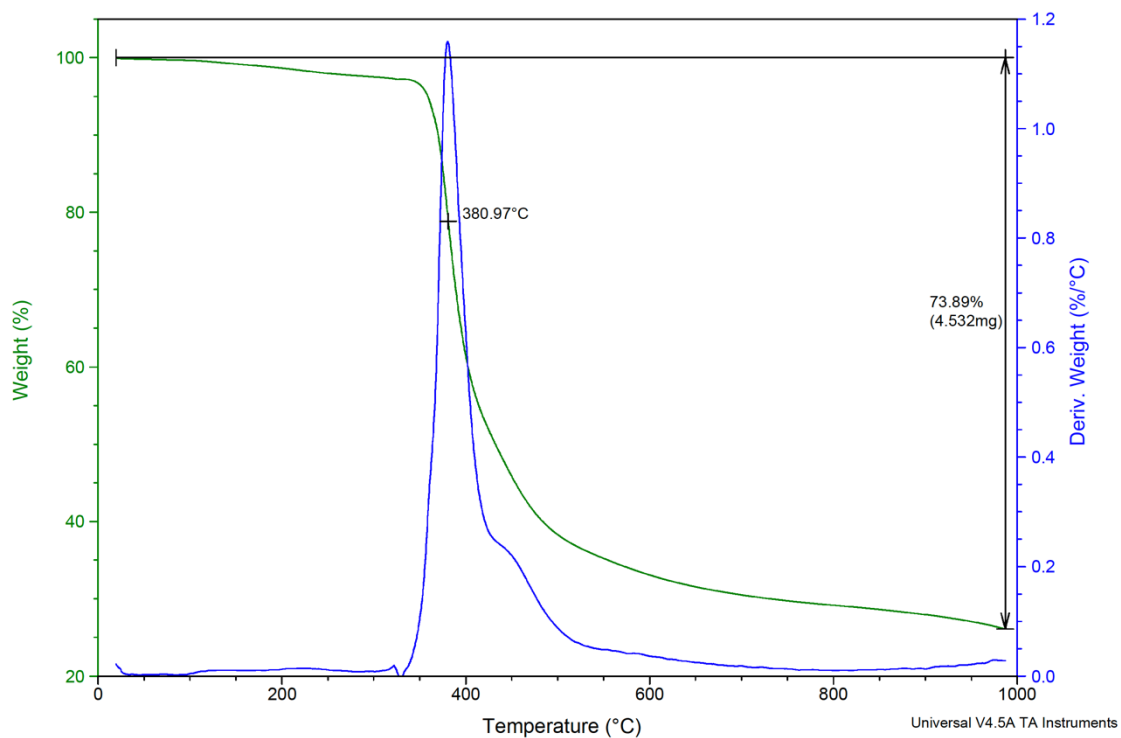

**Figure S34.** TGA experiment of rotaxane **3c**.



## 9. Ultraviolet-visible spectra of aza-Pechmann dyes 2 and rotaxanes 3

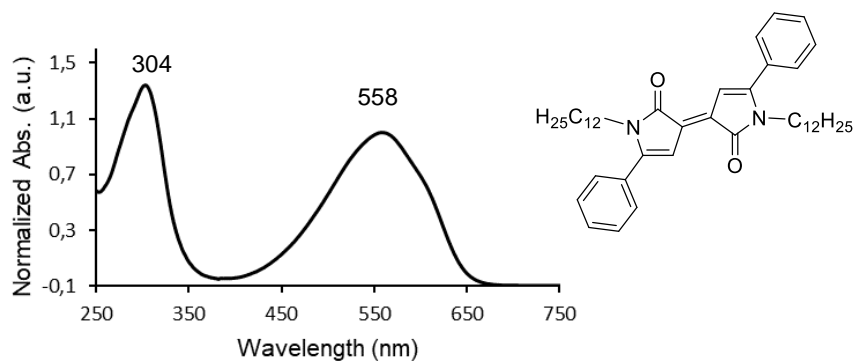

**Figure S35.** Absorption spectra of thread **2a** in chloroform ( $c \approx 1 \times 10^{-5}$  M).

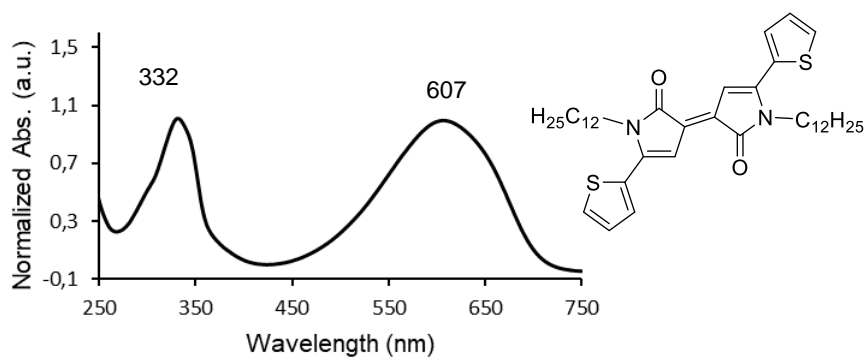

**Figure S36.** Absorption spectra of thread **2b** in chloroform ( $c \approx 1 \times 10^{-5}$  M).

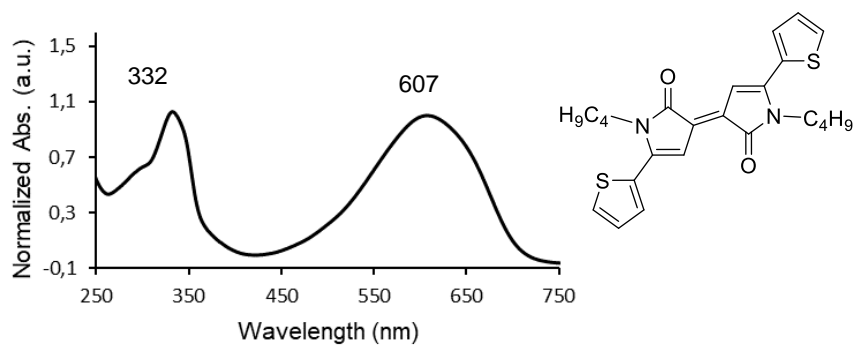

**Figure S37.** Absorption spectra of thread **2c** in chloroform ( $c \approx 1 \times 10^{-5}$  M).

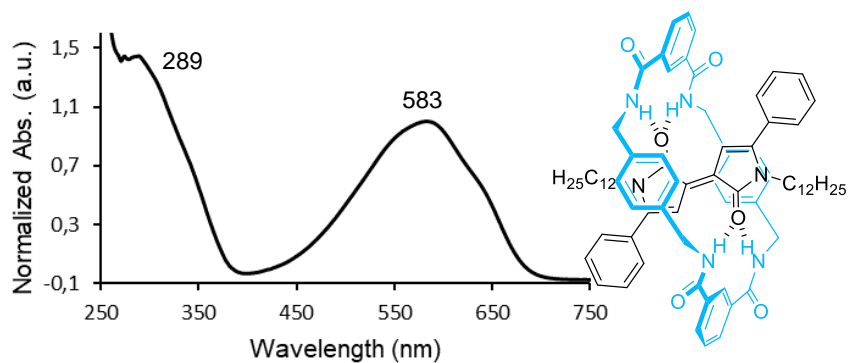

**Figure S38.** Absorption spectra of rotaxane **3a** in chloroform ( $c \approx 1 \times 10^{-5}$  M).

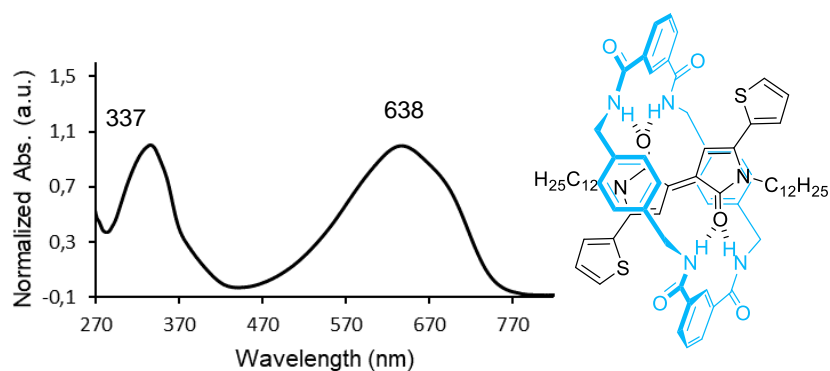

**Figure S39.** Absorption spectra of rotaxane **3b** in chloroform ( $c \approx 1 \times 10^{-5}$  M).

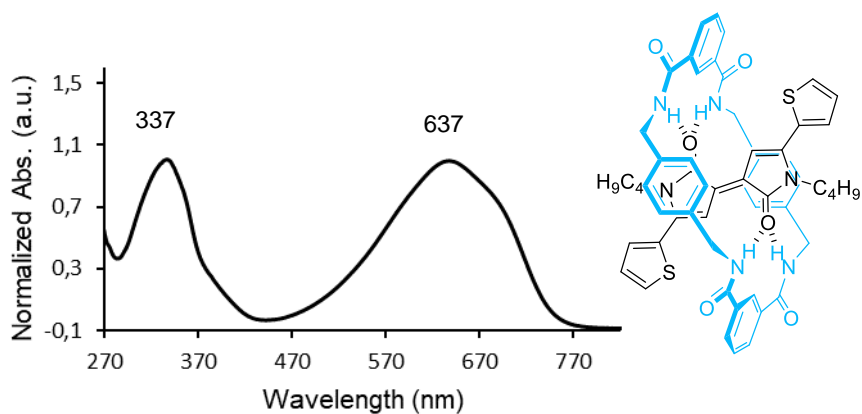

**Figure S40.** Absorption spectra of rotaxane **3c** in chloroform ( $c \approx 1 \times 10^{-5}$  M).

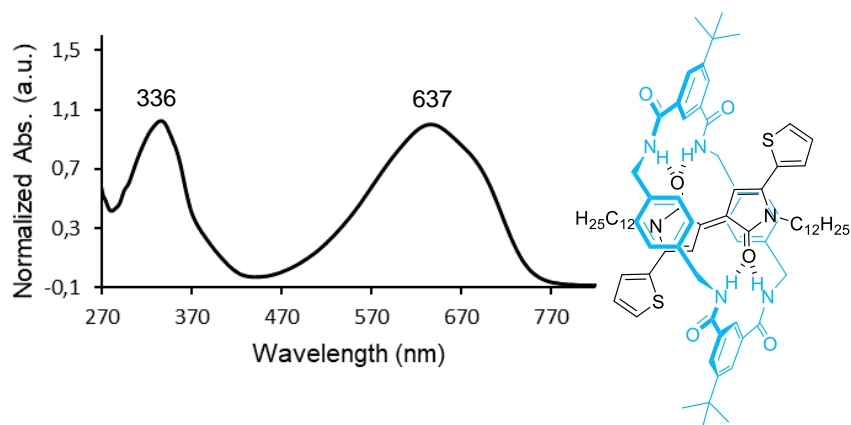

**Figure S41.** Absorption spectra of rotaxane **3f** in chloroform ( $c \approx 1 \times 10^{-5}$  M).

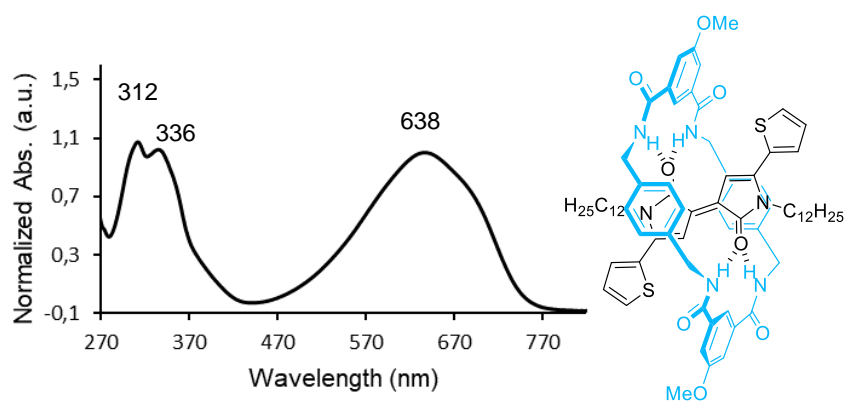

**Figure S42.** Absorption spectra of rotaxane **3g** in chloroform ( $c \approx 1 \times 10^{-5}$  M).

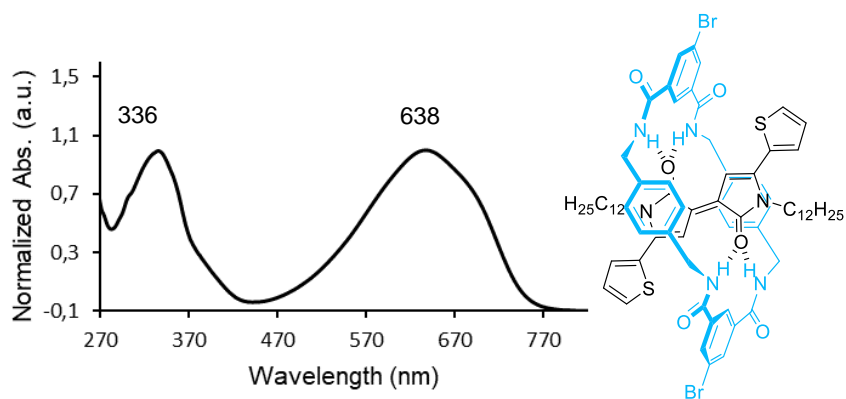

**Figure S43.** Absorption spectra of rotaxane **3h** in chloroform ( $c \approx 1 \times 10^{-5}$  M).

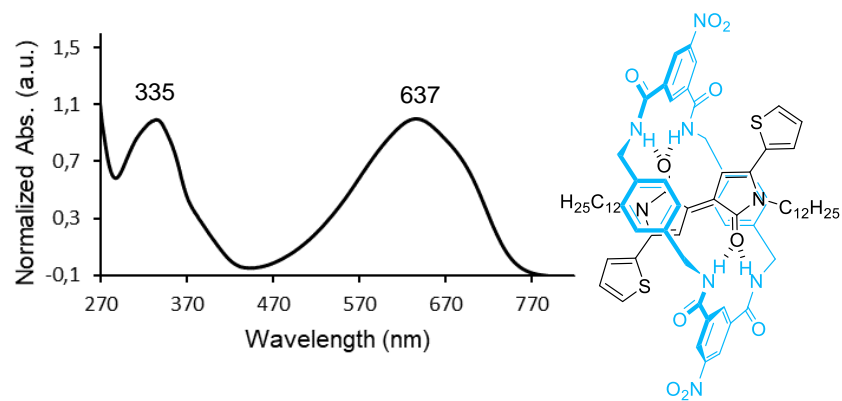

**Figure S44.** Absorption spectra of rotaxane **3i** in chloroform ( $c \approx 1 \times 10^{-5}$  M).

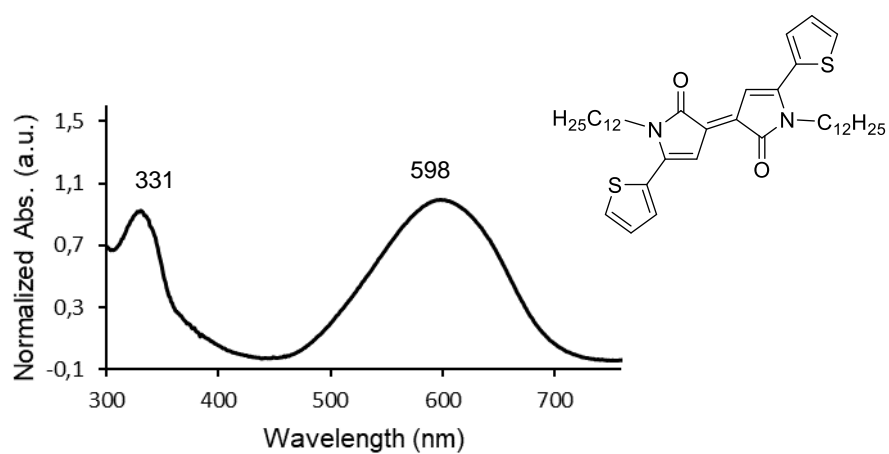

**Figure S45.** Absorption spectra of thread **2b** in methanol ( $c \approx 1 \times 10^{-5}$  M).

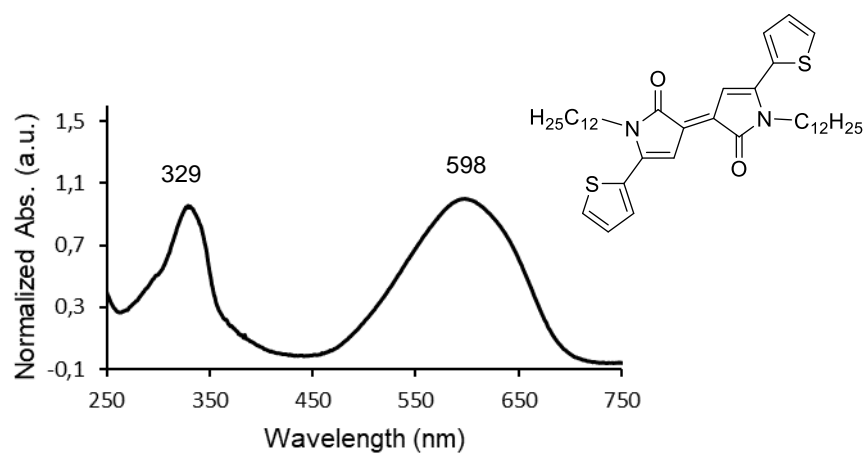

**Figure S46.** Absorption spectra of thread **2b** in acetonitrile ( $c \approx 1 \times 10^{-5}$  M).

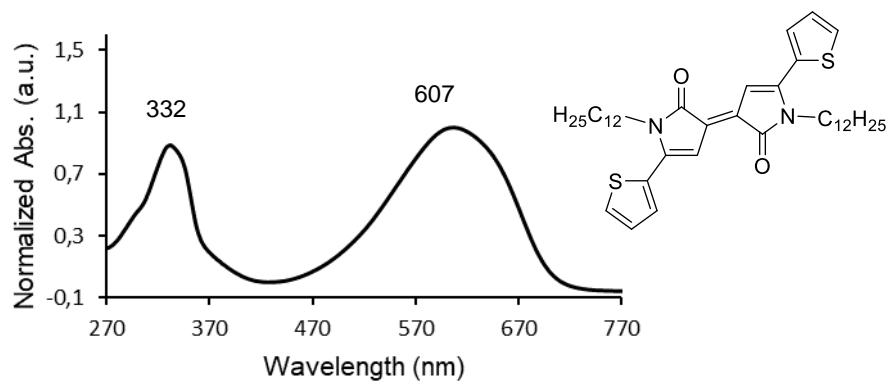

**Figure S47.** Absorption spectra of thread **2b** in DMF ( $c \approx 1 \times 10^{-5}$  M).

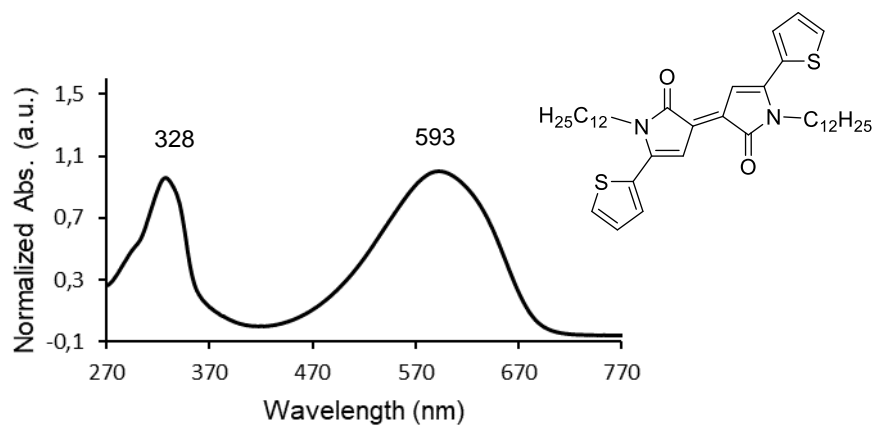

**Figure S48.** Absorption spectra of thread **2b** in ethyl acetate ( $c \approx 1 \times 10^{-5}$  M).

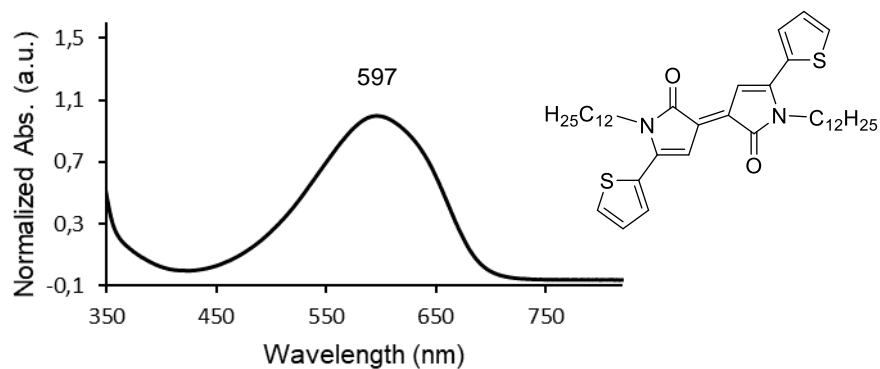

**Figure S49.** Absorption spectra of thread **2b** in acetone ( $c \approx 1 \times 10^{-5}$  M).

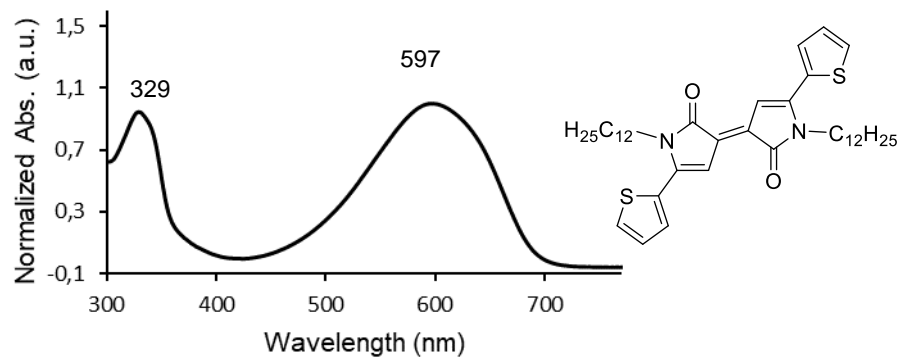

**Figure S50.** Absorption spectra of thread **2b** in tetrahydrofuran ( $c \approx 1 \times 10^{-5}$  M).

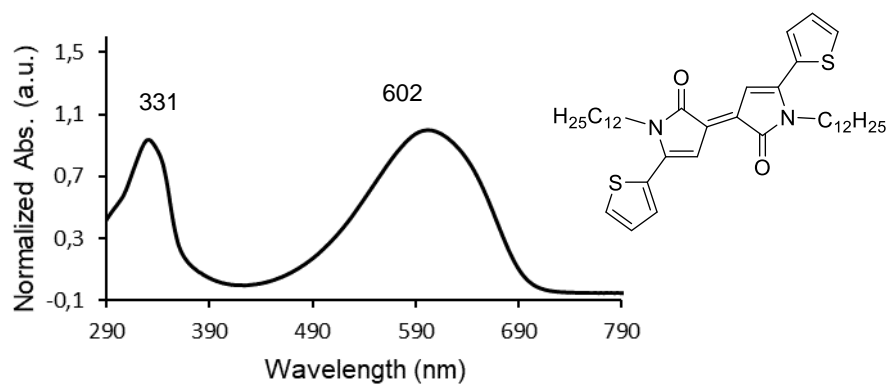

**Figure S51.** Absorption spectra of thread **2b** in toluene ( $c \approx 1 \times 10^{-5}$  M).

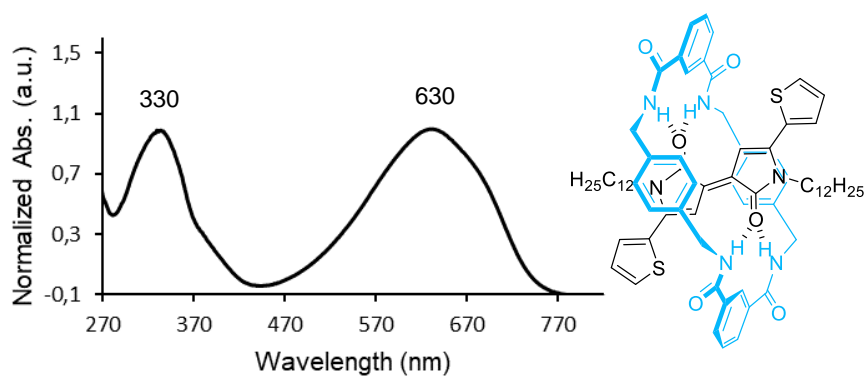

**Figure S52.** Absorption spectra of rotaxane **3b** in methanol ( $c \approx 1 \times 10^{-5}$  M).

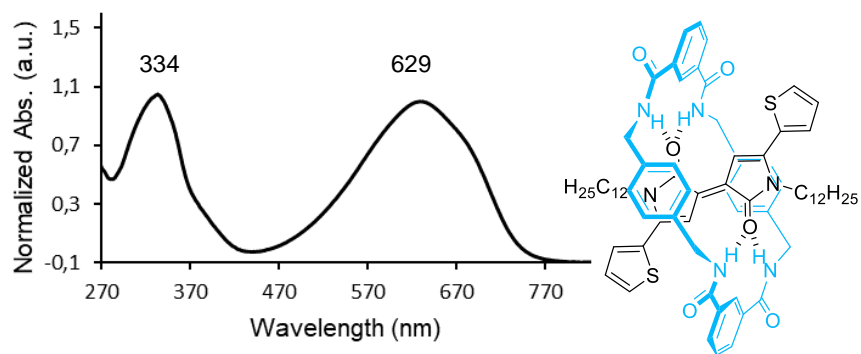

**Figure S53.** Absorption spectra of rotaxane **3b** in acetonitrile ( $c \approx 1 \times 10^{-5}$  M).

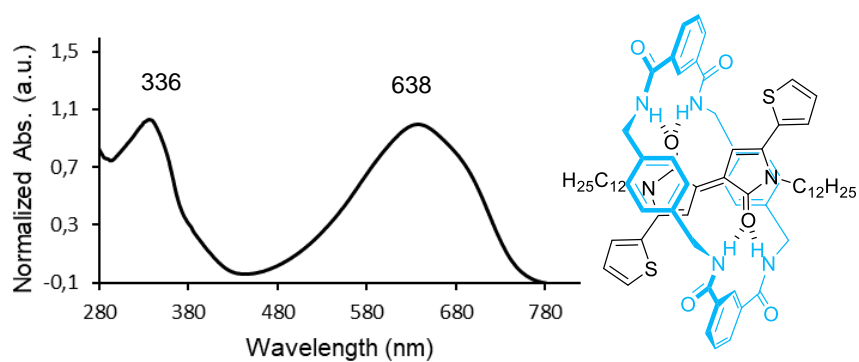

**Figure S54.** Absorption spectra of rotaxane **3b** in DMF ( $c \approx 1 \times 10^{-5}$  M).

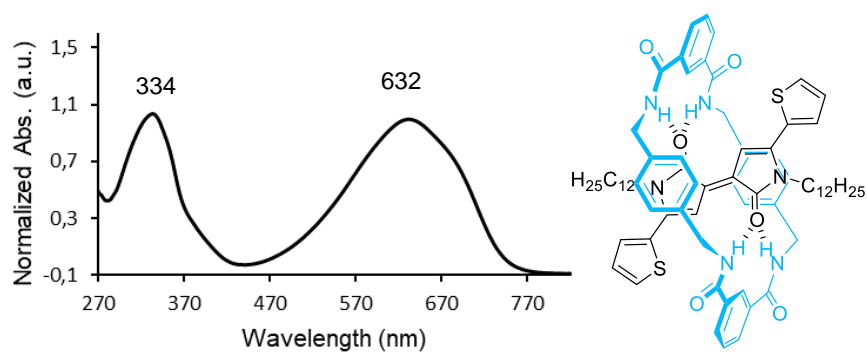

**Figure S55.** Absorption spectra of rotaxane **3b** in ethyl acetate ( $c \approx 1 \times 10^{-5}$  M).

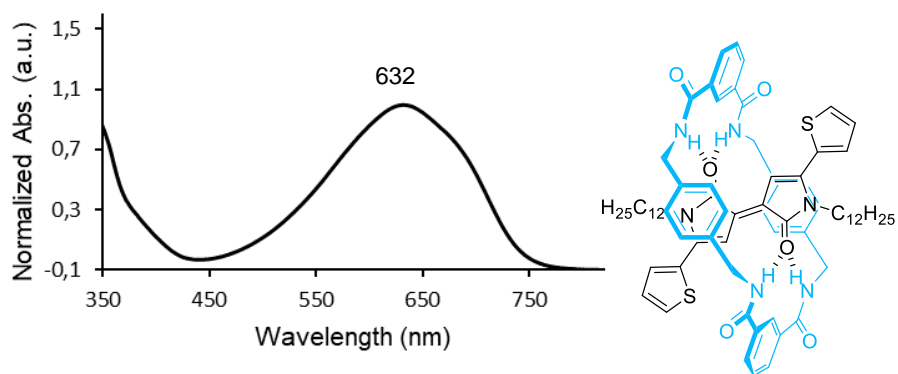

**Figure S56.** Absorption spectra of rotaxane **3b** in acetone ( $c \approx 1 \times 10^{-5}$  M).

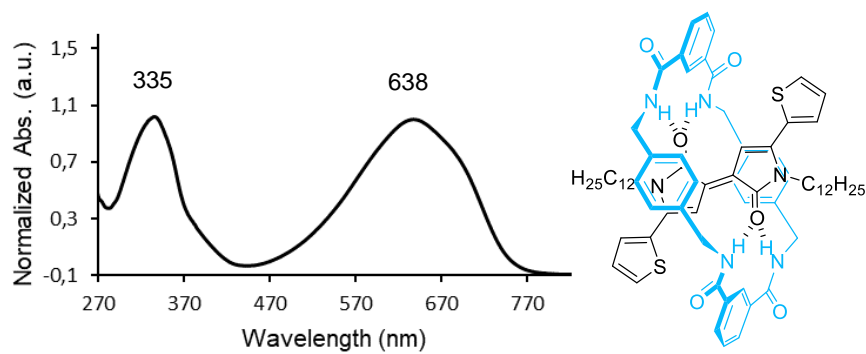

**Figure S57.** Absorption spectra of rotaxane **3b** in tetrahydrofuran ( $c \approx 1 \times 10^{-5}$  M).

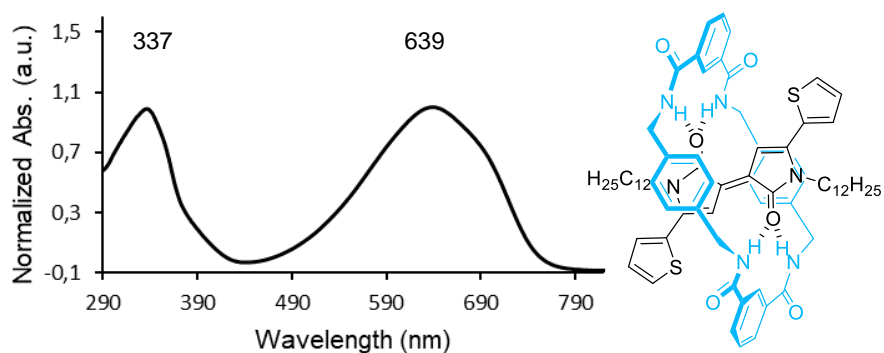

**Figure S58.** Absorption spectra of rotaxane **3b** in toluene ( $c \approx 1 \times 10^{-5}$  M).



**Table S7.** Comparison of the UV-vis spectra of **2b** measured in different solvents.

| Entry | Solvent           | $\lambda_1$ (nm) | $\lambda_2$ (nm) |
|-------|-------------------|------------------|------------------|
| 1     | MeOH              | 331              | 598              |
| 2     | AcCN              | 329              | 598              |
| 3     | DMF               | 332              | 607              |
| 4     | AcOEt             | 328              | 593              |
| 5     | Acetone           | -                | 597              |
| 6     | THF               | 329              | 597              |
| 7     | CHCl <sub>3</sub> | 332              | 607              |
| 8     | Toluene           | 331              | 602              |

**Table S8.** Comparison of the UV-vis spectra of **3b** measured in different solvents.

| Entry | Solvent           | $\lambda_1$ (nm) | $\lambda_2$ (nm) |
|-------|-------------------|------------------|------------------|
| 1     | MeOH              | 330              | 630              |
| 2     | AcCN              | 334              | 629              |
| 3     | DMF               | 336              | 638              |
| 4     | AcOEt             | 334              | 632              |
| 5     | Acetone           | -                | 632              |
| 6     | THF               | 335              | 638              |
| 7     | CHCl <sub>3</sub> | 337              | 638              |
| 8     | Toluene           | 337              | 639              |

## 10. Computational study

### Computational methods

The geometries of the molecules were optimized by using the M06<sup>15</sup> hybrid-functional with the DGDZVP basis sets.<sup>16</sup> This theoretical method has been used in related studies of thiophene-containing Pechmann dyes.<sup>5</sup> The nature of minimum nature of all compounds was confirmed by frequency analysis at the same level of theory. The stability of the resulting wave functions was checked for all the optimized structures.<sup>17</sup> Solvent effects were calculated with the SMD solvation model with chloroform parameters.<sup>18</sup> Frontier Molecular Orbitals of all compounds were simulated at the same level of theory. Time-dependent DFT calculations (SMD(CHCl<sub>3</sub>)/M062-2x/DGDZVP) were carried out to compute the UV-vis absorption maxima on all the optimized structures. The pondered average of  $I_{\max}$  of all the compounds was computed based on the Boltzmann distribution of all the computed conformers and their corresponding  $I_{\max}$ . The ultrafine grid implemented in Gaussian 16 C. 01 was used.<sup>19</sup>

### Frontier Molecular Orbitals

The frontier molecular orbitals of the optimized thread **2j** and [2]rotaxanes **3j-n** were computed. Figure S60 shows the electron density distribution of FMOs of compounds **3k-n** and Table S9 listed the HOMO and LUMO energies of **2j** and **3j-n**.

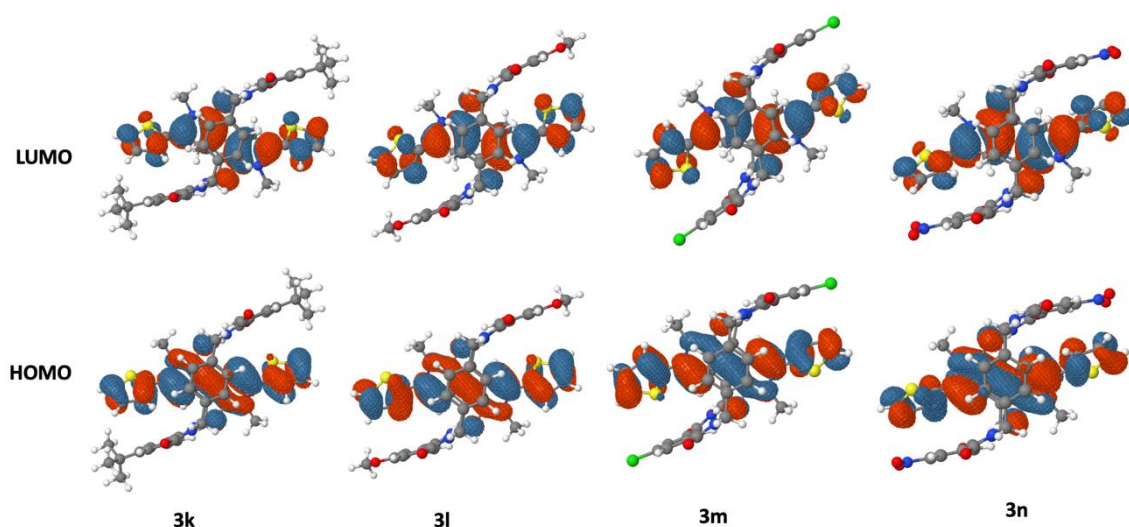

**Figure S59.** Frontier Molecular Orbital, HOMO and LUMO, of interlocked dyes **3k-n**.

**Table S9.** HOMO and LUMO energies (eV).

| Entry | Compound  | HOMO  | LUMO  | HOMO-LUMO<br>Gap |
|-------|-----------|-------|-------|------------------|
| 1     | <b>2j</b> | -5.33 | -2.91 | 2.42             |
| 2     | <b>3j</b> | -5.71 | -3.32 | 2.39             |
| 3     | <b>3k</b> | -5.66 | -3.29 | 2.37             |
| 4     | <b>3l</b> | -5.69 | -3.29 | 2.39             |
| 5     | <b>3m</b> | -5.82 | -3.37 | 2.45             |
| 6     | <b>3n</b> | -5.90 | -3.43 | 2.48             |

### UV-vis absorption analysis

Several theoretical methods were tested to calculate the pondered-average absorption maxima ( $I_{\max}$ ) of the optimized structures of the thread **2j** and the rotaxanes **3j-n**. Taking into account the results obtained for thread **2j**, the M062-2x functional provides the more confident results (Table S10). The functionals B3LYP and PBE0 predict  $I_{\max}$  much higher than that experimentally observed.

**Table S10.** Pondered-average of  $I_{\max}$  (nm) at SMD(CHCl<sub>3</sub>)/TD-DFT “Functional”/DGDZVP//SMD(CHCl<sub>3</sub>)/M06/DGDZVP computational level.

| Entry |                     | <b>2j</b> | <b>3j</b> | <b>3k</b> | <b>3l</b> | <b>3m</b> | <b>3n</b> |
|-------|---------------------|-----------|-----------|-----------|-----------|-----------|-----------|
| 1     | <b>Experimental</b> | 607       | 638       | 638       | 638       | 638       | 638       |
| 2     | <b>M06-2x</b>       | 610.8     | 630.8     | 636.9     | 624.8     | 615.5     | 614.2     |
| 3     | <b>CAM-B3LYP</b>    | 605.2     | 623.8     | 628.1     | 617.7     | 608.0     | 604.3     |
| 4     | <b>B3LYP</b>        | 661.8     | 786.1     | 692.5     | 682.0     | 674.1     | 673.0     |
| 5     | <b>PBE0</b>         | 643.1     | 666.9     | 671.9     | 661.9     | 654.5     | 653.8     |

## Computational Data

**Table S11.** Electronic ( $E_{\text{SCF},298,\text{sol}}$ ), Gibbs free ( $G_{298,\text{sol}}$ ), and enthalpy ( $H_{298,\text{sol}}$ ) energies for conformers of the systems **2j** and **3j-n** (in Hartree) computed at SMD(CHCl<sub>3</sub>)/M06/DGDZVP level. UV-vis absorption maxima  $\lambda_{\text{max}}$  (nm) was calculated at the SMD(CHCl<sub>3</sub>)/TD-DFT M06-2x/DGDZVP//SMD(CHCl<sub>3</sub>)/M06/DGDZVP computational level. Pondered-average of  $\lambda_{\text{max}}$  (nm) is shown in red.

| Compound            | $E_{\text{SCF},298,\text{sol}}$ | $G_{298,\text{sol}}$ | $H_{298,\text{sol}}$ | $\lambda_{\text{max}}$ (nm) |
|---------------------|---------------------------------|----------------------|----------------------|-----------------------------|
| <b>2j</b>           |                                 |                      |                      |                             |
| eje_tph_a_TD        | -1750.0033417                   | -1749.7745080        | -1749.6998730        | 615.2                       |
| eje_tph_b_TD        | -1750.0033333                   | -1749.7747660        | -1749.6999000        | 615.9                       |
| eje_tph_c_TD        | -1750.0041923                   | -1749.7747640        | -1749.7003590        | 610.9                       |
| eje_tph_d_TD        | -1750.0042189                   | -1749.7742640        | -1749.7002570        | 611.01                      |
| eje_tph_e_TD        | -1750.0050544                   | -1749.7749010        | -1749.7009460        | 606.0                       |
| eje_tph_f_TD        | -1750.0050878                   | -1749.7748360        | -1749.7009700        | 608.0                       |
|                     |                                 |                      |                      | <b>610.8</b>                |
| <b>3j</b>           |                                 |                      |                      |                             |
| rtx_tph_01_TD       | -3505.3414044                   | -3504.6055480        | -3504.4548390        | 628.0                       |
| rtx_tph_03_TD       | -3505.3417006                   | -3504.6078900        | -3504.4553820        | 631.5                       |
| rtx_tph_04_TD       | -3505.3418461                   | -3504.6055950        | -3504.4549310        | 628.4                       |
| rtx_tph_05_TD       | -3505.3416508                   | -3504.6067090        | -3504.4553290        | 629.0                       |
| rtx_tph_06_TD       | -3505.3418311                   | -3504.6086480        | -3504.4552030        | 630.9                       |
|                     |                                 |                      |                      | <b>630.8</b>                |
| <b>3k</b>           |                                 |                      |                      |                             |
| rtx_tph_tBu_01_TD   | -3819.6383486                   | -3818.6923950        | -3818.5166850        | 639.6                       |
| rtx_tph_tBu_03_TD   | -3819.6400126                   | -3818.6888140        | -3818.5177140        | 661.3                       |
| rtx_tph_tBu_06_TD   | -3819.6405893                   | -3818.6927650        | -3818.5191200        | 634.3                       |
|                     |                                 |                      |                      | <b>636.9</b>                |
| <b>3l</b>           |                                 |                      |                      |                             |
| rtx_tph_OMe_a_01_TD | -3734.3048643                   | -3733.5077950        | -3733.3484600        | 598.5                       |
| rtx_tph_OMe_a_03_TD | -3734.3033993                   | -3733.5055540        | -3733.3460480        | 613.6                       |
| rtx_tph_OMe_a_04_TD | -3734.3025954                   | -3733.5051220        | -3733.3451540        | 616.4                       |
| rtx_tph_OMe_a_05_TD | -3734.3033997                   | -3733.5055290        | -3733.3460490        | 613.6                       |
| rtx_tph_OMe_a_06_TD | -3734.3026855                   | -3733.5040660        | -3733.3452290        | 609.5                       |
| rtx_tph_OMe_b_01_TD | -3734.3048645                   | -3733.5078170        | -3733.3484640        | 598.6                       |
| rtx_tph_OMe_b_03_TD | -3734.3022900                   | -3733.5094330        | -3733.3458790        | 636.0                       |
| rtx_tph_OMe_b_04_TD | -3734.3034214                   | -3733.5063490        | -3733.3465240        | 608.9                       |
| rtx_tph_OMe_b_05_TD | -3734.3022897                   | -3733.5057340        | -3733.3468300        | 636.0                       |
| rtx_tph_OMe_b_06_TD | -3734.3026098                   | -3733.5060270        | -3733.3453300        | 620.2                       |

|                     |               |               |               |              |
|---------------------|---------------|---------------|---------------|--------------|
| rtx_tph_OMe_c_01_TD | -3734.3023844 | -3733.5042530 | -3733.3449150 | 615.6        |
| rtx_tph_OMe_c_03_TD | -3734.3033975 | -3733.5054540 | -3733.3460360 | 613.6        |
| rtx_tph_OMe_c_04_TD | -3734.3025553 | -3733.5041960 | -3733.3449240 | 625.7        |
| rtx_tph_OMe_c_05_TD | -3734.3033977 | -3733.5055910 | -3733.3460440 | 613.6        |
| rtx_tph_OMe_c_06_TD | -3734.3033862 | -3733.5063290 | -3733.3464450 | 610.2        |
|                     |               |               |               | <b>624.8</b> |
| <b>3m</b>           |               |               |               |              |
| rtx_tph_Cl_01_TD    | -4424.4035423 | -4423.6902600 | -4423.5341790 | 616.9        |
| rtx_tph_Cl_03_TD    | -4424.4030557 | -4423.6919780 | -4423.5334090 | 614.87       |
| rtx_tph_Cl_04_TD    | -4424.4039559 | -4423.6911190 | -4423.5345470 | 617.15       |
| rtx_tph_Cl_05_TD    | -4424.4030565 | -4423.6918790 | -4423.5334040 | 614.92       |
| rtx_tph_Cl_06_TD    | -4424.4039558 | -4423.6909820 | -4423.5345420 | 617.2        |
|                     |               |               |               | <b>615.6</b> |
| <b>3n</b>           |               |               |               |              |
| rtx_tph_NO2_01_TD   | -3914.2308488 | -3913.4948960 | -3913.3346930 | 620.86       |
| rtx_tph_NO2_03_TD   | -3914.2285225 | -3913.4933410 | -3913.3317360 | 600.77       |
| rtx_tph_NO2_04_TD   | -3914.2309817 | -3913.4919470 | -3913.3333120 | 596.67       |
| rtx_tph_NO2_05_TD   | -3914.2285231 | -3913.4933620 | -3913.3317590 | 600.82       |
| rtx_tph_NO2_06_TD   | -3914.2309820 | -3913.4918720 | -3913.3333000 | 596.63       |
|                     |               |               |               | <b>614.2</b> |

## Cartesian Coordinates

Just the conformer of lowest energy is shown.

|           |           |           |           |           |           |           |           |
|-----------|-----------|-----------|-----------|-----------|-----------|-----------|-----------|
| <b>2j</b> |           |           |           | N         | -2.421696 | -1.681079 | 0.069403  |
|           |           |           |           | C         | -1.033546 | -1.651793 | 0.107954  |
| C         | -0.652036 | -0.214271 | 0.016593  | O         | -0.315548 | -2.637327 | 0.215677  |
| C         | 0.652036  | 0.214314  | -0.016594 | C         | -3.165126 | -2.898113 | 0.314709  |
| C         | 1.866092  | -0.524121 | 0.039953  | H         | -3.609933 | -3.298056 | -0.601674 |
| C         | 2.910169  | 0.369398  | 0.009073  | H         | -3.948513 | -2.729672 | 1.057938  |
| N         | 2.421711  | 1.681090  | -0.069506 | H         | -2.464531 | -3.639543 | 0.704502  |
| C         | 1.033562  | 1.651830  | -0.108041 | C         | -4.316905 | -0.059712 | -0.063310 |
| O         | 0.315569  | 2.637375  | -0.215701 | C         | -5.381923 | -0.817965 | -0.503572 |
| C         | 3.165194  | 2.898148  | -0.314488 | C         | -6.616499 | -0.124475 | -0.456720 |
| H         | 3.948531  | 2.729873  | -1.057814 | C         | -6.487209 | 1.150171  | 0.023292  |
| H         | 3.610075  | 3.297794  | 0.601986  | S         | -4.858047 | 1.525847  | 0.425633  |
| H         | 2.464615  | 3.639728  | -0.704022 | H         | -7.263511 | 1.891300  | 0.172621  |
| C         | 4.316901  | 0.059727  | 0.063253  | H         | -7.564088 | -0.550116 | -0.769366 |
| C         | 5.382022  | 0.818116  | 0.503031  | H         | -5.279811 | -1.829048 | -0.883392 |
| C         | 6.616562  | 0.124556  | 0.456285  | H         | -1.953830 | 1.597385  | -0.152765 |
| C         | 6.487149  | -1.150284 | -0.023177 |           |           |           |           |
| S         | 4.857941  | -1.526016 | -0.425263 | <b>3j</b> |           |           |           |
| H         | 7.263396  | -1.891515 | -0.172287 | S         | -4.706415 | -0.323250 | -1.963335 |
| H         | 7.564206  | 0.550288  | 0.768636  | O         | 1.366613  | 0.550966  | -2.342385 |
| H         | 5.280030  | 1.829352  | 0.882468  | N         | -0.886970 | 0.639192  | -2.823525 |
| H         | 1.953780  | -1.597352 | 0.152811  | C         | -0.362346 | 0.173883  | -0.636253 |
| C         | -1.866104 | 0.524155  | -0.039921 | C         | 0.187202  | 0.475883  | -1.983499 |
| C         | -2.910167 | -0.369377 | -0.009094 |           |           |           |           |

|   |           |           |           |           |           |           |           |
|---|-----------|-----------|-----------|-----------|-----------|-----------|-----------|
| C | -2.073923 | 0.437595  | -2.098463 | C         | -4.312283 | 2.268084  | 2.169807  |
| C | -1.777042 | 0.153700  | -0.788287 | C         | -2.061849 | 3.238233  | 2.546306  |
| H | -2.513407 | 0.004600  | -0.009265 | H         | -1.663001 | 3.084449  | 3.558190  |
| C | -3.379217 | 0.537999  | -2.694409 | H         | -2.661414 | 4.154654  | 2.569657  |
| C | -3.816272 | 1.283442  | -3.771075 | O         | 5.155182  | 3.795137  | -0.839316 |
| H | -3.167444 | 1.924265  | -4.359426 | O         | 4.909749  | -3.246836 | -2.321217 |
| C | -5.209807 | 1.169570  | -3.992095 | N         | 3.168277  | 2.825564  | -1.382801 |
| H | -5.744051 | 1.687129  | -4.781692 | H         | 2.661832  | 1.971118  | -1.604048 |
| C | -5.819529 | 0.335377  | -3.093011 | N         | 2.986277  | -2.026932 | -2.315963 |
| H | -6.866724 | 0.060837  | -3.037694 | H         | 2.542488  | -1.130027 | -2.131668 |
| C | -0.731161 | 0.757406  | -4.259566 | C         | 1.455641  | 3.489292  | 1.097883  |
| H | 0.289703  | 0.462598  | -4.510963 | H         | 2.487127  | 3.448336  | 1.450686  |
| H | -0.887560 | 1.784910  | -4.601275 | C         | 0.405465  | 3.296678  | 1.992908  |
| S | 3.841049  | -1.691164 | 3.718008  | H         | 0.619403  | 3.109304  | 3.045424  |
| O | -1.317381 | -0.404327 | 2.161454  | C         | -0.923772 | 3.370796  | 1.565287  |
| N | 0.931801  | -0.559909 | 2.649153  | C         | -1.176127 | 3.600611  | 0.210112  |
| C | 0.426744  | -0.025285 | 0.472927  | H         | -2.207247 | 3.646737  | -0.141430 |
| C | -0.134772 | -0.349322 | 1.810129  | C         | -0.125179 | 3.787513  | -0.685472 |
| C | 2.123957  | -0.354614 | 1.934859  | H         | -0.338000 | 3.985445  | -1.736151 |
| C | 1.841740  | -0.028594 | 0.633197  | C         | 1.203092  | 3.754284  | -0.250483 |
| H | 2.597601  | 0.113138  | -0.127437 | C         | 2.343282  | 4.008250  | -1.205401 |
| C | 3.436438  | -0.495772 | 2.511733  | H         | 2.997089  | 4.801822  | -0.829541 |
| C | 4.560977  | 0.203305  | 2.127829  | H         | 1.950814  | 4.336520  | -2.176412 |
| H | 4.526988  | 1.006830  | 1.393887  | C         | 4.510155  | 2.798795  | -1.171082 |
| C | 5.733297  | -0.211246 | 2.803795  | C         | 5.167637  | 1.453385  | -1.299552 |
| H | 6.712551  | 0.230495  | 2.650691  | C         | 6.456014  | 1.294705  | -0.781982 |
| C | 5.497616  | -1.228429 | 3.688201  | H         | 6.970638  | 2.164411  | -0.380390 |
| H | 6.205684  | -1.732462 | 4.335422  | C         | 7.054276  | 0.037595  | -0.767576 |
| C | 0.771408  | -0.717896 | 4.081173  | H         | 8.057435  | -0.078794 | -0.366072 |
| H | -0.261041 | -0.464856 | 4.330860  | C         | 6.360307  | -1.077388 | -1.229875 |
| H | 0.957815  | -1.747878 | 4.400965  | H         | 6.800836  | -2.070176 | -1.183462 |
| O | -5.128465 | -3.730147 | 1.005622  | C         | 5.074385  | -0.934065 | -1.756158 |
| O | -4.900663 | 3.325174  | 2.401907  | C         | 4.511592  | 0.340694  | -1.826966 |
| N | -3.119799 | -2.693545 | 1.283779  | H         | 3.553314  | 0.470830  | -2.318489 |
| H | -2.617335 | -1.821702 | 1.433806  | C         | 4.329038  | -2.171241 | -2.168501 |
| N | -2.958451 | 2.152842  | 2.194508  | C         | 2.088557  | -3.113463 | -2.659351 |
| H | -2.512521 | 1.263996  | 1.977868  | H         | 1.681546  | -2.957129 | -3.667304 |
| C | -1.416625 | -3.376649 | -1.184728 | H         | 2.689956  | -4.028363 | -2.688449 |
| H | -2.450614 | -3.347771 | -1.530162 | H         | 1.439886  | -0.039662 | 4.617668  |
| C | -0.373798 | -3.187019 | -2.088656 | H         | -1.427958 | 0.090114  | -4.772370 |
| H | -0.595938 | -3.011590 | -3.141656 |           |           |           |           |
| C | 0.958424  | -3.248503 | -1.669097 |           |           |           |           |
| C | 1.221976  | -3.465042 | -0.313672 | <b>3k</b> |           |           |           |
| H | 2.256310  | -3.503912 | 0.031100  | S         | 4.566218  | -1.873213 | 1.334676  |
| C | 0.178104  | -3.647686 | 0.591234  | O         | -1.358140 | -0.710186 | 2.342967  |
| H | 0.399607  | -3.836622 | 1.642143  | N         | 0.888561  | -1.056592 | 2.731109  |
| C | -1.153501 | -3.625066 | 0.164660  | C         | 0.364009  | -0.221939 | 0.656741  |
| C | -2.287253 | -3.873699 | 1.127986  | C         | -0.182226 | -0.660477 | 1.968039  |
| H | -2.935061 | -4.679875 | 0.768053  | C         | 2.066722  | -0.929815 | 1.973233  |
| H | -1.888089 | -4.183628 | 2.102902  | C         | 1.770696  | -0.425123 | 0.732015  |
| C | -4.476936 | -2.705934 | 1.217202  | H         | 2.505864  | -0.192555 | -0.027334 |
| C | -5.145665 | -1.368186 | 1.356269  | C         | 3.355128  | -1.335419 | 2.469255  |
| C | -6.465050 | -1.233918 | 0.917742  | C         | 3.847687  | -1.366634 | 3.757863  |
| H | -6.991112 | -2.115211 | 0.558271  | H         | 3.276701  | -1.047617 | 4.623830  |
| C | -7.080508 | 0.015114  | 0.925976  | C         | 5.189090  | -1.812196 | 3.826673  |
| H | -8.107520 | 0.113528  | 0.584286  | H         | 5.754474  | -1.899446 | 4.748330  |
| C | -6.379024 | 1.143793  | 1.343251  | C         | 5.703868  | -2.125421 | 2.596674  |
| H | -6.839524 | 2.128413  | 1.322196  | H         | 6.690069  | -2.510131 | 2.364245  |
| C | -5.061407 | 1.023190  | 1.790872  | C         | 0.721952  | -1.716463 | 4.010458  |
| C | -4.474052 | -0.241728 | 1.830010  | H         | -0.331460 | -1.983998 | 4.112905  |
| H | -3.486785 | -0.354960 | 2.265093  |           |           |           |           |

|   |           |           |           |           |            |           |           |
|---|-----------|-----------|-----------|-----------|------------|-----------|-----------|
| H | 0.994057  | -1.060984 | 4.842998  | H         | -0.702007  | 4.395533  | -0.736200 |
| S | -3.994438 | 1.034465  | -3.795800 | C         | 0.805200   | 3.673268  | 0.623228  |
| O | 1.296725  | 0.790981  | -2.027935 | C         | 1.025412   | 3.076035  | 1.867951  |
| N | -0.956378 | 1.072927  | -2.441683 | H         | 2.045822   | 2.860985  | 2.184699  |
| C | -0.424830 | 0.272252  | -0.354961 | C         | -0.043831  | 2.767280  | 2.706317  |
| C | 0.119197  | 0.710773  | -1.666925 | H         | 0.144917   | 2.311998  | 3.678943  |
| C | -2.131993 | 0.941909  | -1.682050 | C         | -1.359039  | 3.054980  | 2.328473  |
| C | -1.833840 | 0.458181  | -0.435205 | C         | -2.523934  | 2.730572  | 3.231611  |
| H | -2.576126 | 0.213293  | 0.311374  | H         | -3.212959  | 3.577765  | 3.301683  |
| C | -3.440788 | 1.306478  | -2.162986 | H         | -2.164254  | 2.509593  | 4.244316  |
| C | -4.450951 | 1.843774  | -1.393598 | C         | -4.607768  | 1.659901  | 2.406847  |
| H | -4.311110 | 2.109518  | -0.348196 | C         | -5.189689  | 0.430647  | 1.765146  |
| C | -5.651679 | 2.049366  | -2.113581 | C         | -6.468119  | 0.522800  | 1.203937  |
| H | -6.549229 | 2.485360  | -1.685842 | H         | -7.004506  | 1.458681  | 1.341805  |
| C | -5.555325 | 1.652550  | -3.419809 | C         | -7.031322  | -0.536019 | 0.488452  |
| H | -6.314473 | 1.693975  | -4.192343 | C         | -6.246275  | -1.680648 | 0.294916  |
| C | -0.802687 | 1.744259  | -3.716965 | H         | -6.617179  | -2.519163 | -0.292196 |
| H | 0.258388  | 1.963982  | -3.850599 | C         | -4.972078  | -1.795784 | 0.845455  |
| H | -1.129787 | 1.114512  | -4.549788 | C         | -4.472210  | -0.752873 | 1.625231  |
| O | 5.203264  | -2.546995 | -2.717990 | H         | -3.524802  | -0.877841 | 2.137475  |
| O | 4.794470  | 4.132704  | -0.105899 | C         | -4.168579  | -3.026349 | 0.537236  |
| N | 3.187113  | -1.493072 | -2.651536 | C         | -1.896943  | -4.017465 | 0.554951  |
| H | 2.656084  | -0.672600 | -2.366953 | H         | -1.466819  | -4.364821 | 1.504062  |
| N | 2.874497  | 2.975867  | -0.509656 | H         | -2.470913  | -4.850521 | 0.134915  |
| H | 2.451697  | 2.098034  | -0.802539 | H         | -1.361480  | 2.684160  | -3.726288 |
| C | 1.568709  | -3.531136 | -0.952522 | H         | 1.324719   | -2.627175 | 4.050081  |
| H | 2.607650  | -3.737692 | -0.691966 | C         | -8.448908  | -0.494533 | -0.076758 |
| C | 0.548472  | -3.849579 | -0.059505 | C         | -9.141298  | 0.840015  | 0.186743  |
| H | 0.793422  | -4.305356 | 0.900531  | C         | -8.421049  | -0.731639 | -1.590299 |
| C | -0.789580 | -3.609875 | -0.385919 | C         | -9.277023  | -1.599558 | 0.590287  |
| C | -1.080385 | -3.017588 | -1.618012 | H         | -9.231525  | 1.053063  | 1.258606  |
| H | -2.119060 | -2.819555 | -1.885210 | H         | -8.616528  | 1.679535  | -0.286167 |
| C | -0.057785 | -2.688980 | -2.505786 | H         | -10.155804 | 0.812485  | -0.228303 |
| H | -0.300894 | -2.236116 | -3.467439 | H         | -8.003496  | -1.710450 | -1.850467 |
| C | 1.278588  | -2.953401 | -2.190447 | H         | -9.440639  | -0.690931 | -1.993938 |
| C | 2.394023  | -2.607266 | -3.145336 | H         | -7.822813  | 0.034585  | -2.100935 |
| H | 3.075737  | -3.453532 | -3.275541 | H         | -10.304292 | -1.585321 | 0.204707  |
| H | 1.980838  | -2.358693 | -4.131185 | H         | -8.862838  | -2.595567 | 0.397971  |
| C | 4.529981  | -1.549553 | -2.450241 | H         | -9.320724  | -1.456500 | 1.676955  |
| C | 5.152833  | -0.334648 | -1.820882 | C         | 8.540296   | 0.470176  | -0.229275 |
| C | 6.470005  | -0.425992 | -1.376572 | C         | 9.070491   | 1.729441  | 0.451335  |
| H | 7.003406  | -1.353682 | -1.578963 | C         | 8.641554   | -0.689743 | 0.766811  |
| C | 7.089627  | 0.620302  | -0.679261 | C         | 9.426588   | 0.176059  | -1.444413 |
| C | 6.326448  | 1.755075  | -0.398602 | H         | 9.032598   | 2.601652  | -0.212417 |
| H | 6.738894  | 2.587258  | 0.166420  | H         | 8.516416   | 1.969170  | 1.366761  |
| C | 5.002991  | 1.868320  | -0.834986 | H         | 10.118567  | 1.575971  | 0.734766  |
| C | 4.438973  | 0.840311  | -1.582761 | H         | 8.313921   | -1.638999 | 0.325371  |
| H | 3.447771  | 0.971624  | -2.001840 | H         | 9.680654   | -0.817122 | 1.096413  |
| C | 4.228366  | 3.097964  | -0.461592 | H         | 8.025438   | -0.493401 | 1.654734  |
| C | 1.960815  | 4.074523  | -0.258966 | H         | 10.473758  | 0.082391  | -1.130602 |
| H | 1.577611  | 4.471412  | -1.209367 | H         | 9.148234   | -0.757204 | -1.946001 |
| H | 2.544294  | 4.873739  | 0.211306  | H         | 9.365366   | 0.986300  | -2.181121 |
| O | -5.286558 | 2.676870  | 2.567993  |           |            |           |           |
| O | -4.689552 | -4.026948 | 0.042236  | <b>3I</b> |            |           |           |
| N | -3.288563 | 1.599165  | 2.729721  | S         | 4.726871   | -1.199249 | 1.459446  |
| H | -2.745346 | 0.760616  | 2.534423  | O         | -1.380378  | -1.106793 | 2.142582  |
| N | -2.838700 | -2.944620 | 0.809082  | N         | 0.871058   | -1.203962 | 2.632216  |
| H | -2.442816 | -2.075286 | 1.159447  | C         | 0.347305   | -0.332499 | 0.573537  |
| C | -1.578994 | 3.635276  | 1.077311  | C         | -0.202463  | -0.906592 | 1.828994  |
| H | -2.599841 | 3.861447  | 0.766596  | C         | 2.057026   | -0.868274 | 1.959527  |
| C | -0.511843 | 3.934704  | 0.233491  |           |            |           |           |

|   |           |           |           |           |           |           |           |
|---|-----------|-----------|-----------|-----------|-----------|-----------|-----------|
| C | 1.761048  | -0.351272 | 0.722576  | H         | 1.659765  | 4.550118  | -1.070187 |
| H | 2.494997  | 0.029492  | 0.024637  | H         | 2.669451  | 4.821706  | 0.354926  |
| C | 3.364018  | -1.040832 | 2.533436  | O         | -5.101771 | 2.475979  | 2.838359  |
| C | 3.777405  | -1.034830 | 3.850435  | O         | -4.970523 | -4.136373 | 0.006419  |
| H | 3.101395  | -0.915869 | 4.691081  | N         | -3.136700 | 1.327955  | 2.722912  |
| C | 5.182505  | -1.142739 | 3.987159  | H         | -2.649158 | 0.506473  | 2.371125  |
| H | 5.702475  | -1.142862 | 4.939165  | N         | -3.027575 | -3.126839 | 0.640723  |
| C | 5.823889  | -1.239127 | 2.780710  | H         | -2.580256 | -2.284729 | 0.996684  |
| H | 6.887448  | -1.341440 | 2.596164  | C         | -1.433053 | 3.323225  | 1.143184  |
| C | 0.727324  | -1.918504 | 3.884031  | H         | -2.469199 | 3.458134  | 0.828344  |
| H | -0.268413 | -2.366160 | 3.901864  | C         | -0.392283 | 3.728627  | 0.310129  |
| H | 0.820771  | -1.249384 | 4.745080  | H         | -0.618709 | 4.189998  | -0.652034 |
| S | -3.806503 | 2.816442  | -2.996035 | C         | 0.941636  | 3.579708  | 0.703169  |
| O | 1.303156  | 0.930777  | -1.990042 | C         | 1.210148  | 2.977646  | 1.934967  |
| N | -0.941953 | 1.313013  | -2.361349 | H         | 2.245948  | 2.837989  | 2.247538  |
| C | -0.441118 | 0.153380  | -0.443831 | C         | 0.169394  | 2.568321  | 2.766136  |
| C | 0.122398  | 0.822832  | -1.644504 | H         | 0.395180  | 2.114713  | 3.731741  |
| C | -2.135463 | 0.945170  | -1.718873 | C         | -1.164615 | 2.752169  | 2.389920  |
| C | -1.854785 | 0.239585  | -0.576287 | C         | -2.294914 | 2.356155  | 3.308264  |
| H | -2.608658 | -0.105159 | 0.118175  | H         | -2.940652 | 3.214159  | 3.522164  |
| C | -3.447913 | 1.313729  | -2.182570 | H         | -1.890399 | 2.001568  | 4.265067  |
| C | -4.607172 | 0.608580  | -1.937502 | C         | -4.471678 | 1.469528  | 2.512797  |
| H | -4.603707 | -0.366106 | -1.451281 | C         | -5.137572 | 0.322049  | 1.804542  |
| C | -5.769862 | 1.266506  | -2.404168 | C         | -6.378601 | 0.546114  | 1.222405  |
| H | -6.776512 | 0.869058  | -2.312519 | H         | -6.867437 | 1.511668  | 1.331796  |
| C | -5.491403 | 2.469623  | -2.994119 | C         | -6.999889 | -0.461422 | 0.474418  |
| H | -6.183379 | 3.177174  | -3.435642 | C         | -6.352598 | -1.680179 | 0.267828  |
| C | -0.783844 | 1.923072  | -3.666205 | H         | -6.780789 | -2.467661 | -0.346304 |
| H | 0.240081  | 1.740153  | -3.997746 | C         | -5.097259 | -1.899618 | 0.843819  |
| H | -1.472424 | 1.474958  | -4.386970 | C         | -4.519122 | -0.922537 | 1.647649  |
| O | 5.092646  | -2.453069 | -3.056127 | H         | -3.593824 | -1.137984 | 2.170539  |
| O | 4.904419  | 3.996389  | 0.121763  | C         | -4.374851 | -3.165943 | 0.476816  |
| N | 3.089977  | -1.468011 | -2.597051 | C         | -2.128439 | -4.206451 | 0.276810  |
| H | 2.597357  | -0.677347 | -2.186041 | H         | -1.724865 | -4.680424 | 1.181627  |
| N | 2.969790  | 2.997960  | -0.551097 | H         | -2.725226 | -4.960033 | -0.248326 |
| H | 2.527049  | 2.169351  | -0.942176 | H         | -0.942231 | 3.005845  | -3.629113 |
| C | 1.379852  | -3.455340 | -1.019955 | H         | 1.473322  | -2.713502 | 3.954608  |
| H | 2.413686  | -3.586421 | -0.697955 | O         | 8.320182  | 0.368759  | -0.219321 |
| C | 0.335583  | -3.861976 | -0.191773 | O         | -8.210430 | -0.142203 | -0.046195 |
| H | 0.556977  | -4.317562 | 0.773687  | C         | 9.073829  | -0.786795 | -0.545351 |
| C | -0.996123 | -3.716002 | -0.591965 | H         | 10.056476 | -0.647448 | -0.094117 |
| C | -1.258409 | -3.114595 | -1.825607 | H         | 8.616083  | -1.695173 | -0.133310 |
| H | -2.292551 | -2.976102 | -2.144207 | H         | 9.188746  | -0.897725 | -1.630044 |
| C | -0.214366 | -2.703882 | -2.651764 | C         | -8.881227 | -1.132808 | -0.807185 |
| H | -0.435645 | -2.249461 | -3.617606 | H         | -9.828621 | -0.690279 | -1.115855 |
| C | 1.118013  | -2.886494 | -2.269113 | H         | -8.307949 | -1.412151 | -1.700349 |
| C | 2.250667  | -2.496286 | -3.186237 | H         | -9.081332 | -2.029605 | -0.208966 |
| H | 2.895520  | -3.356585 | -3.395080 |           |           |           |           |
| H | 1.848454  | -2.149142 | -4.147343 | <b>3m</b> |           |           |           |
| C | 4.447953  | -1.513578 | -2.587127 | S         | -4.761347 | 1.240461  | 1.527663  |
| C | 5.124627  | -0.361704 | -1.899486 | O         | 1.348333  | 1.204909  | 2.128575  |
| C | 6.436760  | -0.547505 | -1.454902 | N         | -0.899073 | 1.239291  | 2.636337  |
| H | 6.931459  | -1.485422 | -1.691599 | C         | -0.370897 | 0.373963  | 0.576209  |
| C | 7.056890  | 0.452582  | -0.704838 | C         | 0.173841  | 0.970226  | 1.825493  |
| C | 6.356815  | 1.620003  | -0.374123 | C         | -2.081945 | 0.863649  | 1.977111  |
| H | 6.834458  | 2.373644  | 0.247919  | C         | -1.784975 | 0.345552  | 0.741369  |
| C | 5.057790  | 1.808001  | -0.827490 | H         | -2.515230 | -0.077297 | 0.062315  |
| C | 4.459599  | 0.827422  | -1.624613 | C         | -3.383863 | 1.015931  | 2.570427  |
| H | 3.484574  | 1.007497  | -2.062534 | C         | -3.775400 | 0.966432  | 3.892747  |
| C | 4.317670  | 3.040062  | -0.385573 | H         | -3.086721 | 0.807392  | 4.716546  |
| C | 2.069507  | 4.071091  | -0.170626 |           |           |           |           |



|   |           |           |           |           |           |           |           |
|---|-----------|-----------|-----------|-----------|-----------|-----------|-----------|
| C | -5.175869 | 1.092023  | 4.058206  | H         | 2.511980  | -0.509200 | 2.378235  |
| H | -5.679570 | 1.065309  | 5.018487  | N         | 3.145859  | 3.136840  | 0.745963  |
| C | -5.835691 | 1.248196  | 2.868427  | H         | 2.647850  | 2.367742  | 1.190898  |
| H | -6.899047 | 1.381956  | 2.706093  | C         | 1.355203  | -3.239482 | 1.076190  |
| C | -0.763216 | 1.967847  | 3.881557  | H         | 2.413579  | -3.306652 | 0.819932  |
| H | 0.209490  | 2.463955  | 3.875535  | C         | 0.390992  | -3.660812 | 0.163296  |
| H | -0.804955 | 1.300390  | 4.747782  | H         | 0.700544  | -4.065700 | -0.801156 |
| S | 3.986741  | -2.540525 | -2.879557 | C         | -0.969861 | -3.596228 | 0.477378  |
| O | -1.277552 | -0.826008 | -2.043339 | C         | -1.345378 | -3.067537 | 1.714806  |
| N | 0.981747  | -1.139172 | -2.401152 | H         | -2.404430 | -2.993601 | 1.966207  |
| C | 0.429840  | -0.062682 | -0.450828 | C         | -0.381745 | -2.641410 | 2.625721  |
| C | -0.102798 | -0.707724 | -1.679428 | H         | -0.690389 | -2.240591 | 3.591596  |
| C | 2.157332  | -0.735943 | -1.745642 | C         | 0.979982  | -2.736416 | 2.324886  |
| C | 1.849270  | -0.088887 | -0.580767 | C         | 2.026898  | -2.319220 | 3.328316  |
| H | 2.589328  | 0.256308  | 0.127060  | H         | 2.627452  | -3.178547 | 3.644392  |
| C | 3.483493  | -0.992119 | -2.253663 | H         | 1.542576  | -1.908401 | 4.223239  |
| C | 4.542485  | -0.113345 | -2.217244 | C         | 4.270170  | -1.568727 | 2.591922  |
| H | 4.437094  | 0.914633  | -1.875459 | C         | 5.015390  | -0.479594 | 1.872304  |
| C | 5.748979  | -0.676343 | -2.702998 | C         | 6.252730  | -0.794687 | 1.310398  |
| H | 6.688145  | -0.136639 | -2.775464 | H         | 6.676415  | -1.785044 | 1.458053  |
| C | 5.602195  | -1.980537 | -3.088123 | C         | 6.913958  | 0.170089  | 0.560682  |
| H | 6.352554  | -2.649733 | -3.492564 | C         | 6.355706  | 1.416766  | 0.308295  |
| C | 0.870334  | -1.713066 | -3.726991 | H         | 6.858322  | 2.142298  | -0.327482 |
| H | -0.154216 | -1.564153 | -4.072971 | C         | 5.113644  | 1.728255  | 0.863764  |
| H | 1.554583  | -1.213904 | -4.417851 | C         | 4.483479  | 0.795766  | 1.686245  |
| O | -5.072590 | 2.617490  | -2.934384 | H         | 3.567103  | 1.066691  | 2.199211  |
| O | -4.858490 | -4.036507 | -0.212528 | C         | 4.464860  | 3.021964  | 0.449279  |
| N | -3.060046 | 1.666894  | -2.442069 | C         | 2.314057  | 4.256262  | 0.334957  |
| H | -2.559566 | 0.852670  | -2.089819 | H         | 1.961070  | 4.795510  | 1.223246  |
| N | -2.929221 | -3.016828 | -0.870114 | H         | 2.952175  | 4.939826  | -0.233969 |
| H | -2.485472 | -2.166396 | -1.210825 | H         | 1.080110  | -2.787639 | -3.719545 |
| C | -1.259806 | 3.555457  | -0.808810 | H         | -1.545317 | 2.725739  | 3.964400  |
| H | -2.275649 | 3.672851  | -0.429874 | Cl        | 8.480311  | -0.213248 | -0.121951 |
| C | -0.173463 | 3.921964  | -0.016137 | Cl        | -8.656821 | -0.318016 | -0.261322 |
| H | -0.344236 | 4.330026  | 0.980601  |           |           |           |           |
| C | 1.135558  | 3.806720  | -0.494736 |           |           |           |           |
| C | 1.332547  | 3.272881  | -1.770367 | <b>3n</b> |           |           |           |
| H | 2.347690  | 3.170220  | -2.155608 | S         | -4.571835 | -1.518944 | 2.932616  |
| C | 0.247340  | 2.898217  | -2.560019 | O         | 0.980446  | -0.904304 | 2.319266  |
| H | 0.417568  | 2.502340  | -3.561105 | N         | -1.320505 | -0.807783 | 2.508264  |
| C | -1.063220 | 3.055846  | -2.099353 | C         | -0.461763 | -0.075707 | 0.508856  |
| C | -2.237705 | 2.733545  | -2.988496 | C         | -0.129586 | -0.652507 | 1.841320  |
| H | -2.885000 | 3.609195  | -3.105194 | C         | -2.357877 | -0.269834 | 1.725299  |
| H | -1.880854 | 2.458416  | -3.989918 | C         | -1.861816 | 0.180601  | 0.532482  |
| C | -4.417448 | 1.672711  | -2.495143 | H         | -2.464442 | 0.602161  | -0.258468 |
| C | -5.090025 | 0.462095  | -1.912103 | C         | -3.732614 | -0.199596 | 2.157475  |
| C | -6.407374 | 0.591969  | -1.471678 | C         | -4.589177 | 0.854928  | 1.929285  |
| H | -6.936191 | 1.530853  | -1.618566 | H         | -4.260247 | 1.783154  | 1.466709  |
| C | -7.007292 | -0.482710 | -0.827975 | C         | -5.906887 | 0.612165  | 2.391015  |
| C | -6.329024 | -1.671733 | -0.587653 | H         | -6.719870 | 1.328267  | 2.322271  |
| H | -6.796859 | -2.490545 | -0.046413 | C         | -6.047718 | -0.631785 | 2.943195  |
| C | -5.016097 | -1.803773 | -1.040144 | H         | -6.938842 | -1.080429 | 3.367132  |
| C | -4.424041 | -0.747934 | -1.734000 | C         | -1.397022 | -1.206650 | 3.900101  |
| H | -3.436906 | -0.871836 | -2.164992 | H         | -0.381285 | -1.224603 | 4.299506  |
| C | -4.271730 | -3.061622 | -0.682027 | H         | -1.829936 | -2.205656 | 4.008904  |
| C | -2.018955 | -4.082751 | -0.491597 | S         | 4.587905  | 1.452865  | -2.957043 |
| H | -1.537482 | -4.493686 | -1.388552 | O         | -0.978506 | 0.924598  | -2.301836 |
| H | -2.623066 | -4.880260 | -0.046711 | N         | 1.320999  | 0.808391  | -2.496918 |
| O | 4.834315  | -2.604253 | 2.943045  | C         | 0.462147  | 0.092757  | -0.491636 |
| O | 5.097994  | 3.879578  | -0.167532 | C         | 0.130806  | 0.665869  | -1.825855 |
| N | 2.944878  | -1.338155 | 2.779756  |           |           |           |           |

|   |           |           |           |   |           |           |           |
|---|-----------|-----------|-----------|---|-----------|-----------|-----------|
| C | 2.356393  | 0.264966  | -1.714889 | H | -0.798807 | -2.662290 | -3.703960 |
| C | 1.860653  | -0.171056 | -0.516715 | H | -1.929096 | -3.874597 | -3.097988 |
| H | 2.461277  | -0.596908 | 0.273347  | O | 5.139911  | -3.630238 | 1.115032  |
| C | 3.726619  | 0.164197  | -2.155365 | O | 4.173388  | 3.352496  | 2.524066  |
| C | 4.562132  | -0.905375 | -1.917988 | N | 3.092330  | -2.928177 | 1.827250  |
| H | 4.215165  | -1.819716 | -1.440286 | H | 2.493886  | -2.132682 | 2.043452  |
| C | 5.881259  | -0.697938 | -2.392620 | N | 2.353812  | 1.979660  | 2.490087  |
| H | 6.679052  | -1.430445 | -2.319792 | H | 1.991265  | 1.058129  | 2.252386  |
| C | 6.044540  | 0.534506  | -2.964194 | C | 1.842515  | -3.717349 | -0.909938 |
| H | 6.941864  | 0.958125  | -3.400749 | H | 2.909298  | -3.809464 | -1.117562 |
| C | 1.397531  | 1.211858  | -3.887125 | C | 0.956955  | -3.400381 | -1.936352 |
| H | 0.379485  | 1.256558  | -4.278496 | H | 1.334988  | -3.242733 | -2.946539 |
| H | 1.852964  | 2.201171  | -3.993307 | C | -0.413702 | -3.284321 | -1.688591 |
| O | -5.142119 | 3.637398  | -1.086905 | C | -0.877403 | -3.493857 | -0.386521 |
| O | -4.161666 | -3.332852 | -2.547150 | H | -1.945100 | -3.418955 | -0.175794 |
| N | -3.094633 | 2.945771  | -1.809590 | C | 0.012207  | -3.797419 | 0.642621  |
| H | -2.493695 | 2.153258  | -2.029719 | H | -0.362959 | -3.951697 | 1.654933  |
| N | -2.344539 | -1.957319 | -2.489152 | C | 1.383349  | -3.910824 | 0.394787  |
| H | -1.985687 | -1.037210 | -2.240818 | C | 2.368885  | -4.155341 | 1.511383  |
| C | -1.833843 | 3.764088  | 0.928186  | H | 3.110884  | -4.908577 | 1.231968  |
| H | -2.896597 | 3.877552  | 1.144087  | H | 1.850752  | -4.507446 | 2.410506  |
| C | -0.943634 | 3.447810  | 1.950867  | C | 4.397229  | -2.733381 | 1.513307  |
| H | -1.314714 | 3.308990  | 2.966257  | C | 4.891797  | -1.311958 | 1.596758  |
| C | 0.423200  | 3.310568  | 1.692834  | C | 6.110623  | -1.032338 | 0.983903  |
| C | 0.878429  | 3.500036  | 0.384739  | H | 6.709882  | -1.842606 | 0.577758  |
| H | 1.943409  | 3.410681  | 0.166300  | C | 6.514979  | 0.290817  | 0.867650  |
| C | -0.016061 | 3.802230  | -0.640532 | C | 5.745092  | 1.350701  | 1.326398  |
| H | 0.352411  | 3.939812  | -1.657761 | H | 6.066143  | 2.379756  | 1.191641  |
| C | -1.383665 | 3.934902  | -0.382816 | C | 4.535042  | 1.070330  | 1.955669  |
| C | -2.375398 | 4.175919  | -1.494545 | C | 4.139300  | -0.258045 | 2.119934  |
| H | -3.119680 | 4.925187  | -1.210750 | H | 3.221090  | -0.467597 | 2.662177  |
| H | -1.863134 | 4.531367  | -2.395731 | C | 3.681088  | 2.237559  | 2.362450  |
| C | -4.398097 | 2.745200  | -1.493242 | C | 1.380238  | 3.005222  | 2.819831  |
| C | -4.890800 | 1.323746  | -1.587760 | H | 0.816642  | 2.695979  | 3.708688  |
| C | -6.113639 | 1.038660  | -0.985398 | H | 1.948176  | 3.901289  | 3.091466  |
| H | -6.716063 | 1.845149  | -0.576352 | H | 1.969118  | 0.483059  | -4.467993 |
| C | -6.518751 | -0.285549 | -0.883807 | H | -1.990937 | -0.488755 | 4.471873  |
| C | -5.744962 | -1.341540 | -1.345012 | N | 7.774050  | 0.583992  | 0.172175  |
| H | -6.066822 | -2.371714 | -1.221106 | O | 8.482582  | -0.360245 | -0.156318 |
| C | -4.530355 | -1.055657 | -1.962758 | O | 8.045681  | 1.757524  | -0.051443 |
| C | -4.134543 | 0.274162  | -2.114185 | N | -7.784062 | -0.585291 | -0.202566 |
| H | -3.213248 | 0.488150  | -2.649330 | O | -8.060519 | -1.761084 | 0.002311  |
| C | -3.672178 | -2.218619 | -2.372848 | O | -8.493003 | 0.356079  | 0.133402  |
| C | -1.365751 | -2.977792 | -2.819366 |   |           |           |           |

## 11. Electrochemical analysis of aza-Pechmann dyes **2b-c** and rotaxanes **3b-c,f-i**

The electrochemical properties of free dyes **2b-c** and rotaxanes **3b-c,f-i** (conc. aprox. 0.1 mM) at 25 °C have been studied by cyclic voltammetry (CV) in dichloromethane (DCM)/Bu<sub>4</sub>NPF<sub>6</sub> (TBAPF<sub>6</sub>) (0.1 M). The peak potentials (summarized in Table 1 in the main text) are quoted with respect to the Ag/Ag<sup>+</sup>(sat) reference electrode, when a Pt wire was used as the working and as the auxiliary electrode. The band gaps are determined from the difference between the energy of the LUMO levels (electron affinity) estimated from the first onset reduction potential ( $E^{red1}_{onset}$ ) and the HOMO levels energy (ionization potential) estimated from the onset potential value ( $E^{ox}_{onset}$ ) of the first anodic peak in the cyclic voltammograms (that is not reversible under these experimental conditions), applying the following equations<sup>20</sup>: LUMO =  $-(E_{pc1} + 4.41)$  eV, HOMO =  $-(E^{ox}_{onset} + 4.41)$  eV.

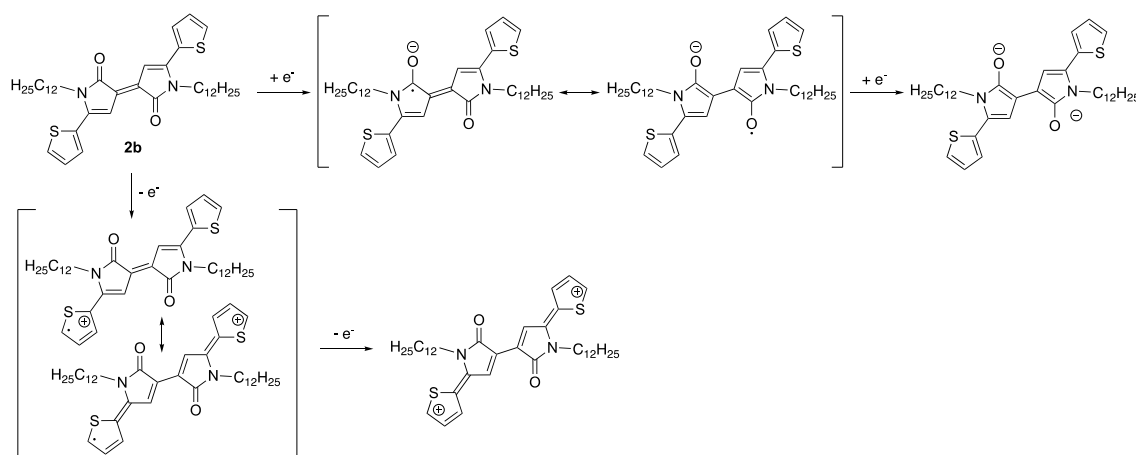

**Scheme S2.** Mechanism of electroreduction and electrooxidation of **2b** to give the corresponding dianions or dications.

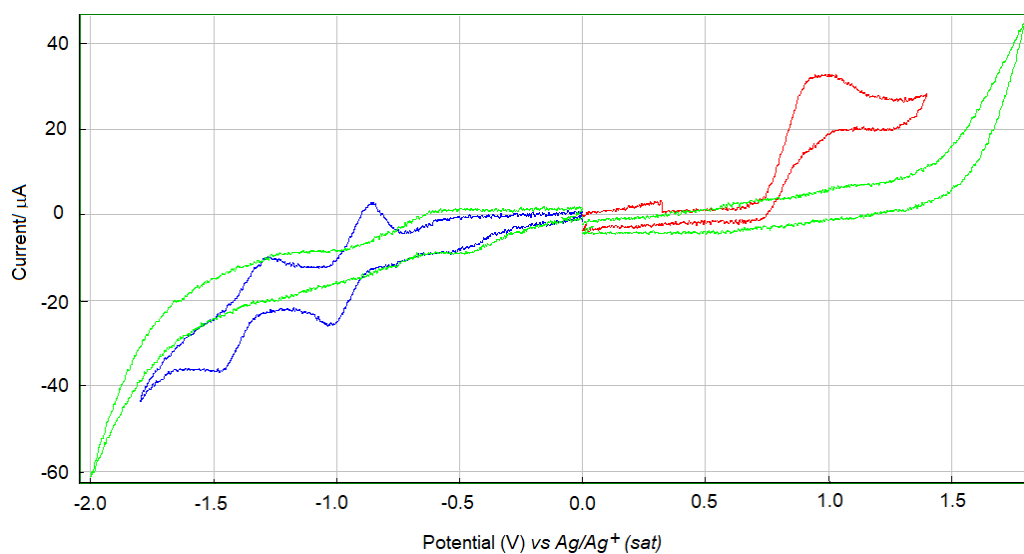

**Figure S60.** Cyclic voltammetry (cathodic-blue and anodic-red scans) of **2b** in DCM-TBAPF<sub>6</sub> as SSE (green curves). Scan rate: 50mV/s.

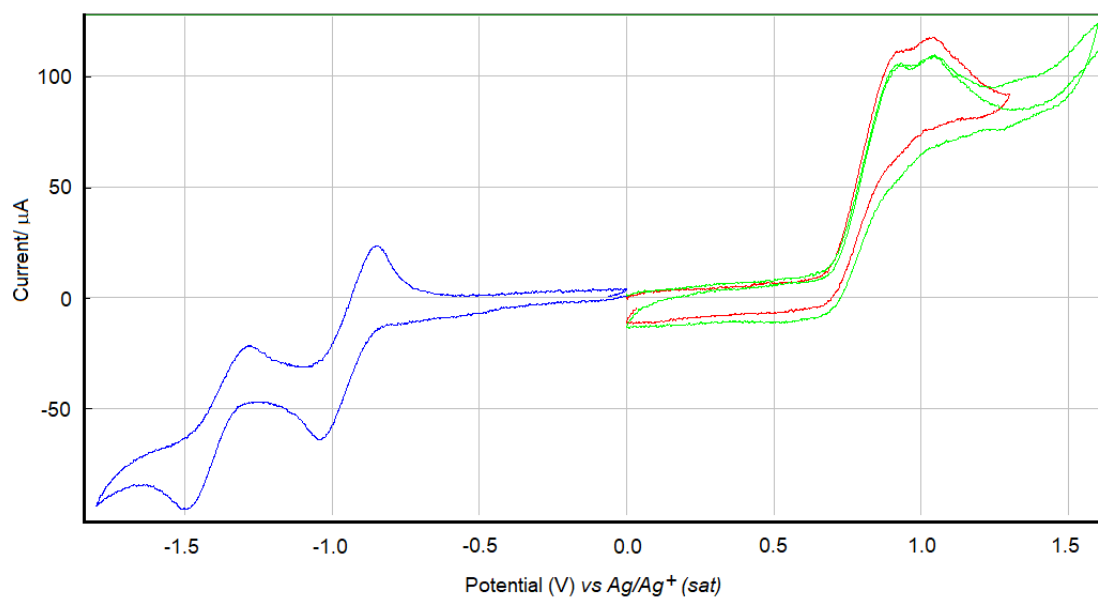

**Figure S61.** Cyclic voltammetry of **2c** in DCM-TBAPF<sub>6</sub>-50mV/s.

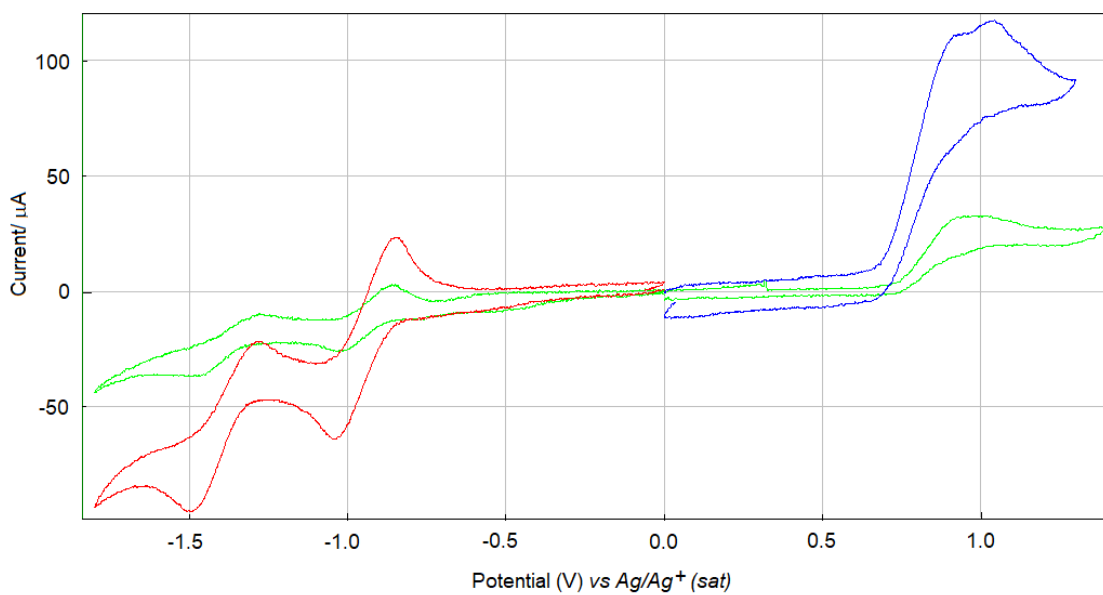

**Figure S62.** Cyclic voltammetry of **2b** (green) and **2c** (red and blue).

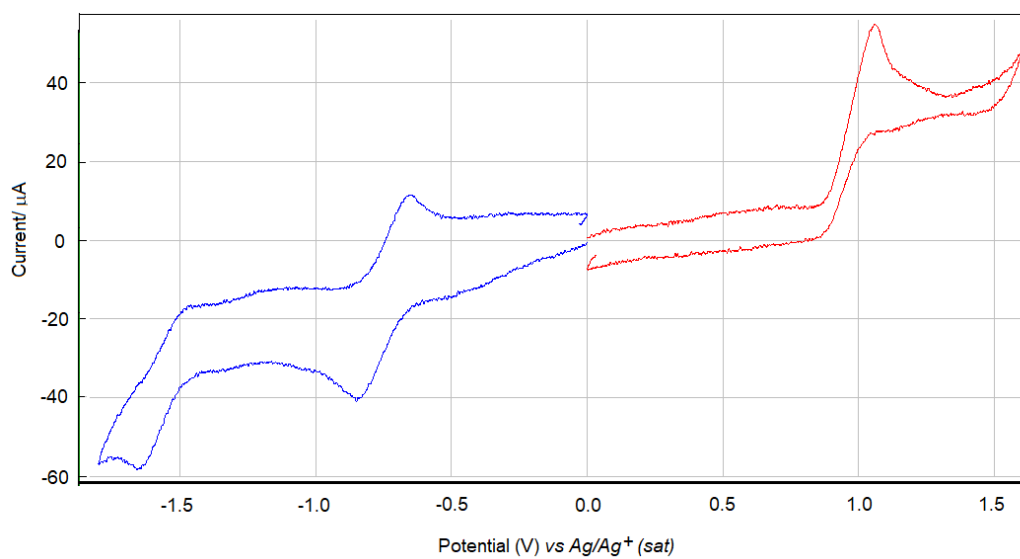

**Figure S63.** Cyclic voltammetry of **3c** in DCM-TBAPF<sub>6</sub>-50mV/s/s-0+1600.

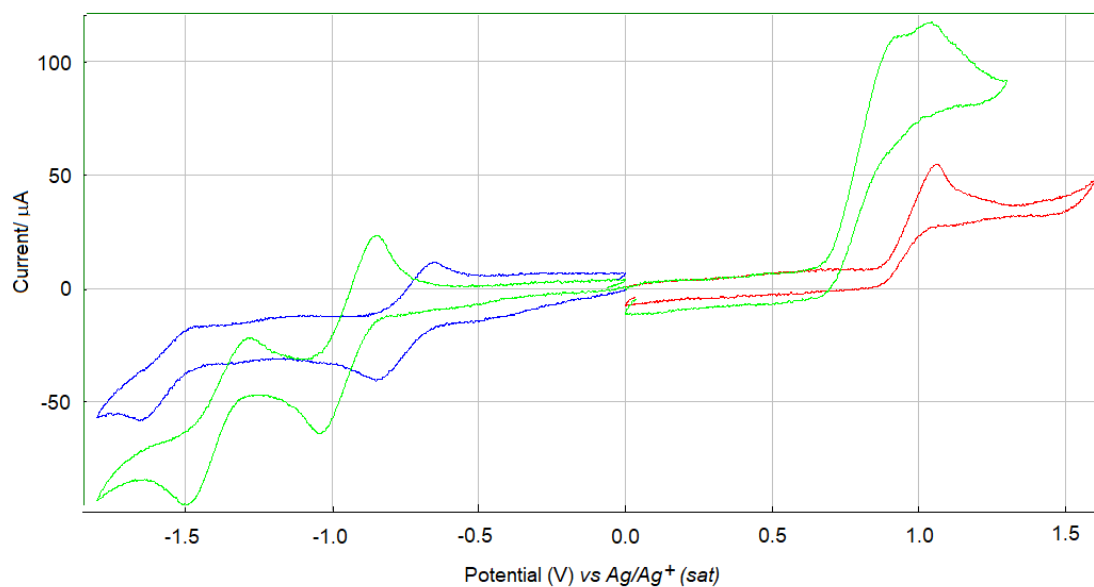

**Figure S64.** Cyclic voltammetry of **2c** (green) and **3c** (blue and red).

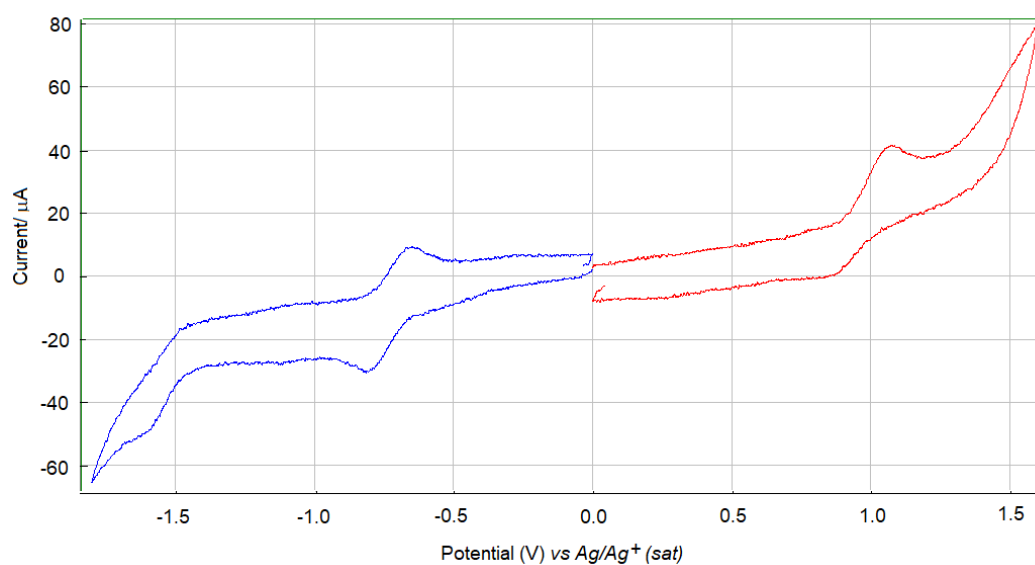

**Figure S65.** Cyclic voltammetry of **3b** in DCM-TBAPF<sub>6</sub>-50mV/s/s-0+1600.

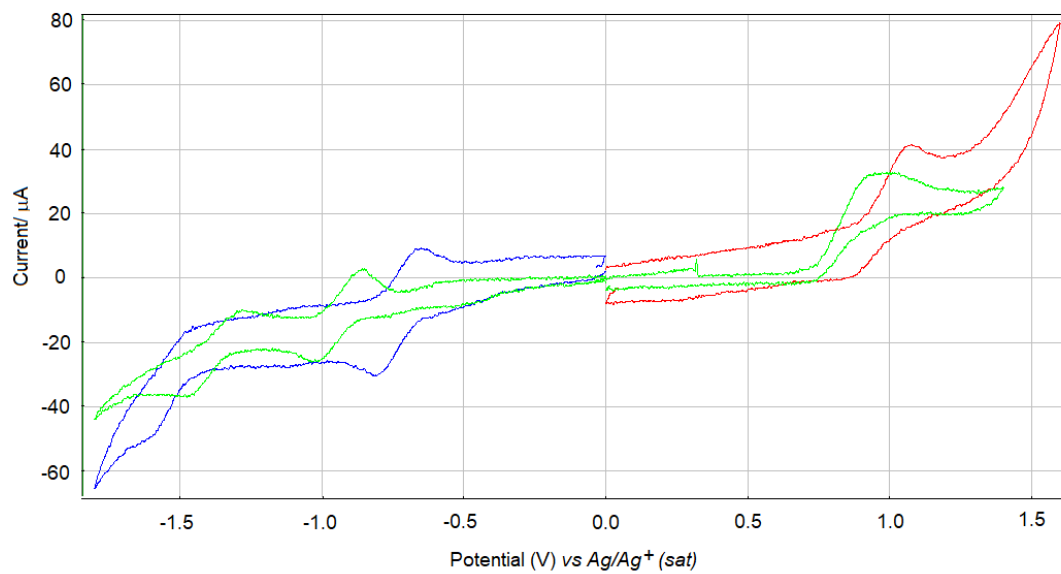

**Figure S66.** Cyclic voltammetry of **2b** (green) and **3b** (blue and red).

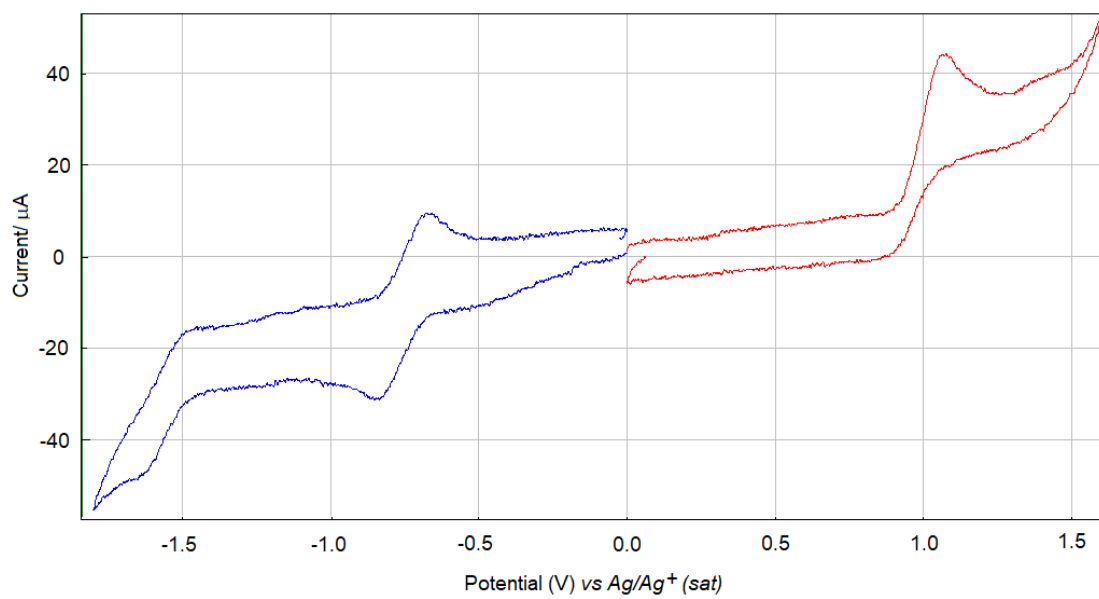

**Figure S67.** Cyclic voltammetry of **3f** in DCM-TBAPF<sub>6</sub>-50mV/s/s-0+1600.

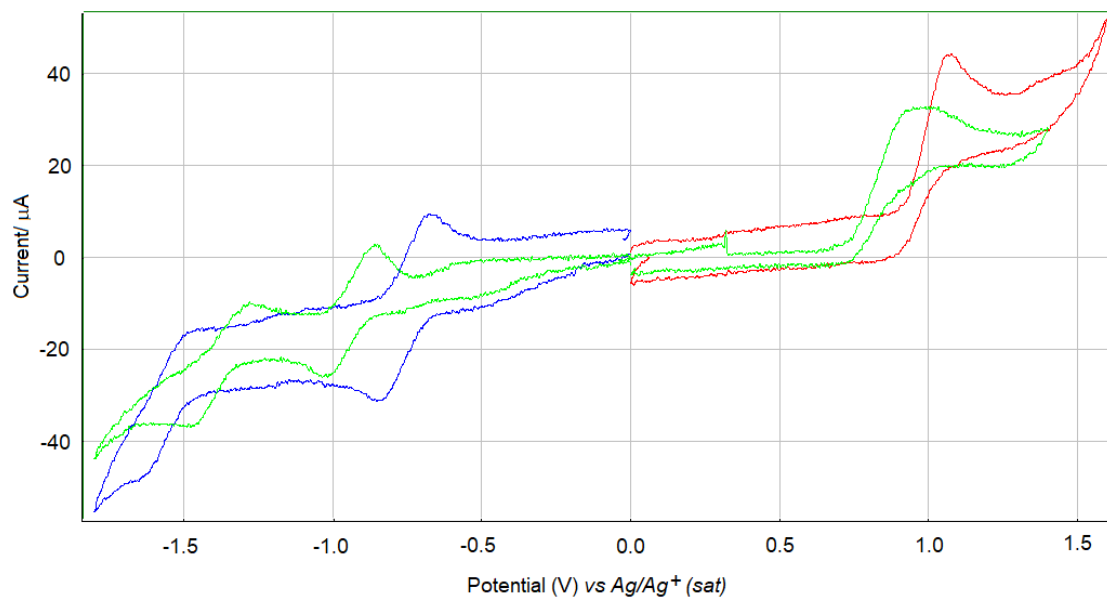

**Figure S68.** Cyclic voltammetry of **2b** (green) and **3f** (blue and red).

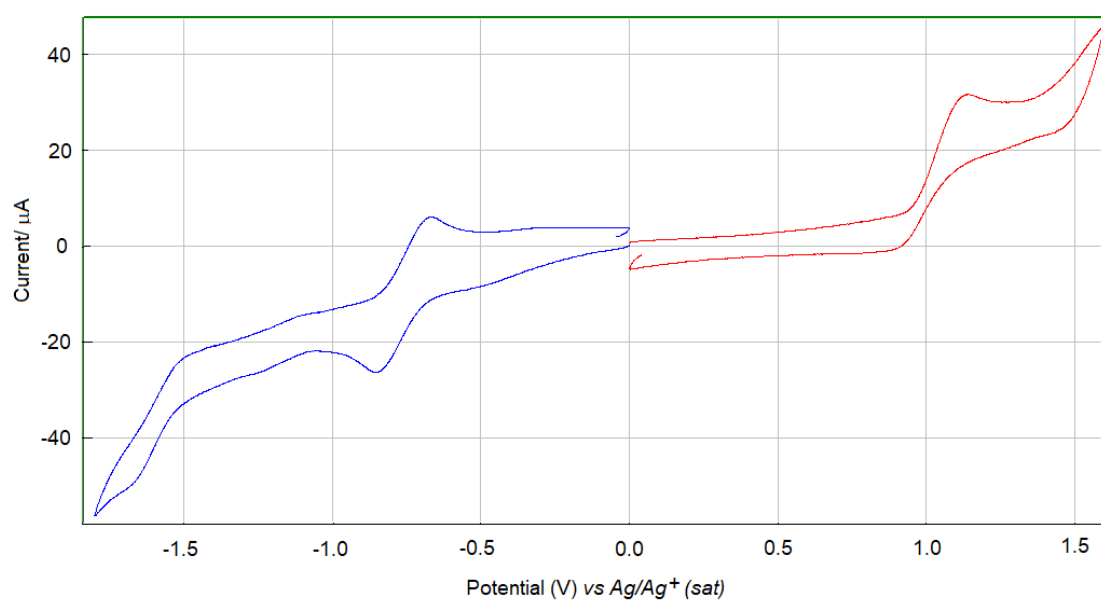

**Figure S69.** Cyclic voltammetry of **3g** in DCM-TBAPF<sub>6</sub>-50mV/s/s-0+1600.



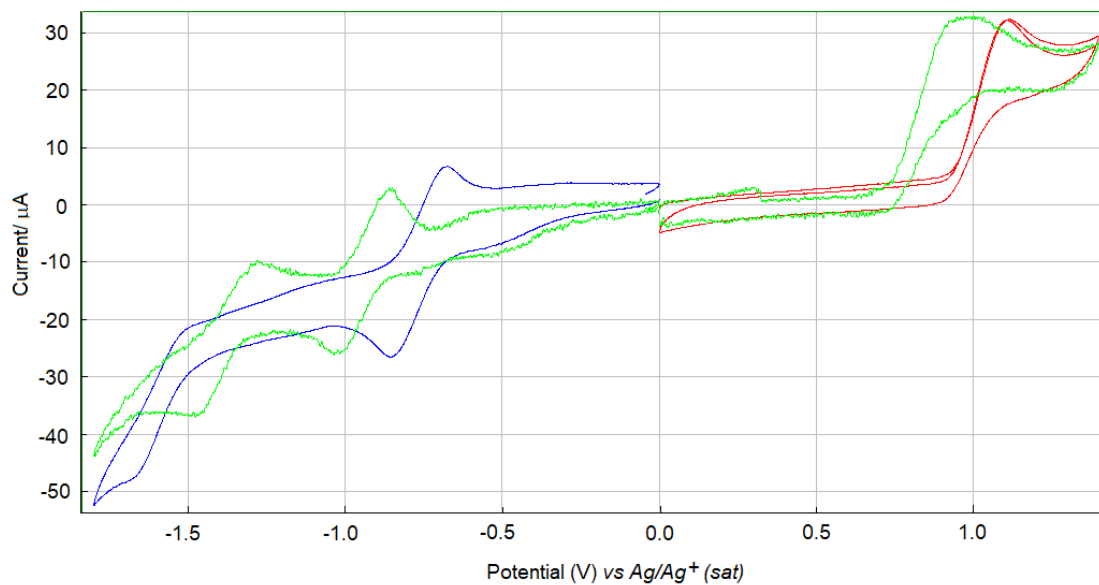

**Figure S70.** Cyclic voltammetry of **2b** (green) and **3g** (blue and red).

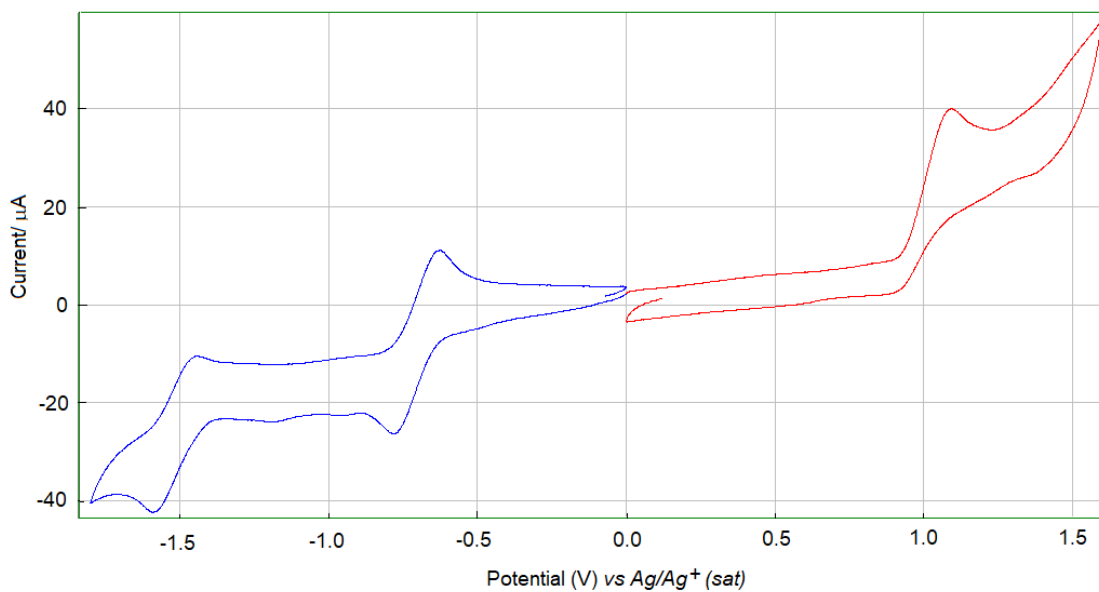

**Figure S71.** Cyclic voltammetry of **3h** in DCM-TBAPF<sub>6</sub>-50mV/s/s-0+1400.

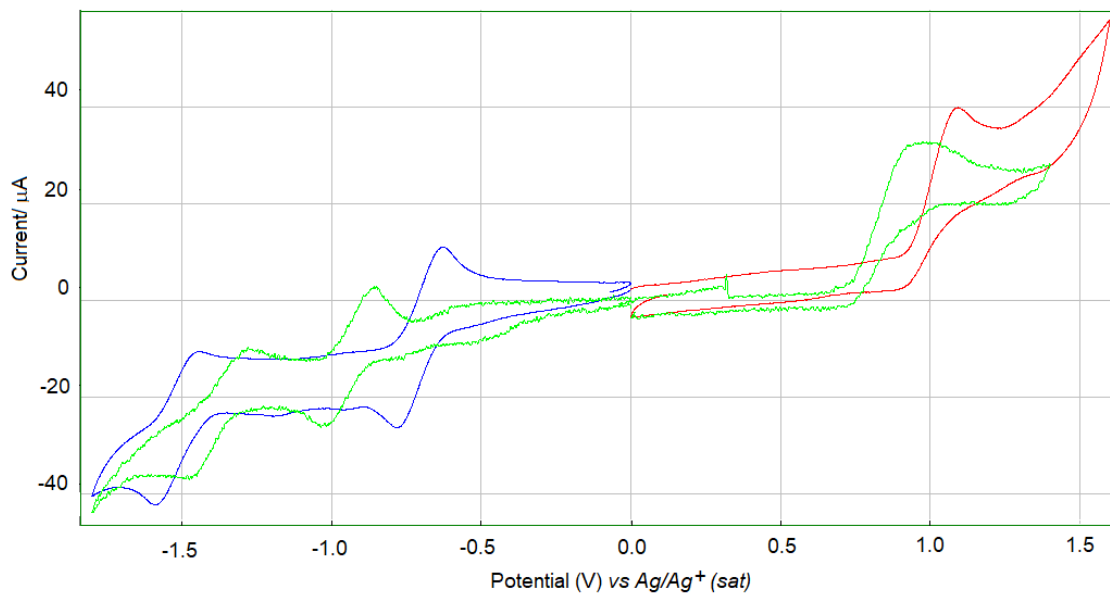

**Figure S72.** Cyclic voltammetry of **2b** (green) and **3h** (blue and red).

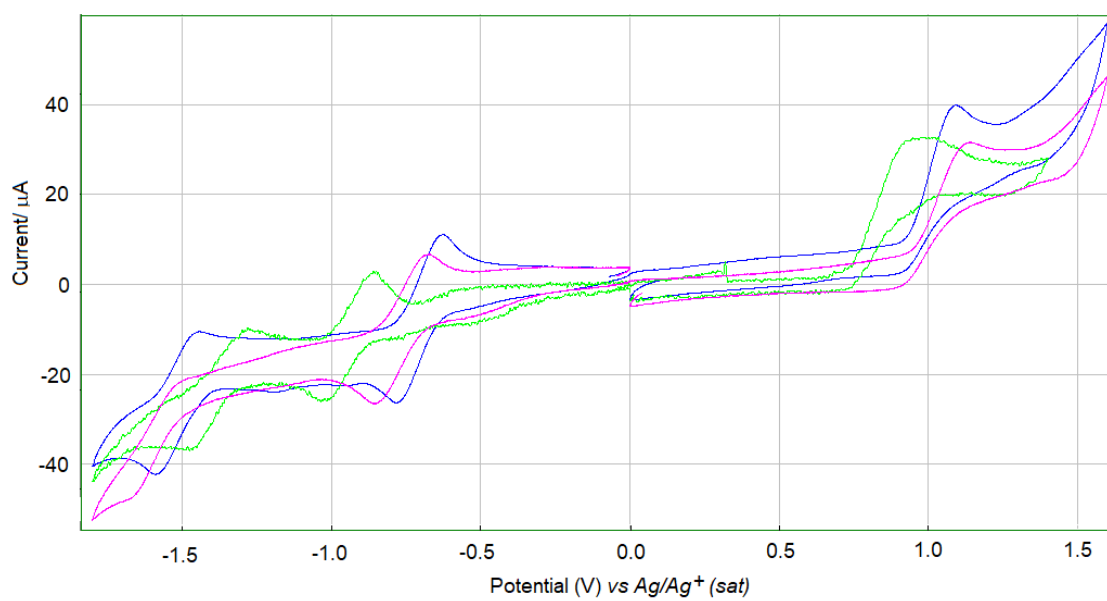

**Figure S73.** Cyclic voltammetry of **2b** (green), **3g** (pink) and **3h** (blue).

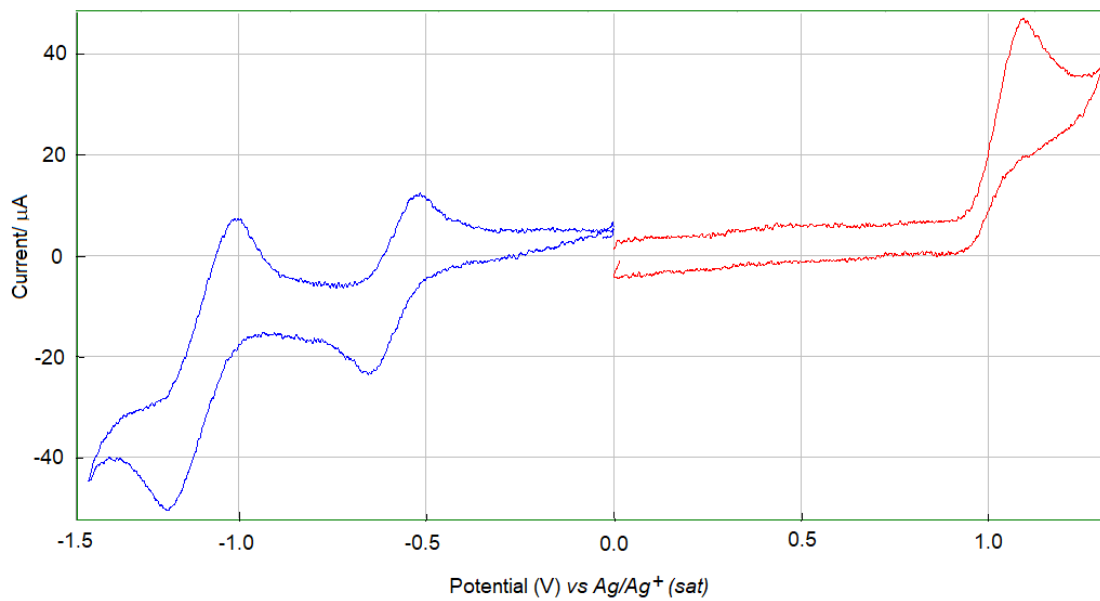

**Figure S74.** Cyclic voltammetry of **3i** in DCM-TBAPF<sub>6</sub>-50mV/s(Pt/Pt).

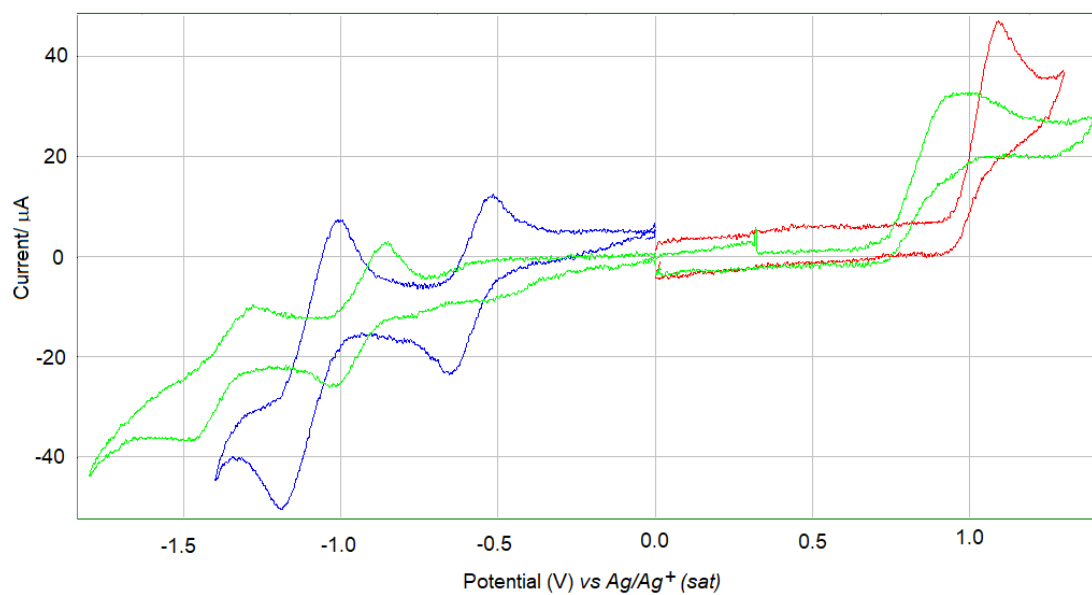

**Figure S75.** Cyclic voltammetry of **2b** (green) and **3i** (blue and red).

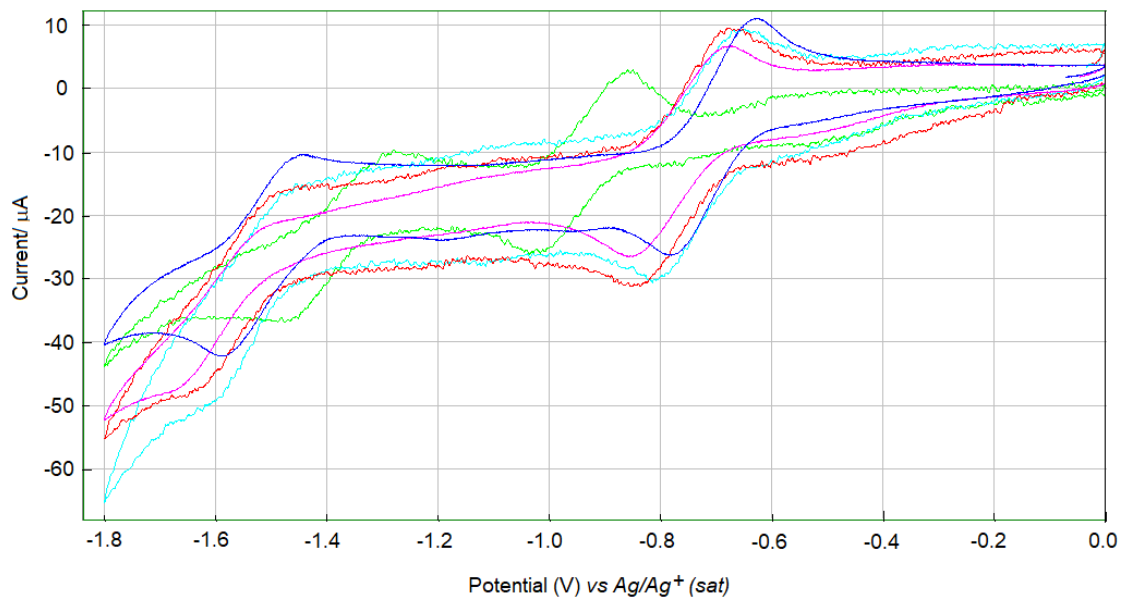

**Figure S76.** Cyclic voltammetry (cathodic) of **3b** (light blue), **3f** (red), **3g** (pink), **3h** (dark blue), and **3i** (green).

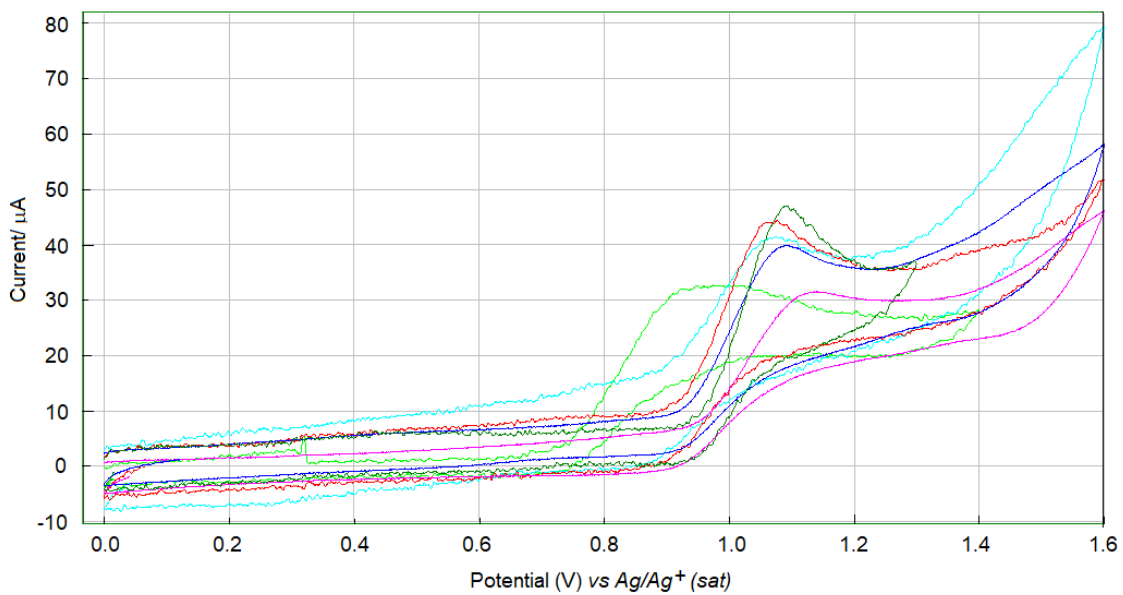

**Figure S77.** Cyclic voltammetry (anodic) of **3b** (light blue), **3f** (red), **3g** (pink), **3h** (dark blue), and **3i** (green).

**12.  $^1\text{H}$  and  $^{13}\text{C}$  NMR spectra of all new synthesized compounds (HMBC, HSQC, COSY, NOESY and DOSY of selected compounds are also included)**

Thread **2a** ( $^1\text{H}$  NMR, 400 MHz,  $\text{CDCl}_3$ , 298 K)

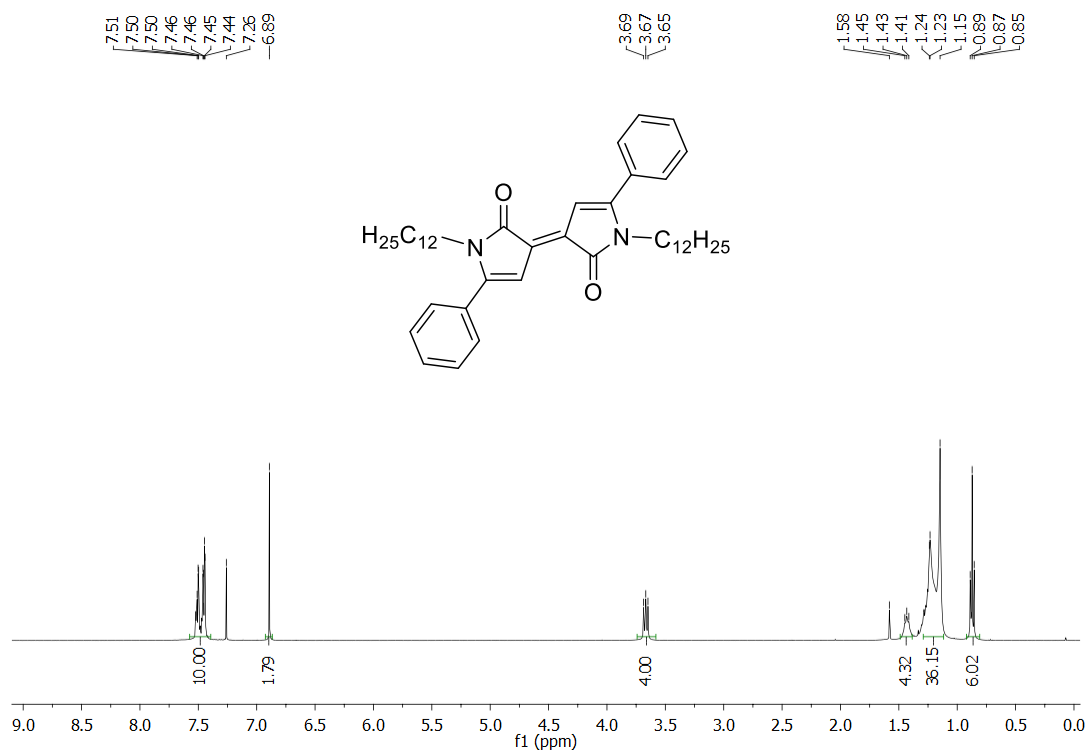

Thread **2a** ( $^{13}\text{C}$  RMN, 100 MHz,  $\text{CDCl}_3$ , 298 K)

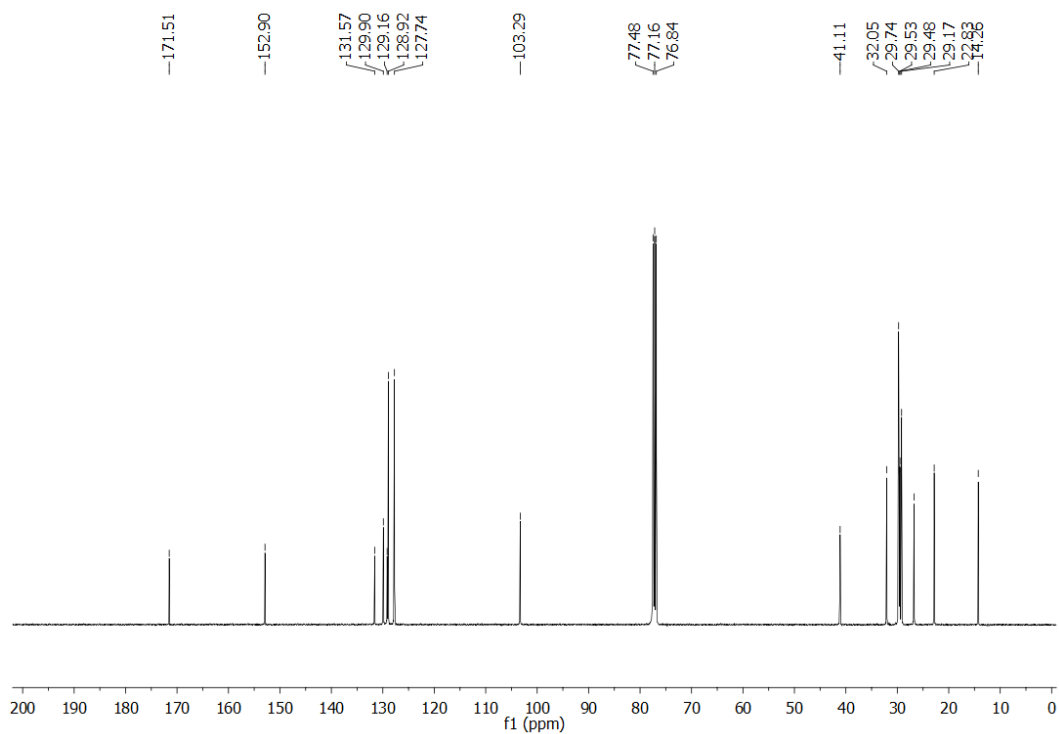

Thread **2b** ( $^1\text{H}$  NMR, 400 MHz,  $\text{CDCl}_3$ , 298 K)

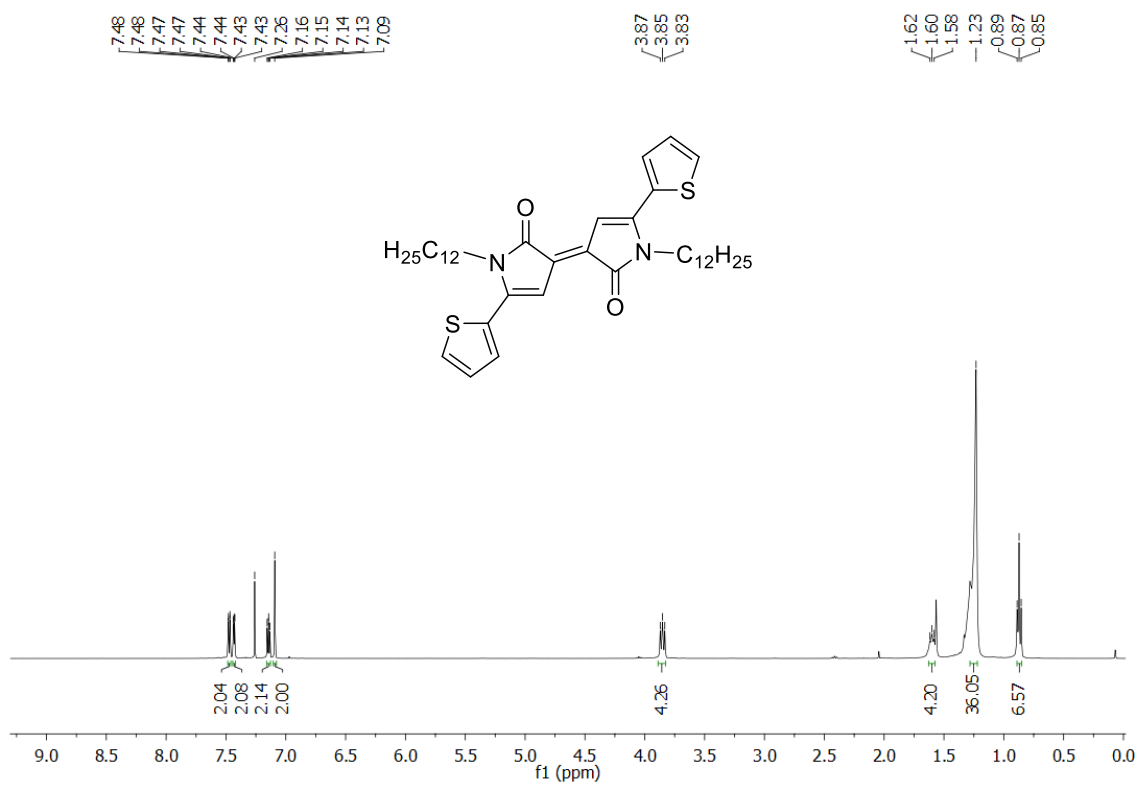

Thread **2b** ( $^{13}\text{C}$  RMN, 100 MHz,  $\text{CDCl}_3$ , 298 K)

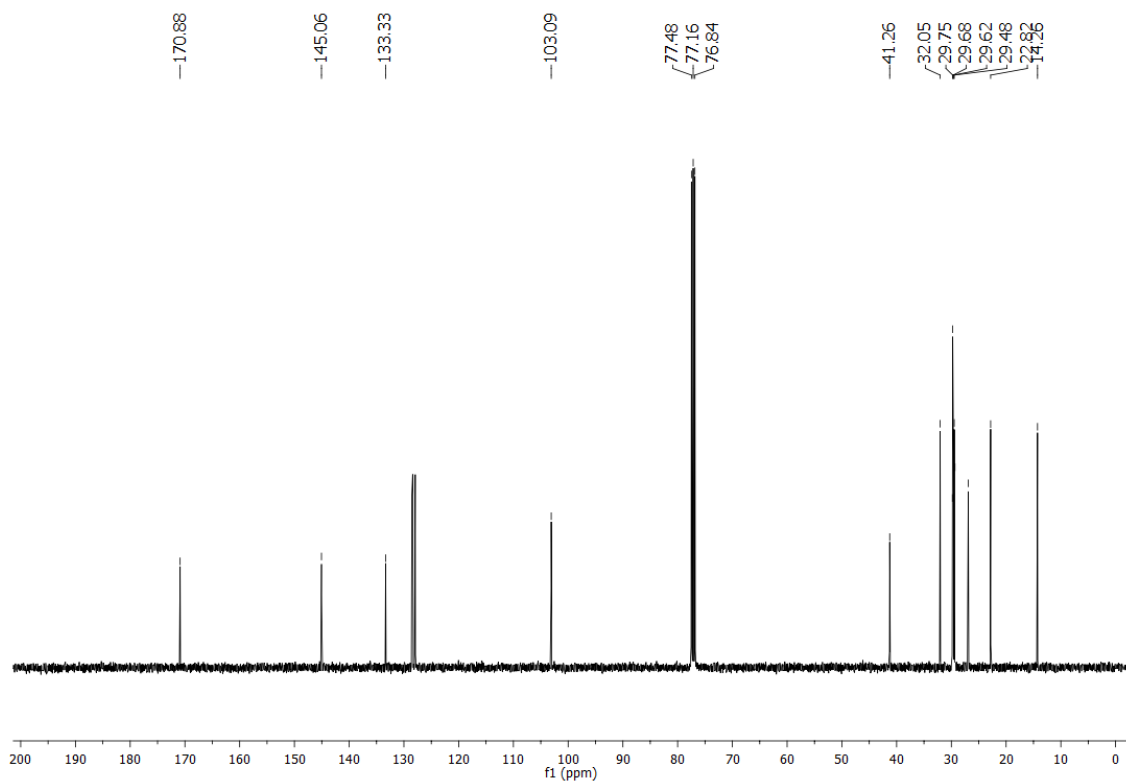

Thread **2c** ( $^1\text{H}$  NMR, 400 MHz,  $\text{CDCl}_3$ , 298 K)

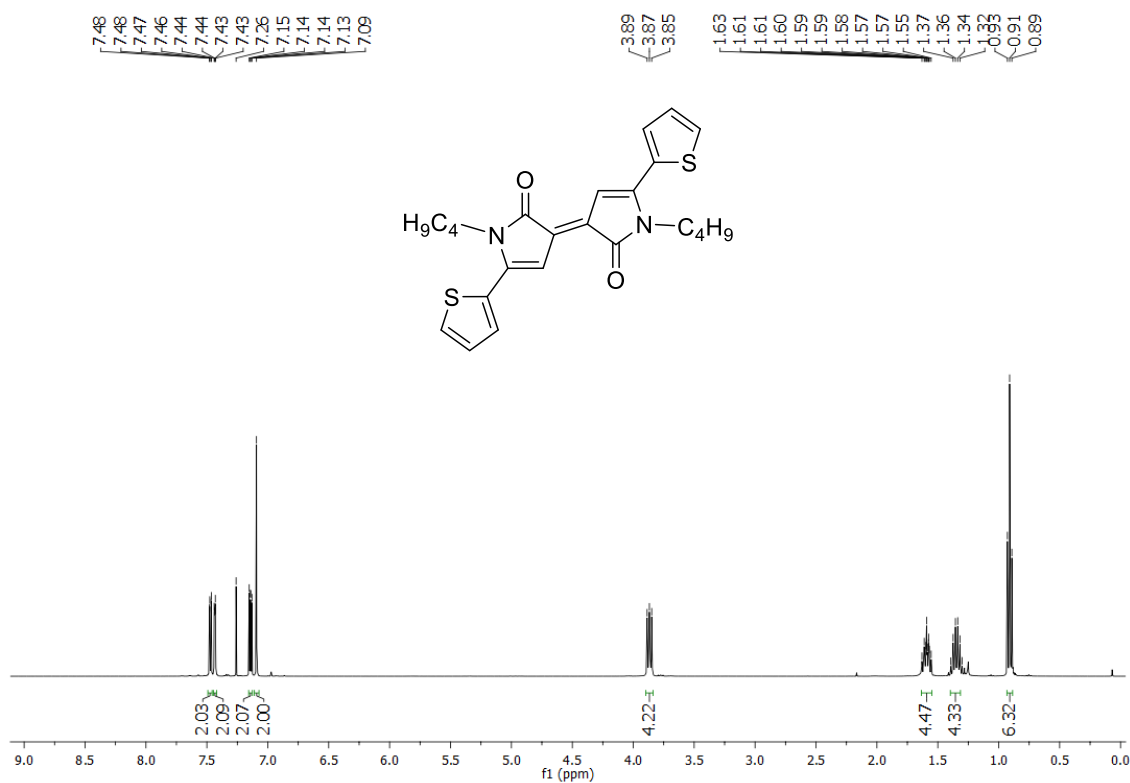

Thread **2c** ( $^{13}\text{C}$  RMN, 100 MHz,  $\text{CDCl}_3$ , 298 K)

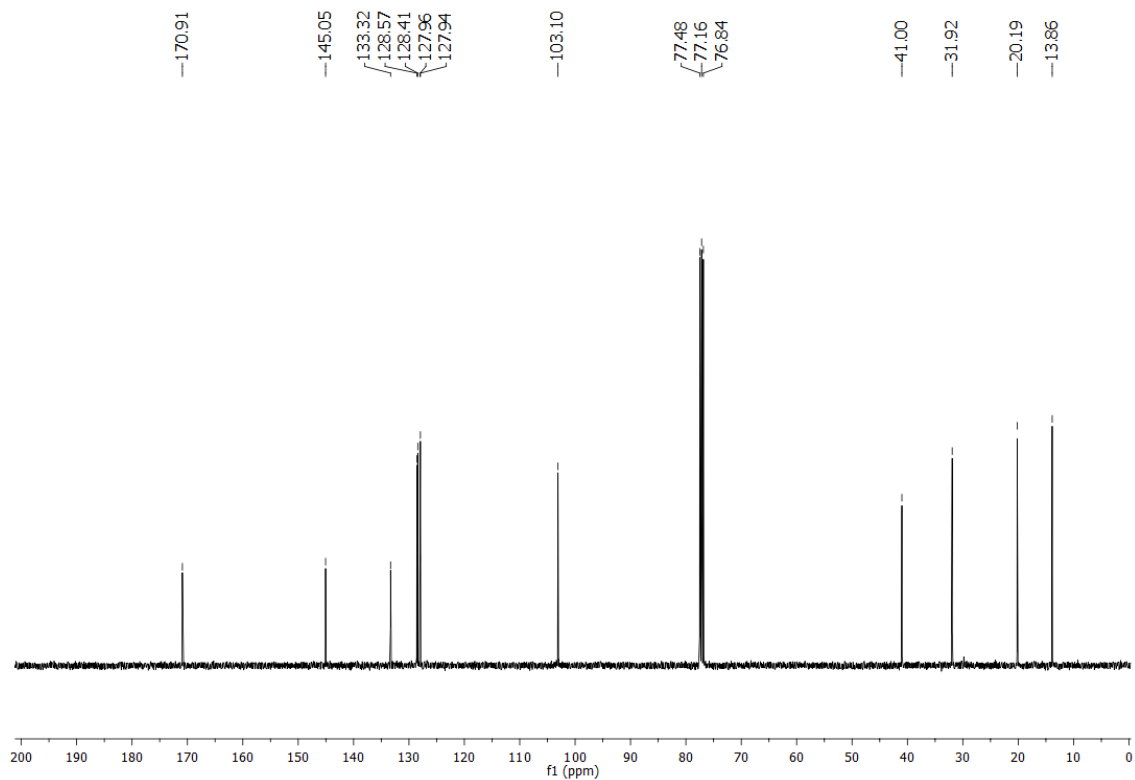

Thread **2c** ( $^1\text{H}, ^1\text{H}$ -COSY, 400 MHz,  $\text{CDCl}_3$ , 298 K)

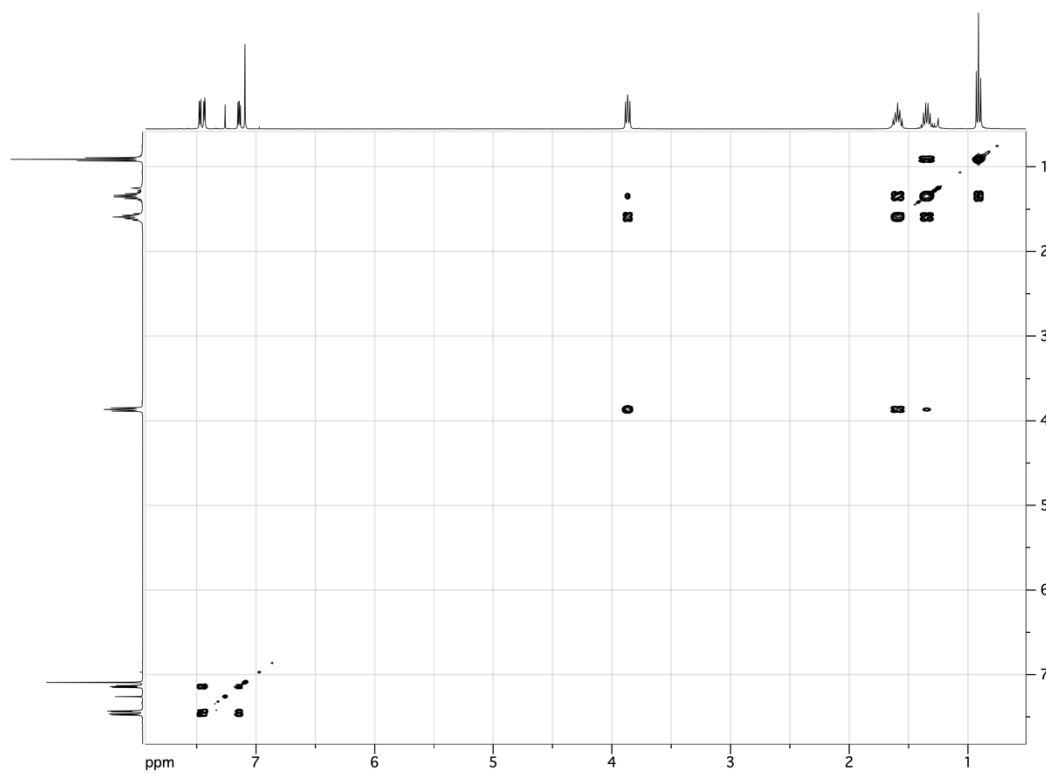

Thread **2c** ( $^1\text{H}, ^1\text{H}$ -NOESY, 400 MHz,  $\text{CDCl}_3$ , 298 K)

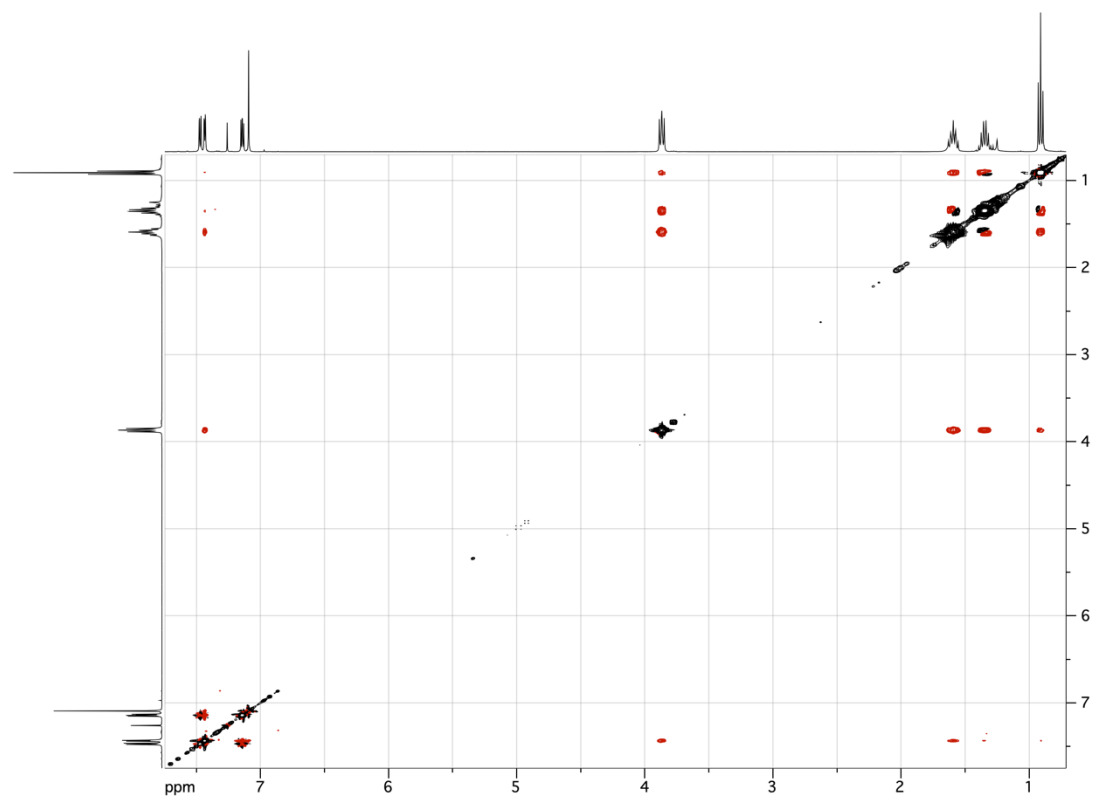



Thread **2d** ( $^1\text{H}$  NMR, 400 MHz,  $\text{CDCl}_3$ , 298 K)

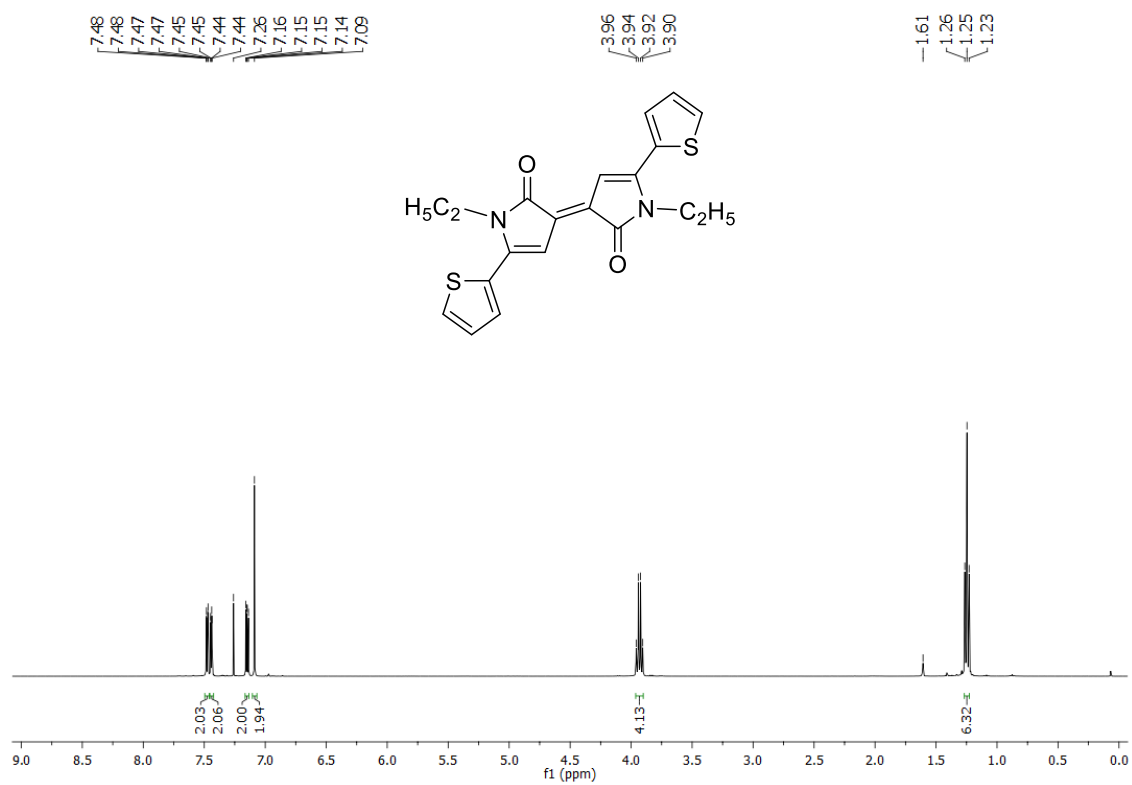

Thread **2d** ( $^{13}\text{C}$  RMN, 100 MHz,  $\text{CDCl}_3$ , 298 K)

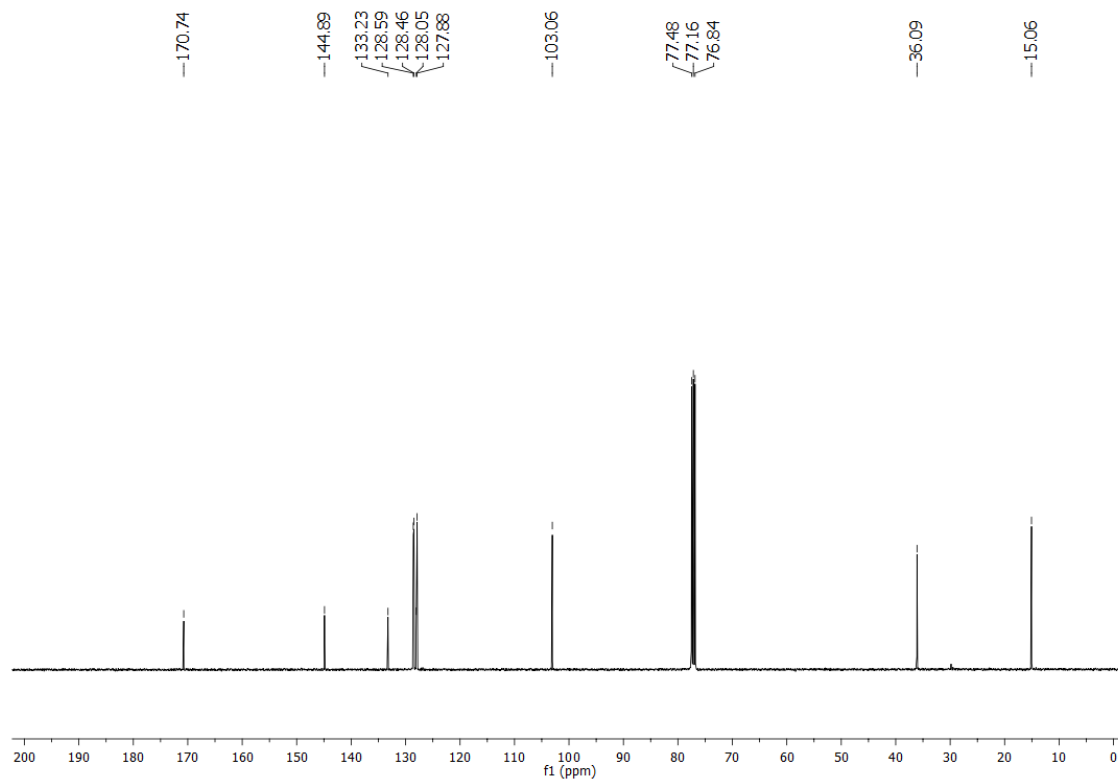

Rotaxane **3a** ( $^1\text{H}$  NMR, 400 MHz,  $\text{CDCl}_3$ , 298 K)

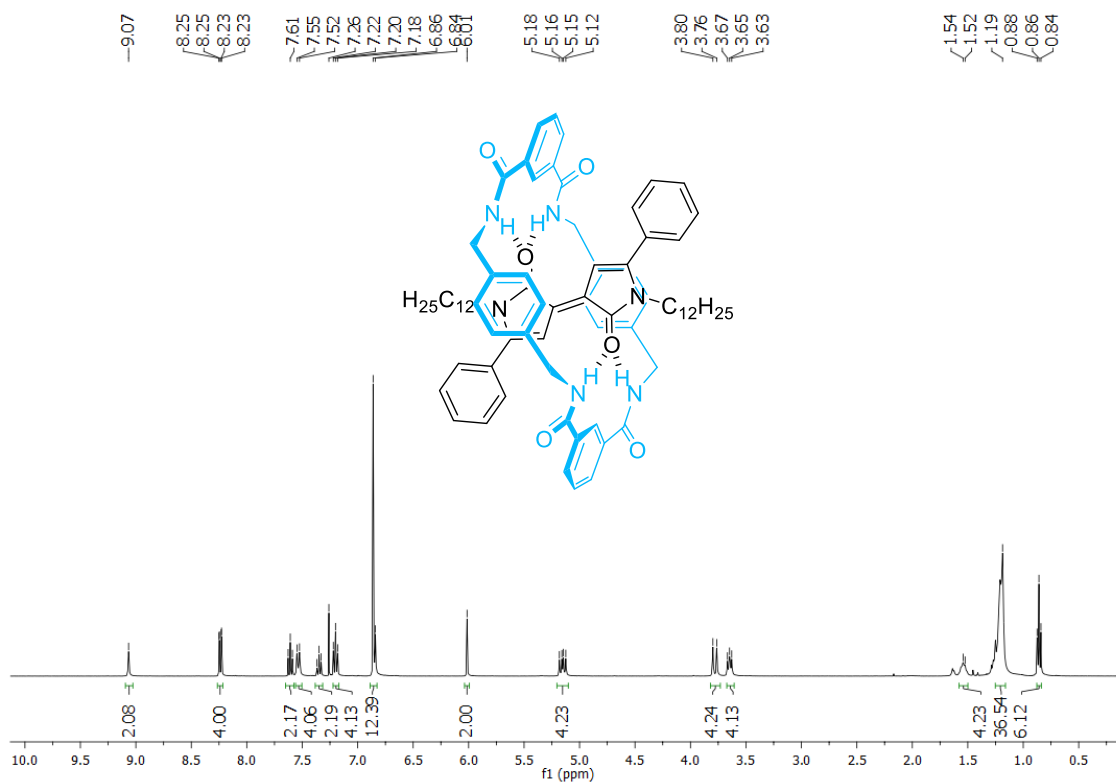

Rotaxane **3a** ( $^{13}\text{C}$  RMN, 100 MHz,  $\text{CDCl}_3$ , 298 K)

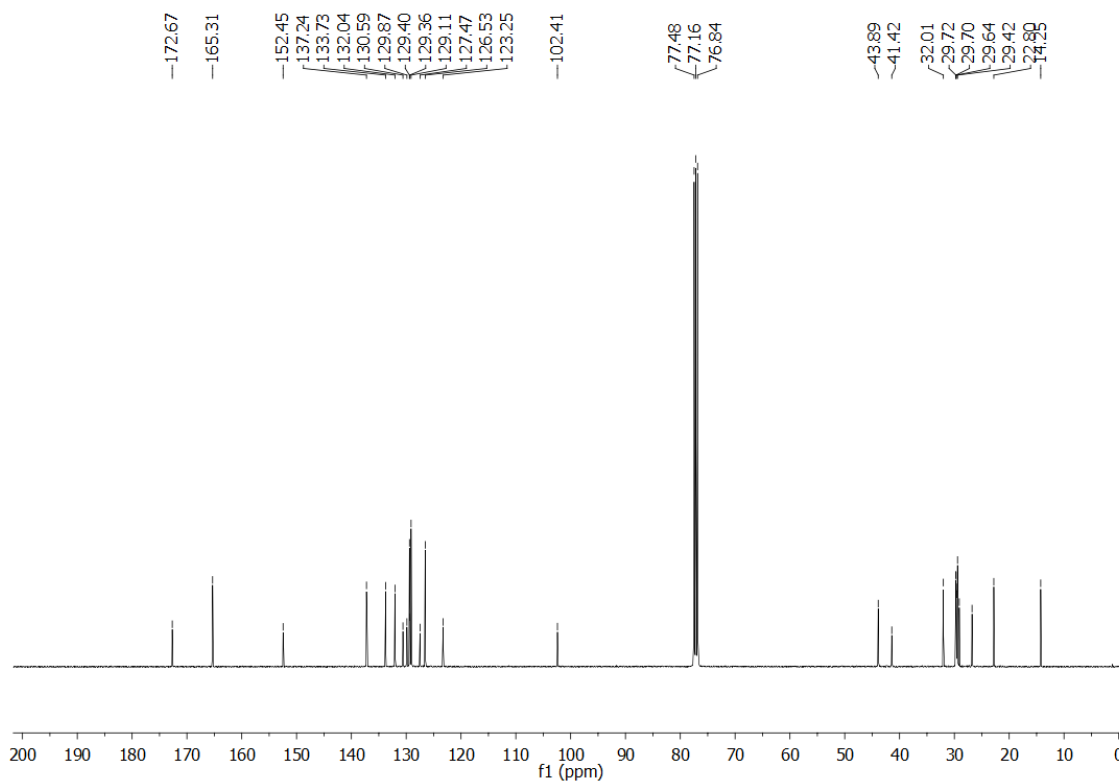

Rotaxane **3a** ( $^1\text{H},^1\text{H}$ -COSY, 400 MHz,  $\text{CDCl}_3$ , 298 K)

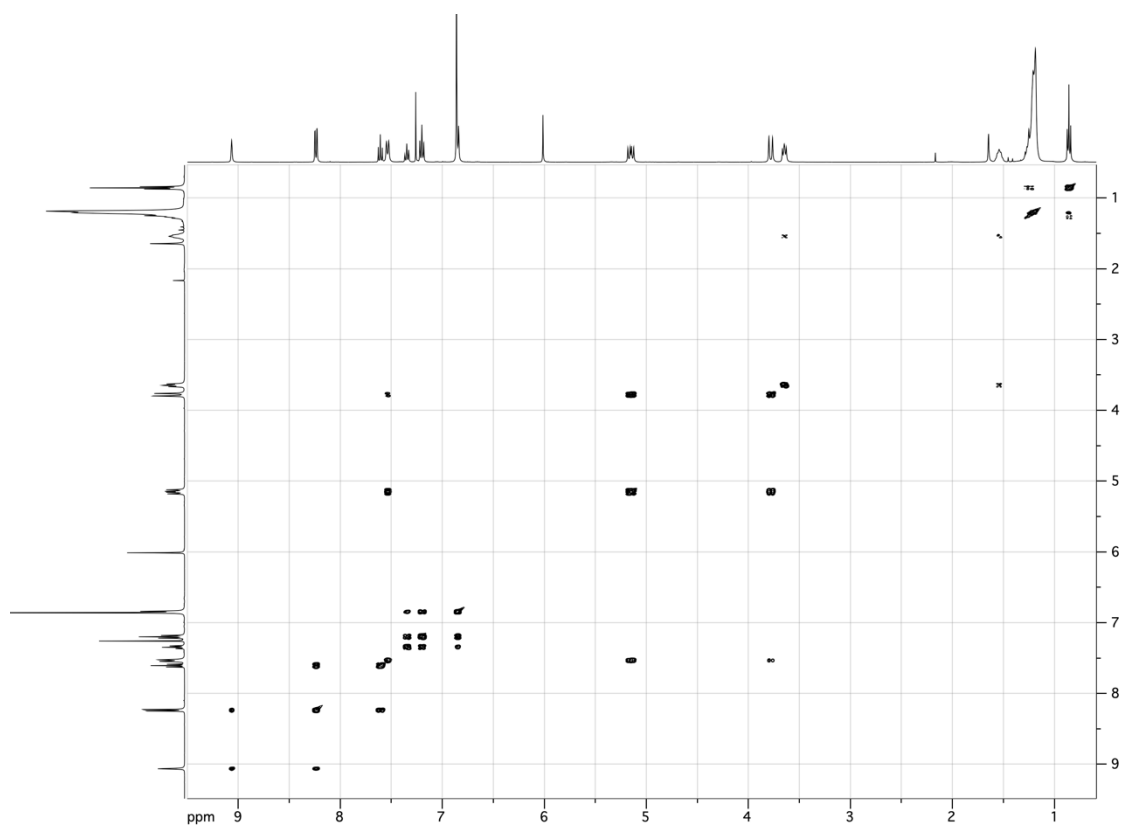

Rotaxane **3a** ( $^1\text{H},^1\text{H}$ -NOESY, 400 MHz,  $\text{CDCl}_3$ , 298 K)

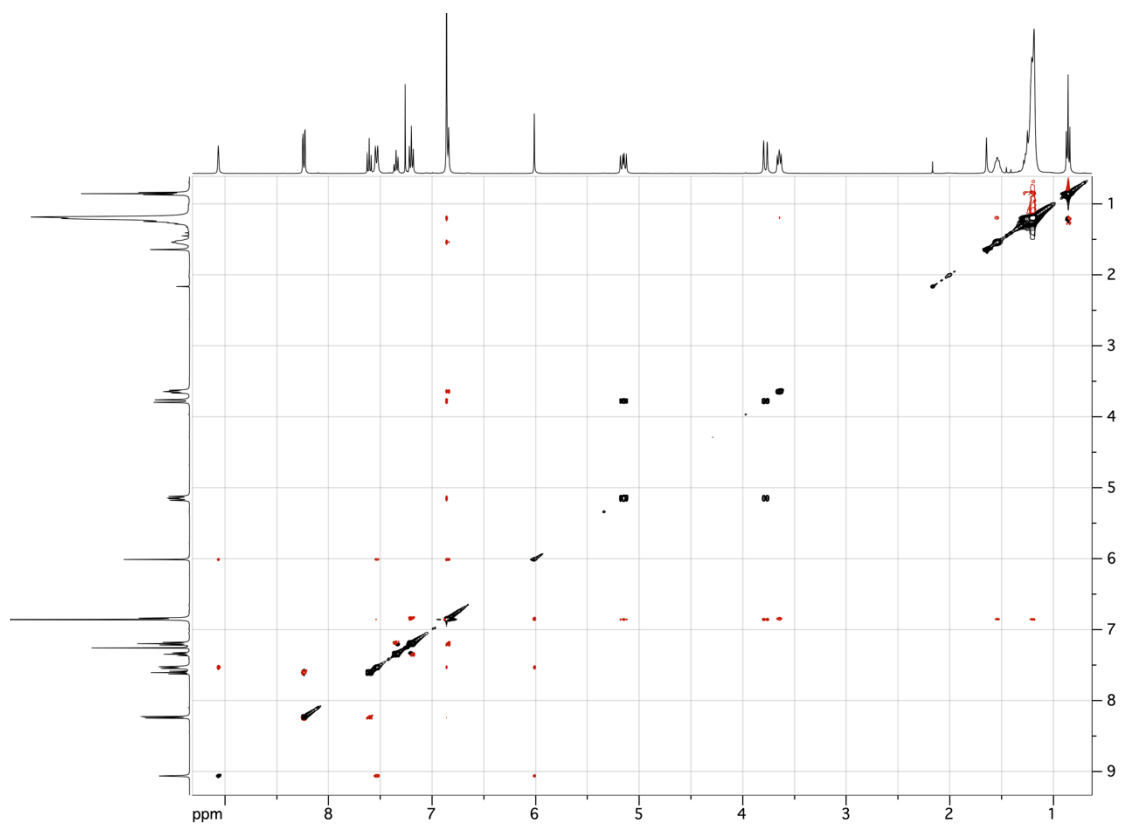

Rotaxane **3a** (HSQC, 400 MHz, CDCl<sub>3</sub>, 298 K)

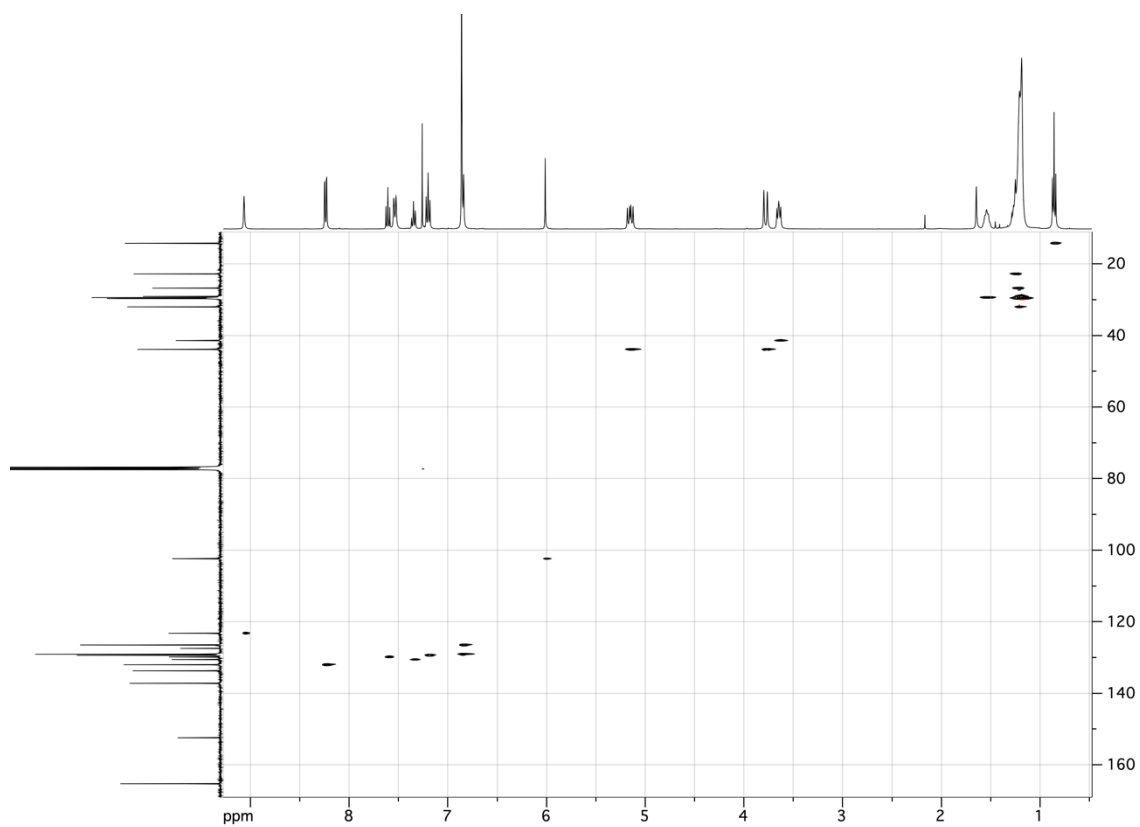

Rotaxane **3b** ( $^1\text{H}$  NMR, 400 MHz,  $\text{CDCl}_3$ , 298 K)

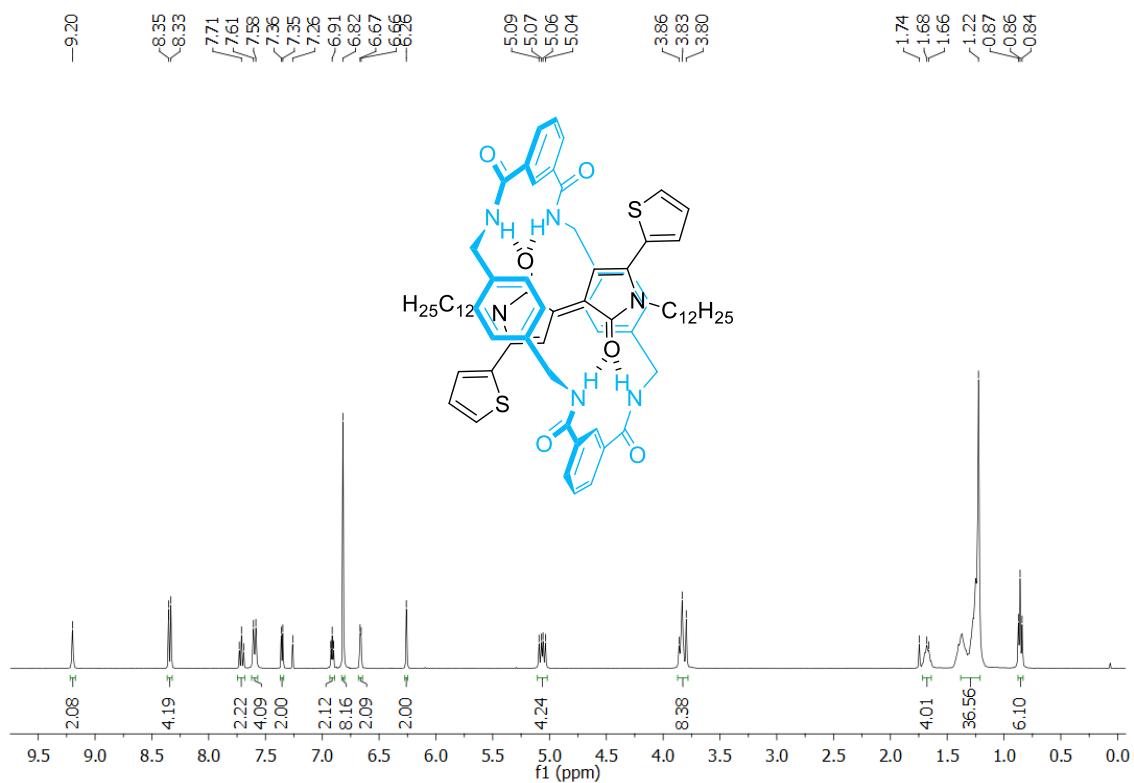

Rotaxane **3b** ( $^{13}\text{C}$  RMN, 100 MHz,  $\text{CDCl}_3$ , 298 K)

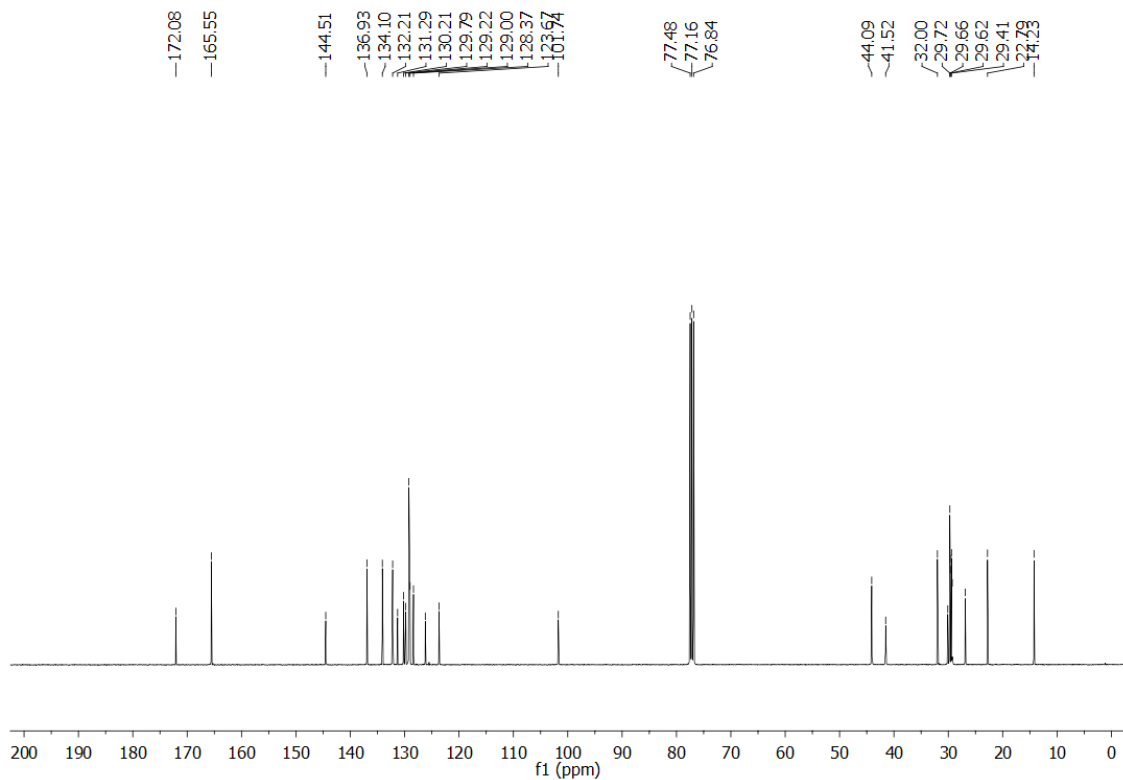

Rotaxane **3b** ( $^1\text{H}, ^1\text{H}$ -COSY, 400 MHz,  $\text{CDCl}_3$ , 298 K)

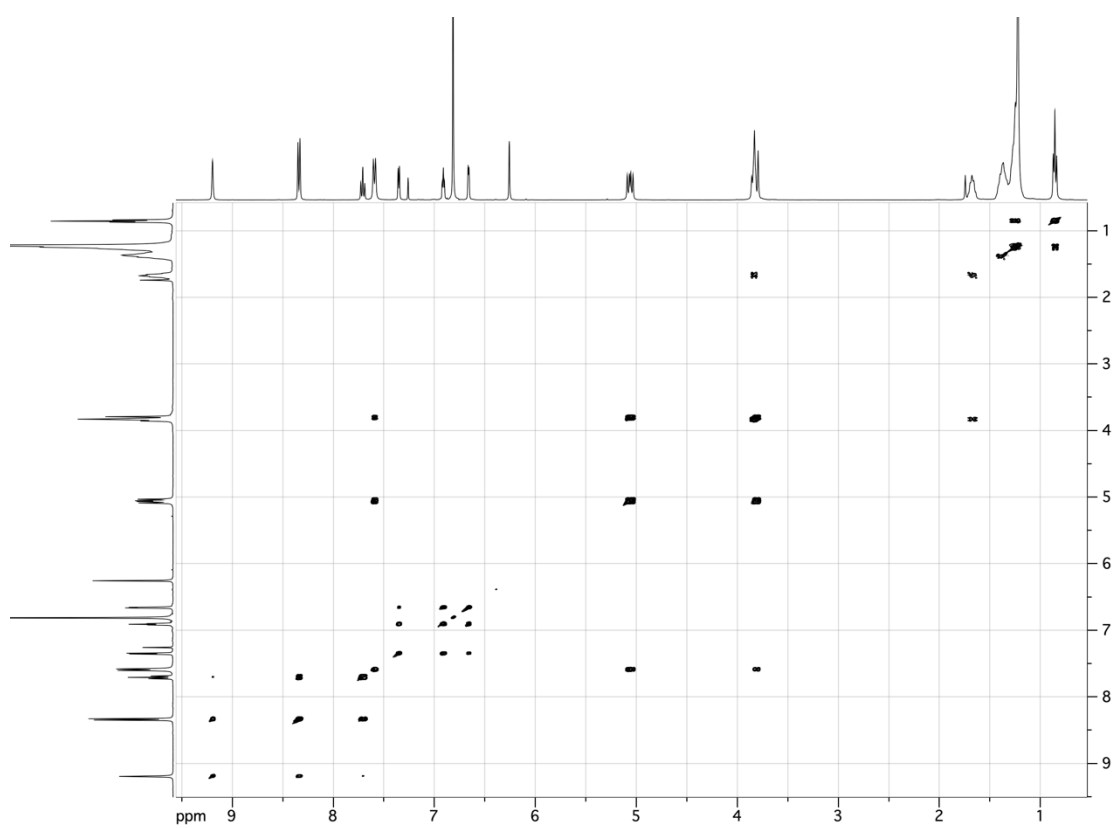

Rotaxane **3b** ( $^1\text{H}, ^1\text{H}$ -NOESY, 400 MHz,  $\text{CDCl}_3$ , 298 K)

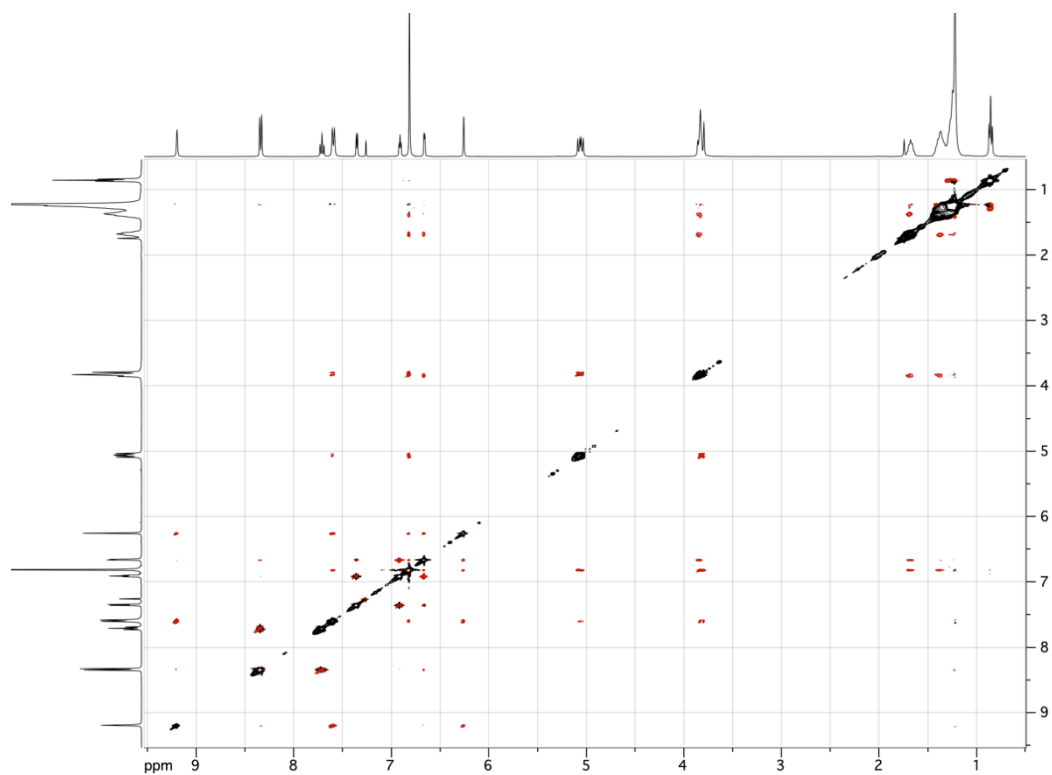

Rotaxane **3b** (HSQC, 400 MHz, CDCl<sub>3</sub>, 298 K)

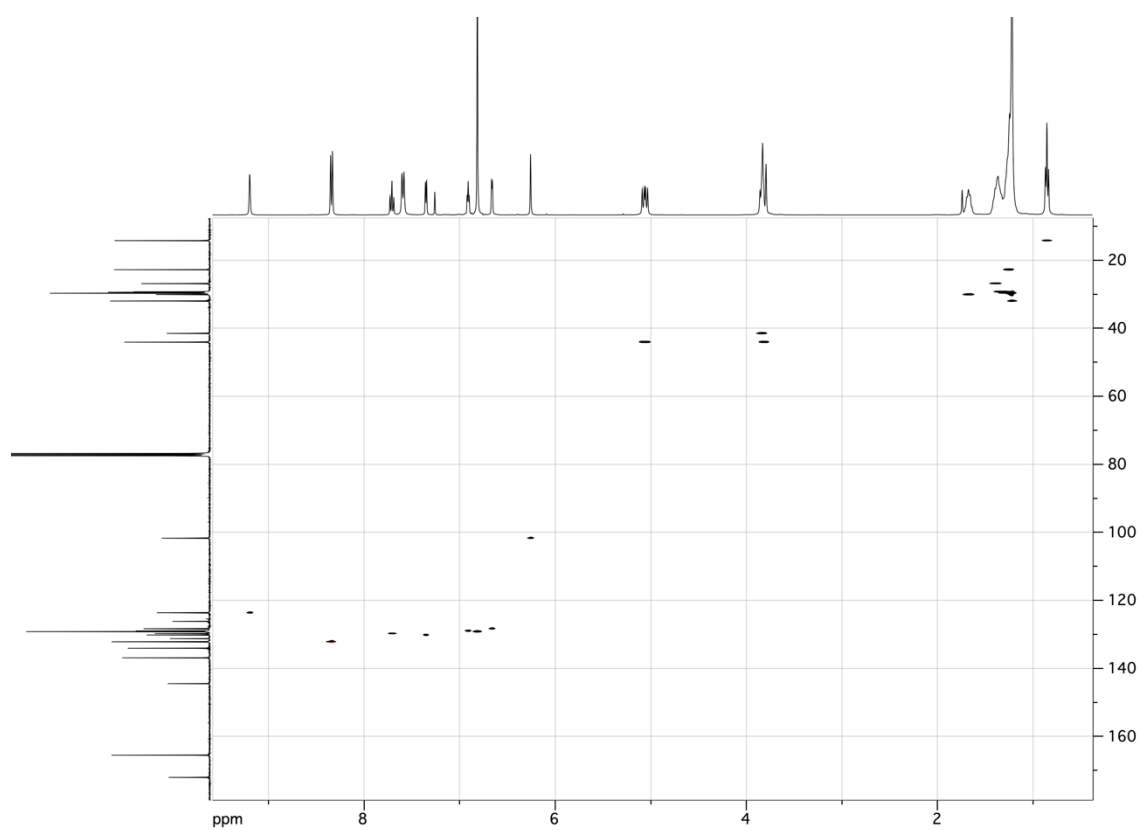

Rotaxane **3c** ( $^1\text{H}$  NMR, 400 MHz,  $\text{CDCl}_3$ , 298 K)

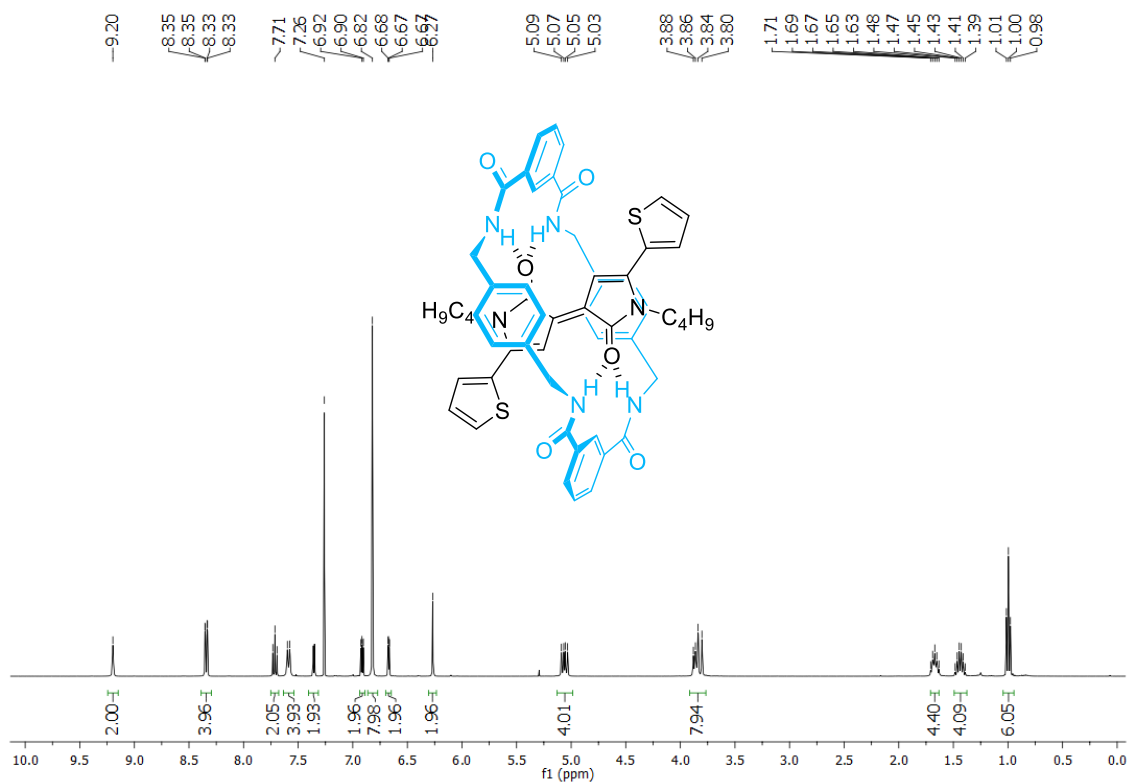

Rotaxane **3c** ( $^{13}\text{C}$  RMN, 100 MHz,  $\text{CDCl}_3$ , 298 K)

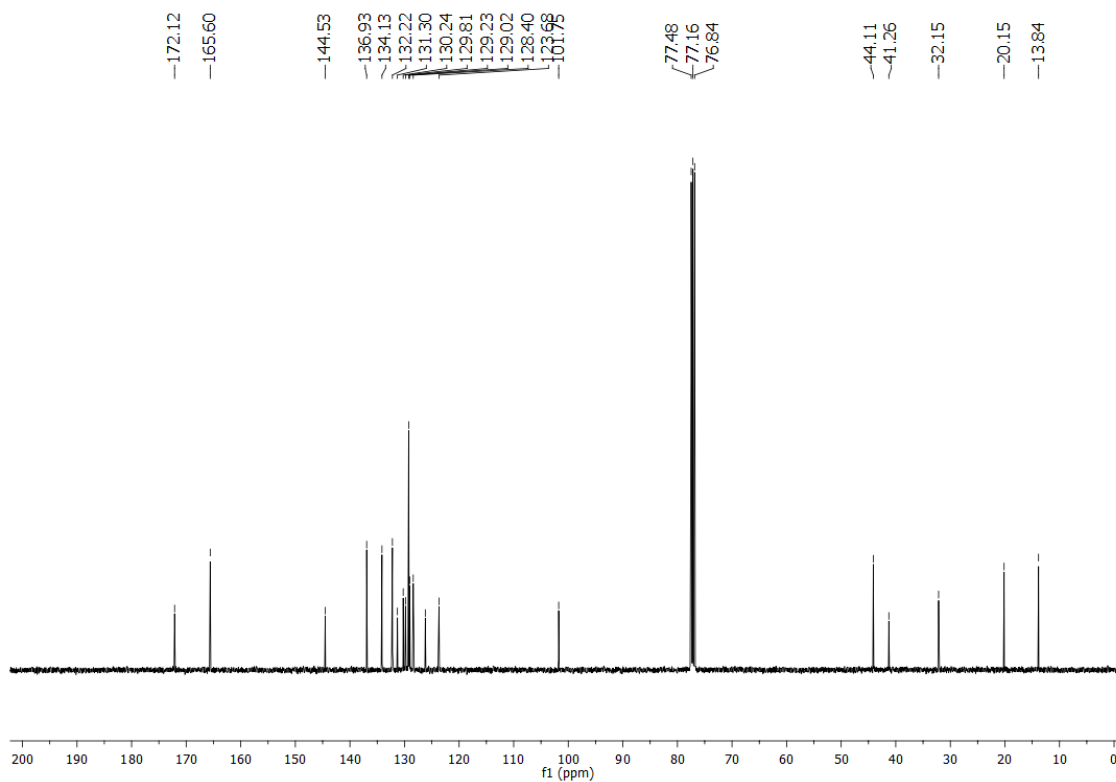



Rotaxane **3c** ( $^1\text{H}, ^1\text{H}$ -COSY, 400 MHz,  $\text{CDCl}_3$ , 298 K)

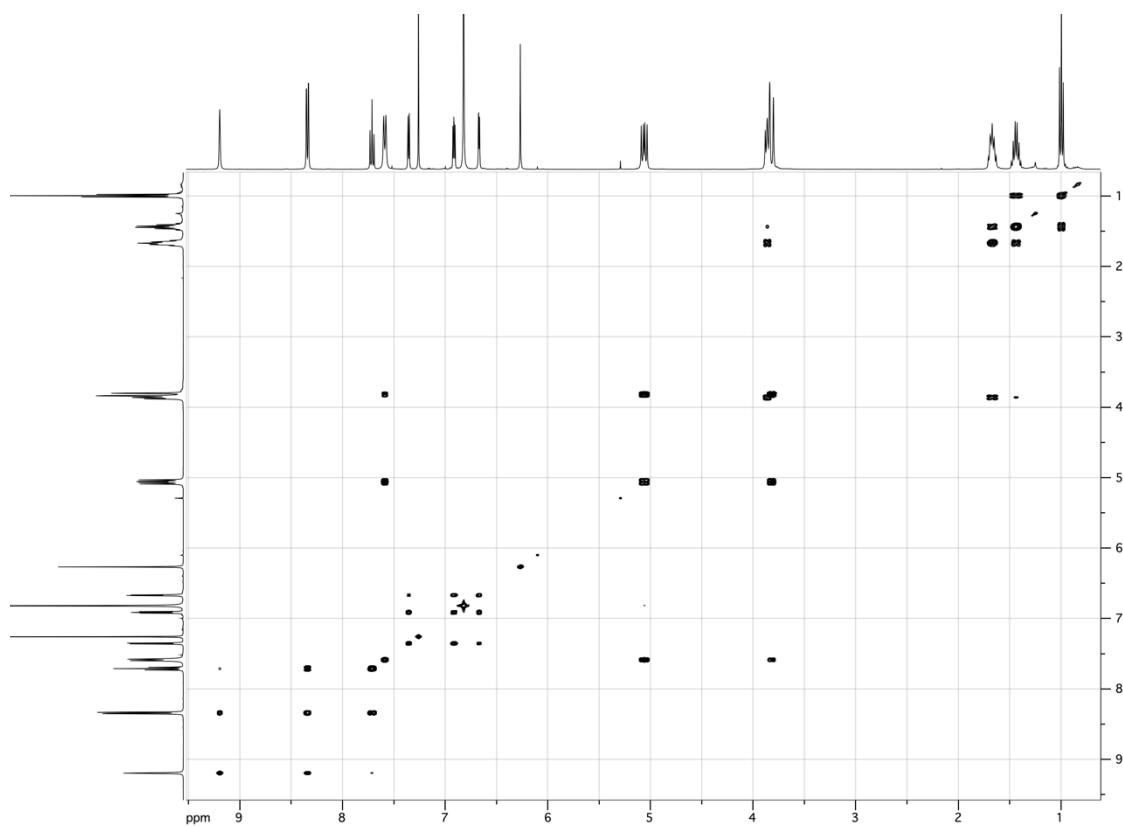

Rotaxane **3c** ( $^1\text{H}, ^1\text{H}$ -NOESY, 400 MHz,  $\text{CDCl}_3$ , 298 K)

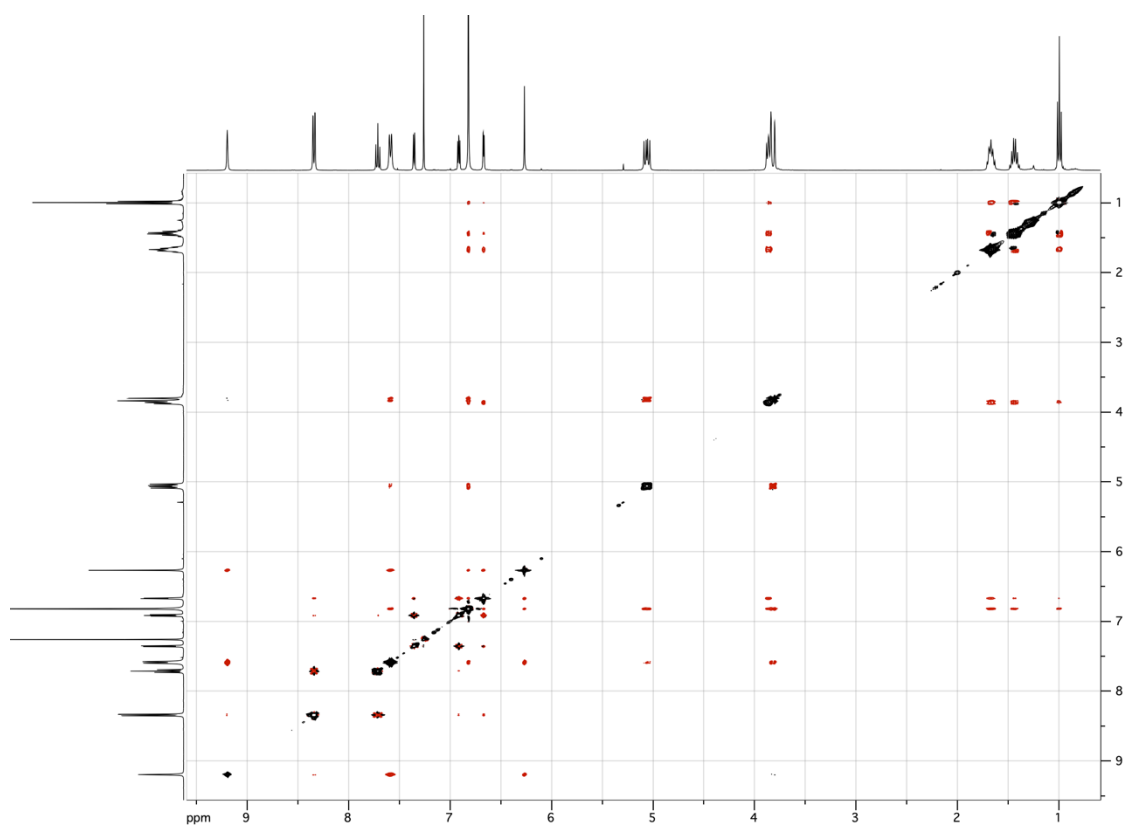

Rotaxane **3c** (HSQC, 400 MHz, CDCl<sub>3</sub>, 298 K)

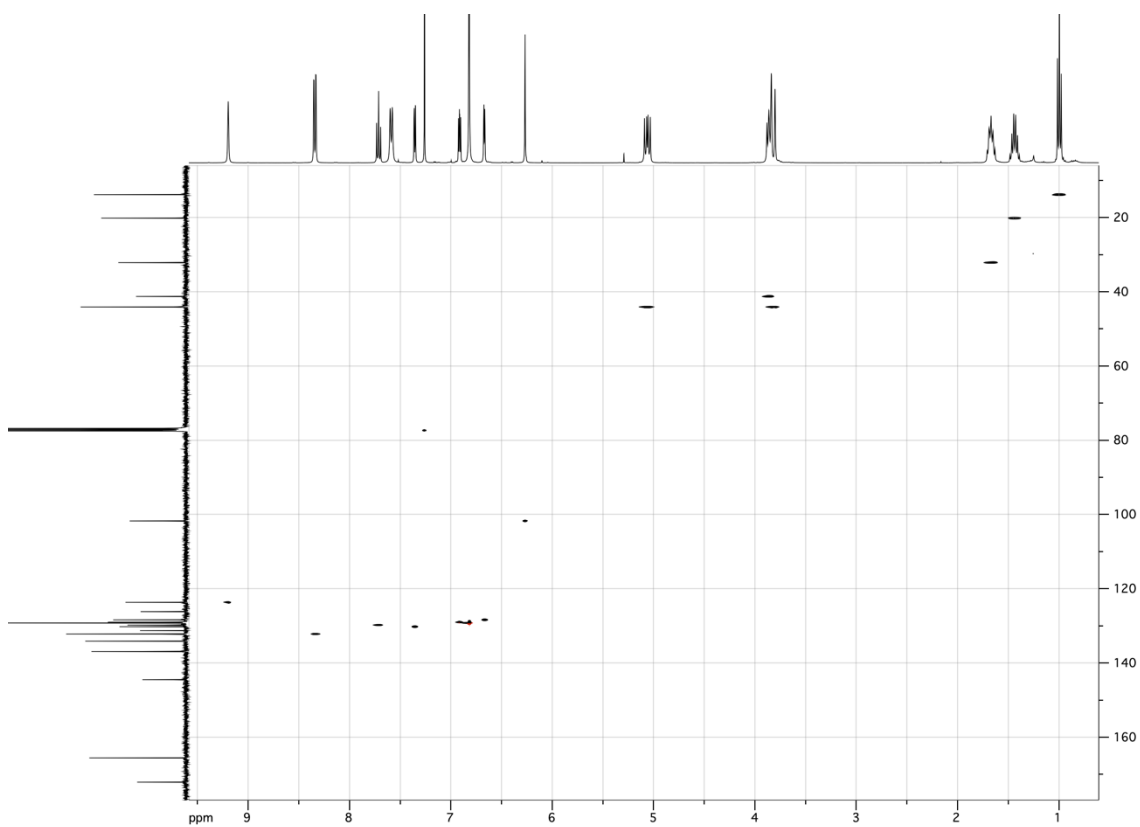

Rotaxane **3c** (DOSY 2D, 600 MHz, CDCl<sub>3</sub>, 298 K).

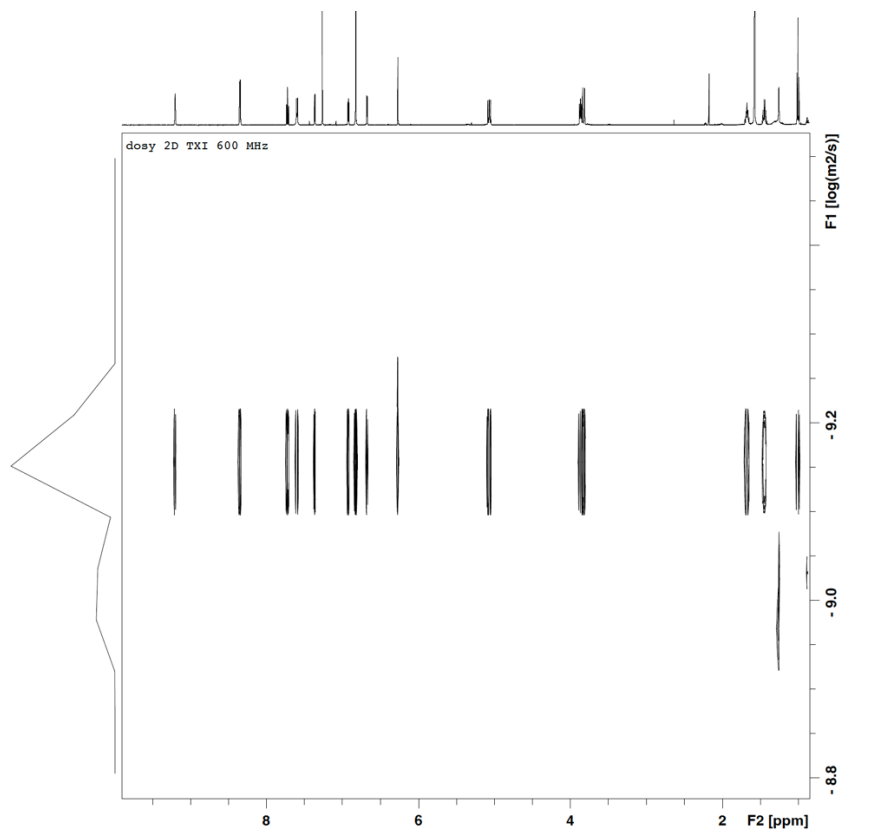

Rotaxane **3d** ( $^1\text{H}$  NMR, 400 MHz,  $\text{CDCl}_3$ , 298 K)

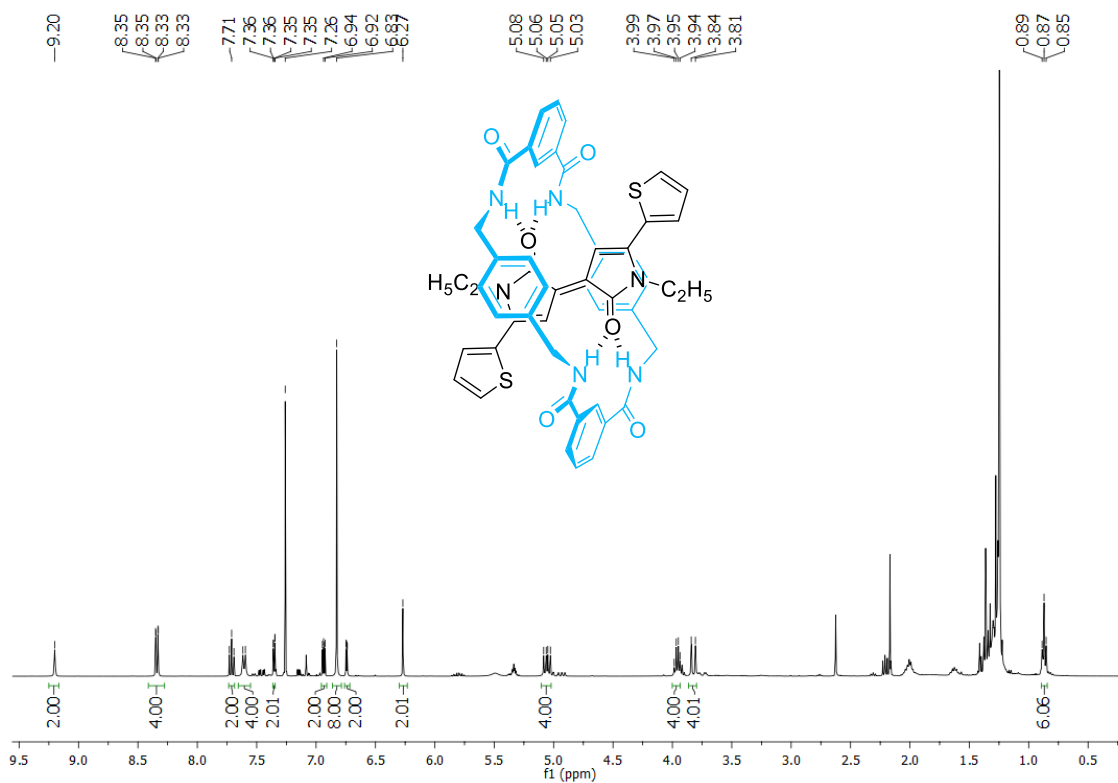

Rotaxane **3d** ( $^{13}\text{C}$  NMR, 100 MHz,  $\text{CDCl}_3$ , 298 K)

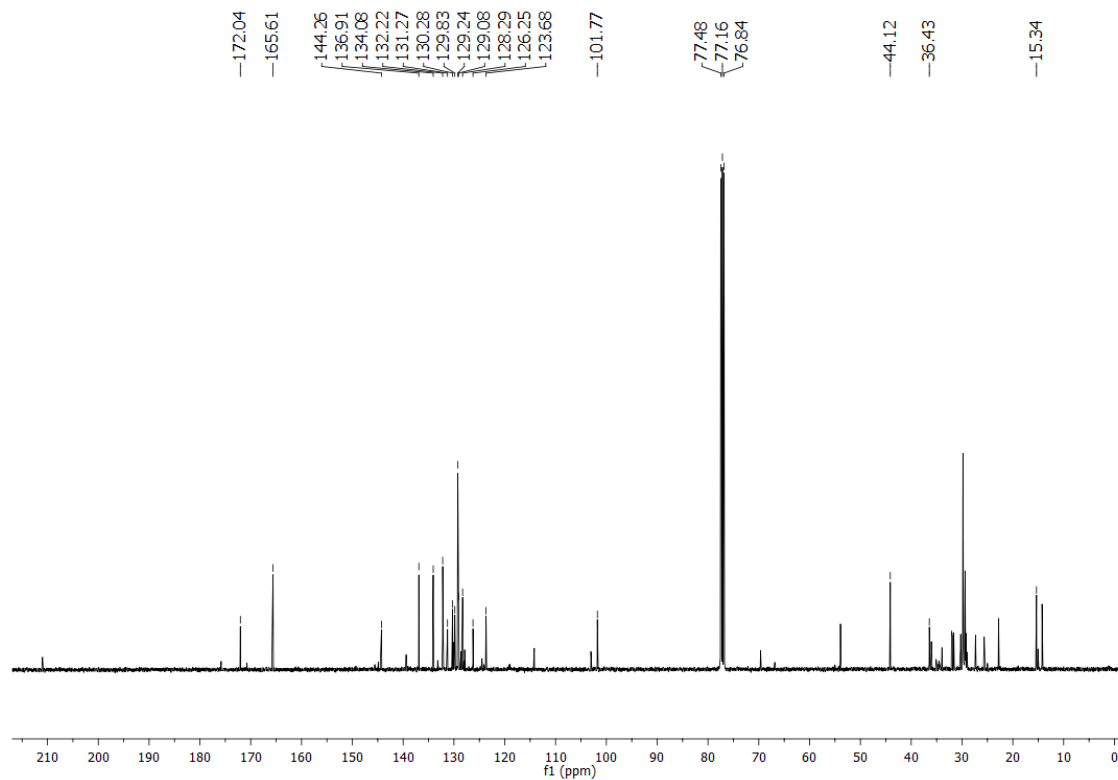

Rotaxane **3e** ( $^1\text{H}$  NMR, 600 MHz,  $\text{CDCl}_3$ , 298 K)

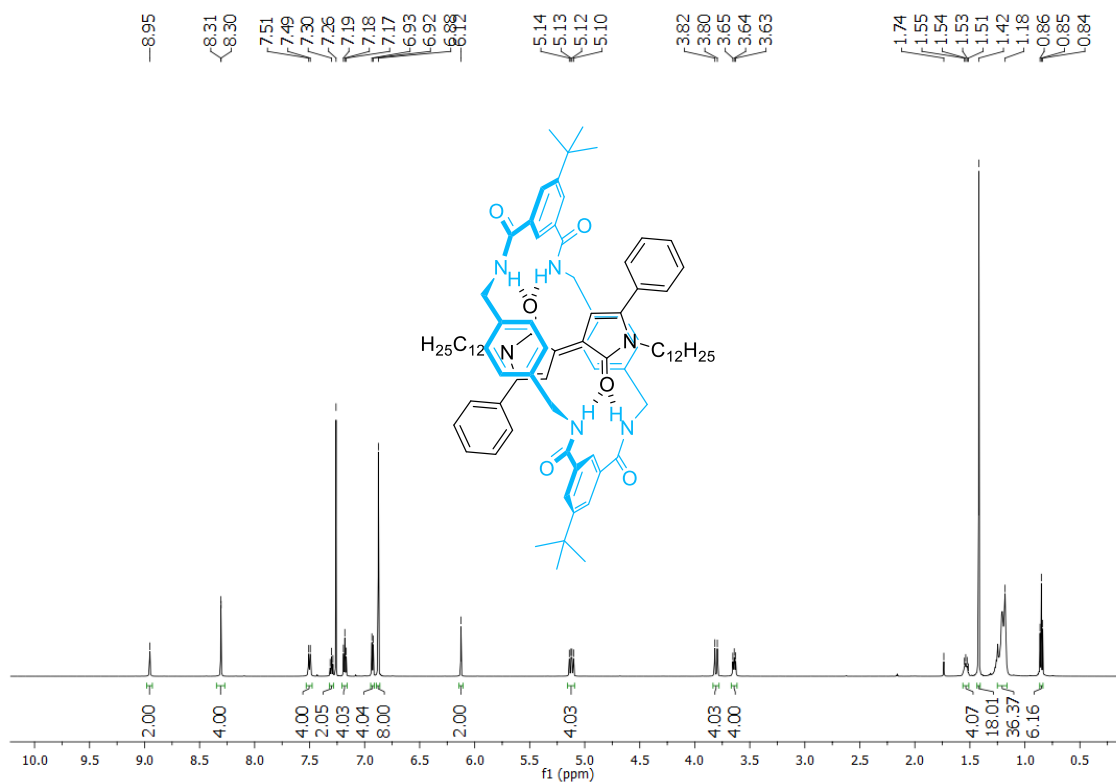

Rotaxane **3e** ( $^{13}\text{C}$  RMN, 150 MHz,  $\text{CDCl}_3$ , 298 K)

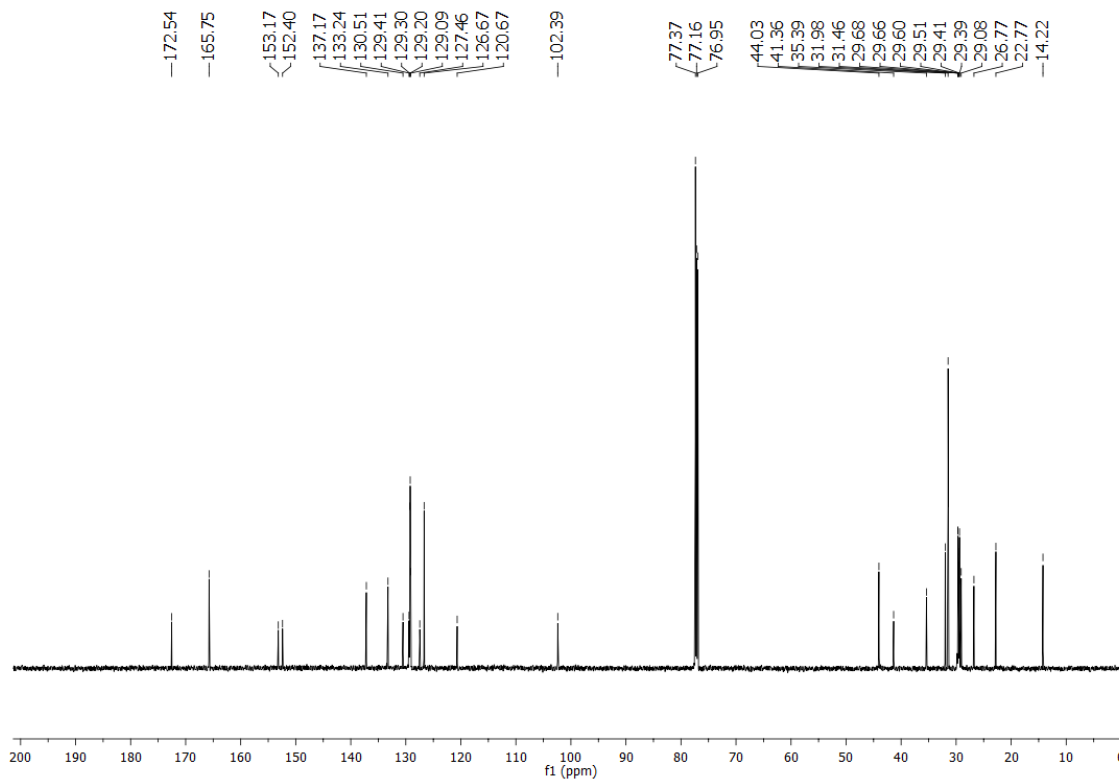

Rotaxane **3e** ( $^1\text{H}, ^1\text{H}$ -COSY, 600 MHz,  $\text{CDCl}_3$ , 298 K)

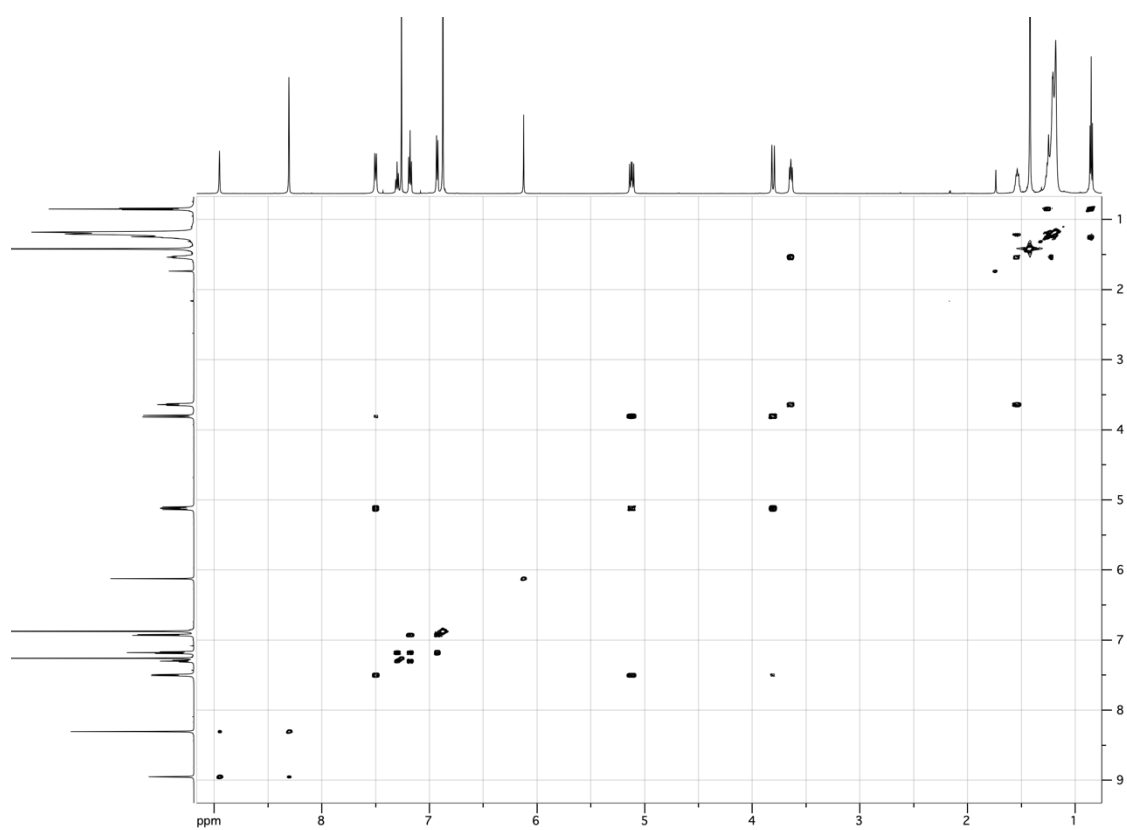

Rotaxane **3e** (HSQC, 600 MHz,  $\text{CDCl}_3$ , 298 K)

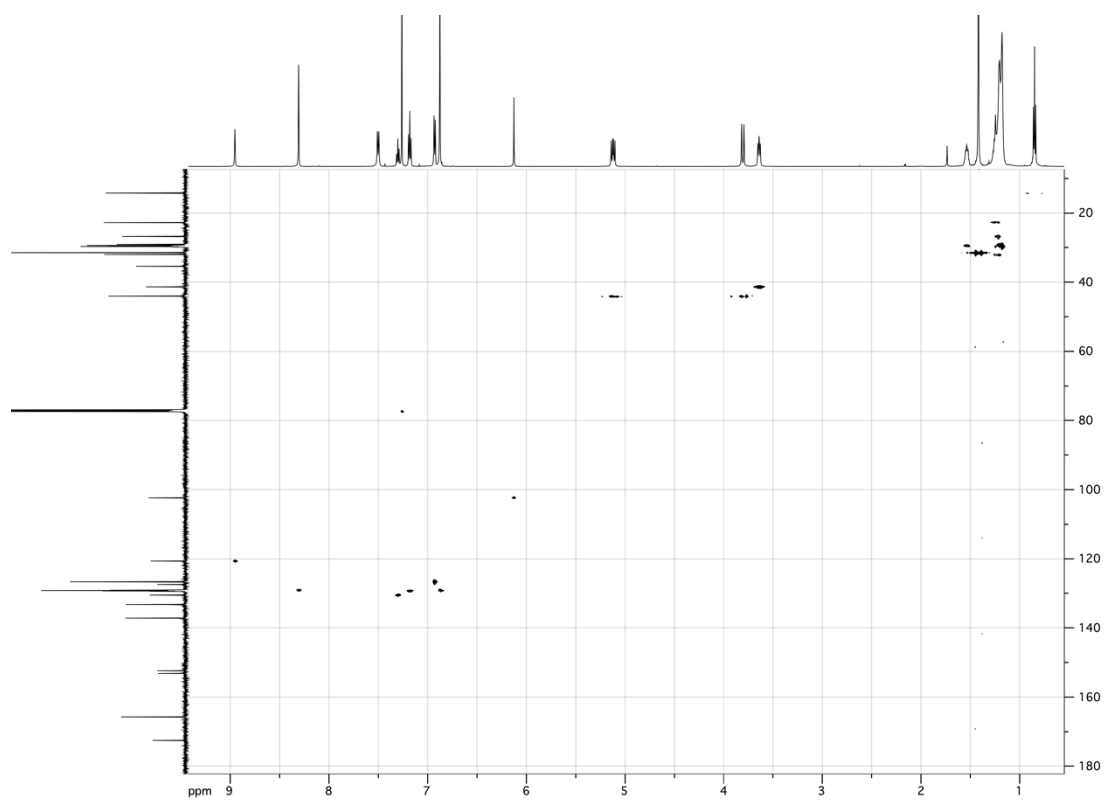

Rotaxane **3f** ( $^1\text{H}$  NMR, 400 MHz,  $\text{CDCl}_3$ , 298 K)

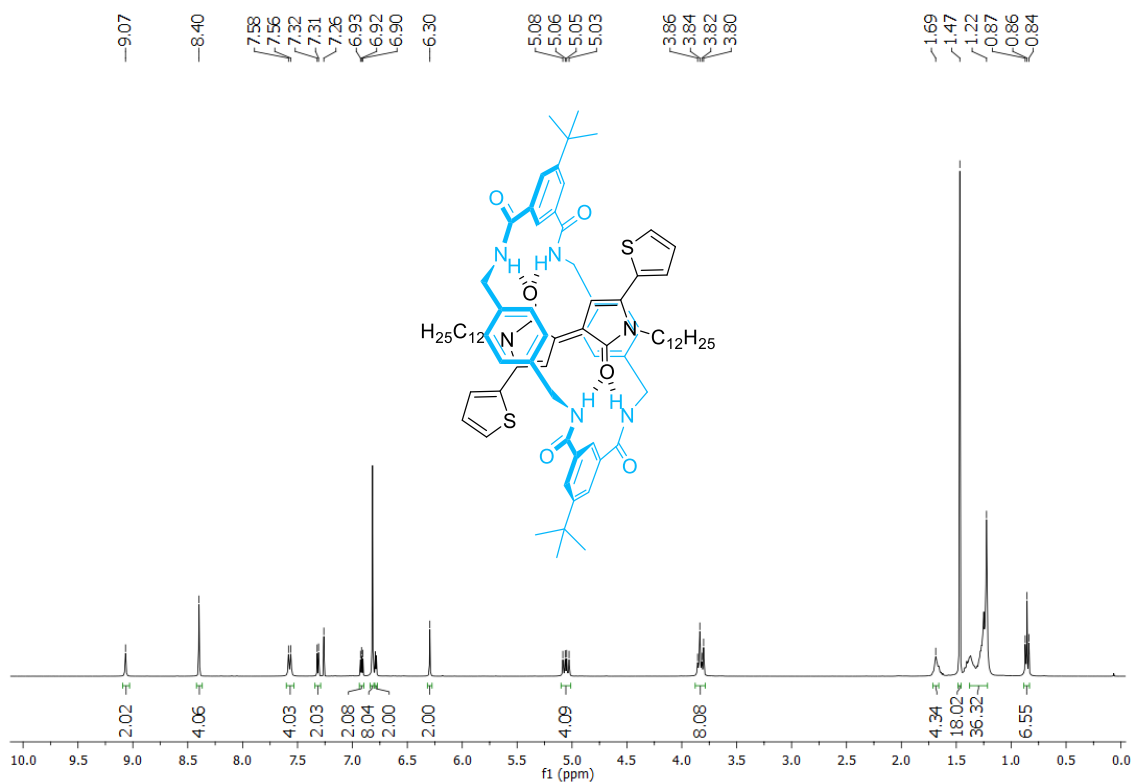

Rotaxane **3f** ( $^{13}\text{C}$  RMN, 100 MHz,  $\text{CDCl}_3$ , 298 K)

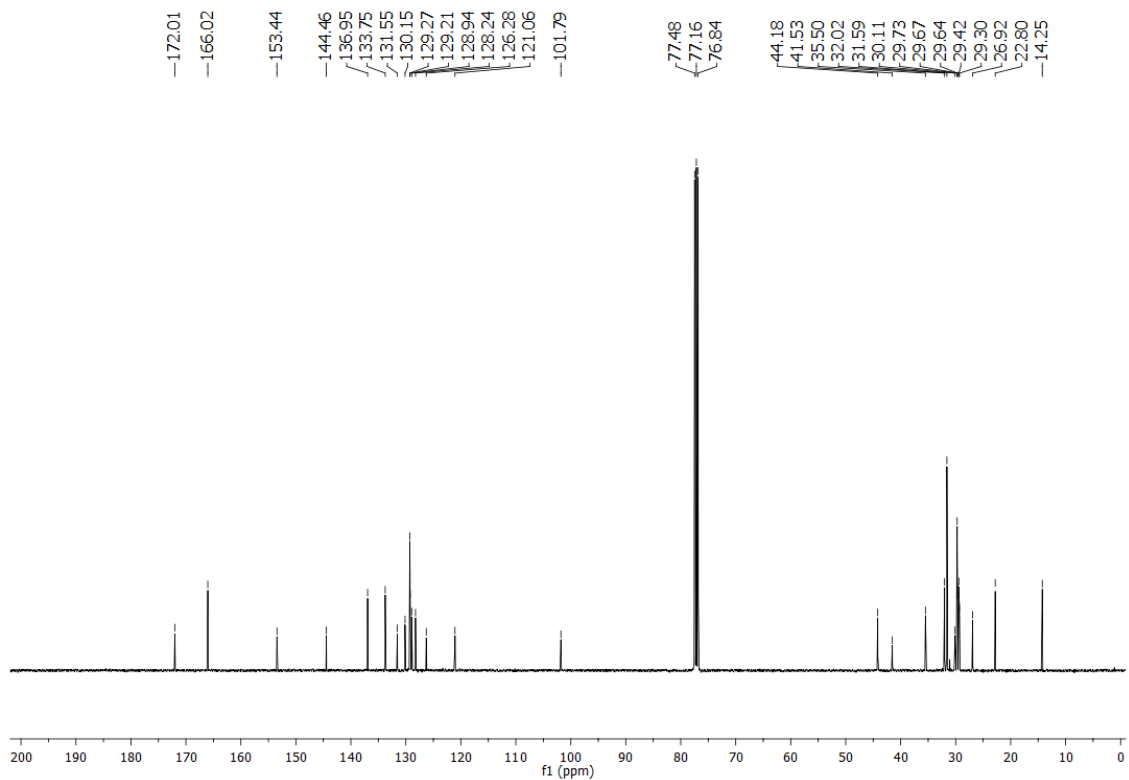

Rotaxane **3f** ( $^1\text{H}$ ,  $^1\text{H}$ -COSY, 400 MHz,  $\text{CDCl}_3$ , 298 K)

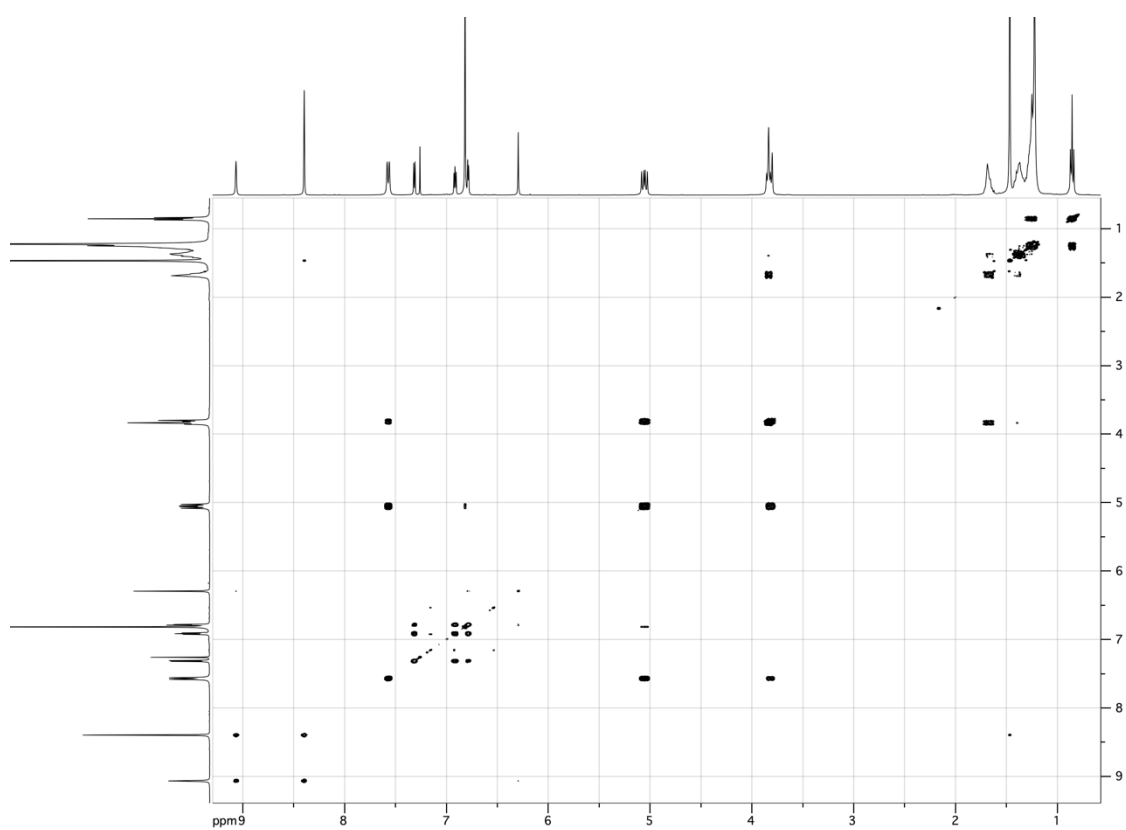

Rotaxane **3f** (HSQC, 400 MHz,  $\text{CDCl}_3$ , 298 K)

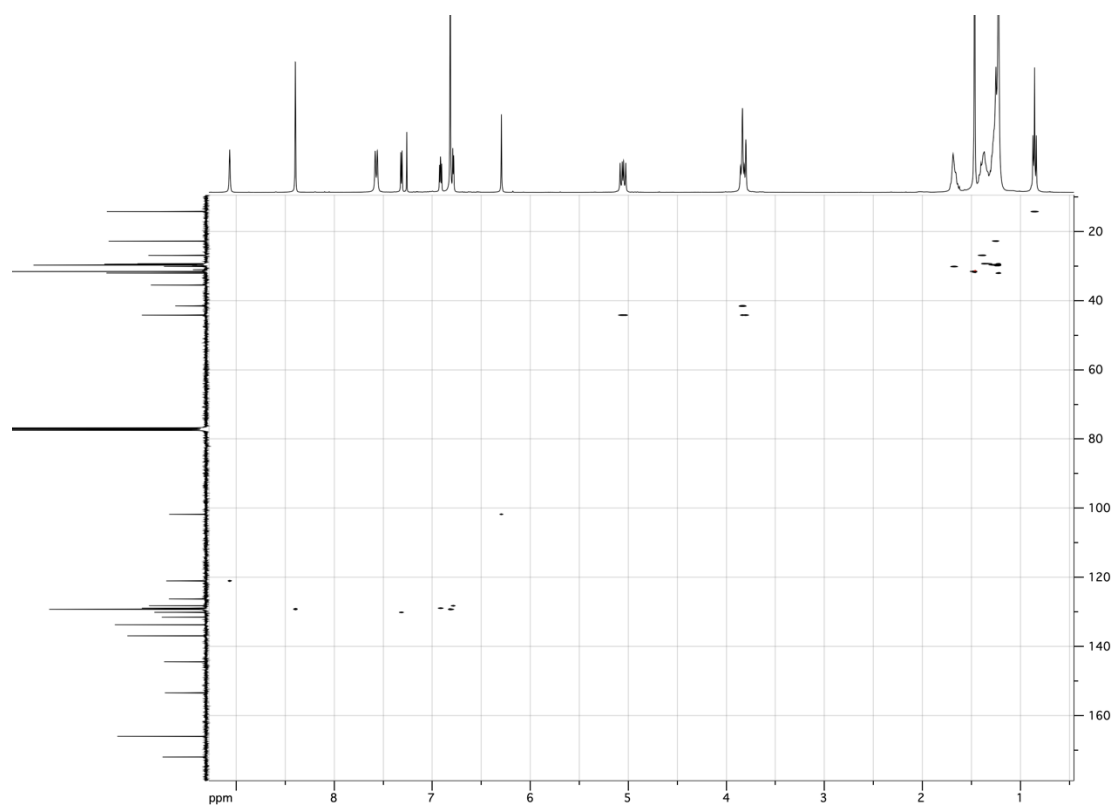

Rotaxane **3g** ( $^1\text{H}$  NMR, 400 MHz,  $\text{CDCl}_3$ , 298 K)

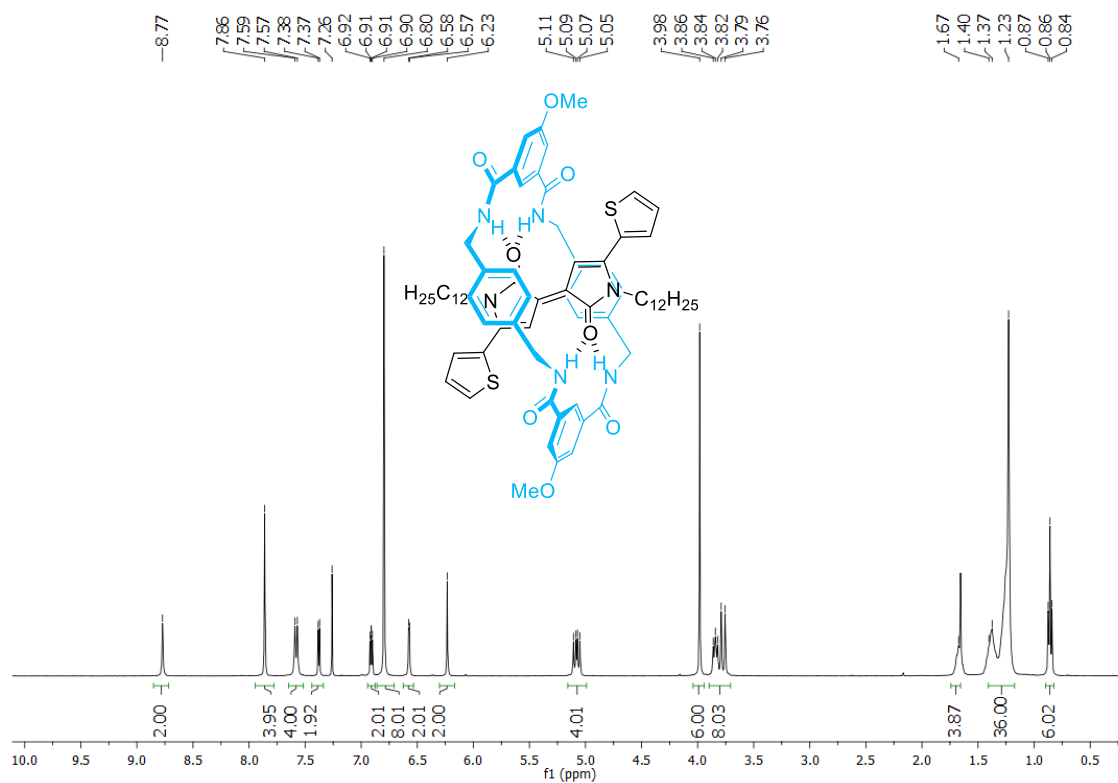

Rotaxane **3g** ( $^{13}\text{C}$  RMN, 100 MHz,  $\text{CDCl}_3$ , 298 K)

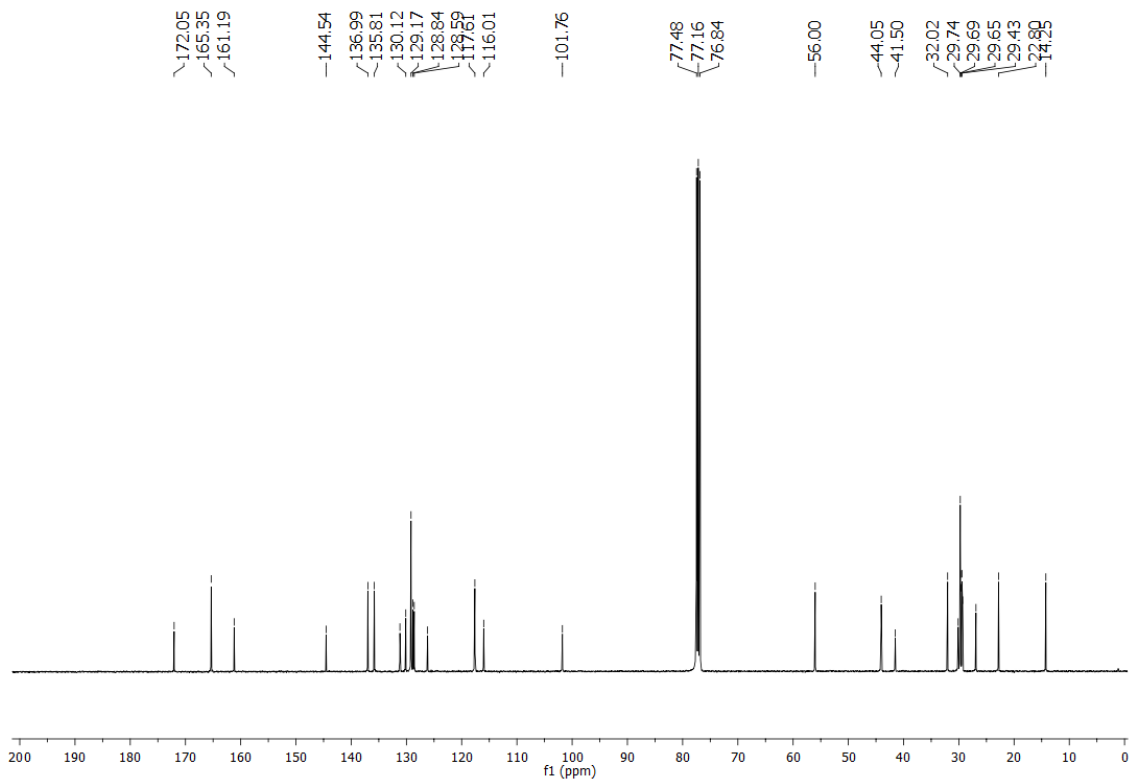



Rotaxane **3h** ( $^1\text{H}$  NMR, 400 MHz,  $\text{CDCl}_3$ , 298 K)

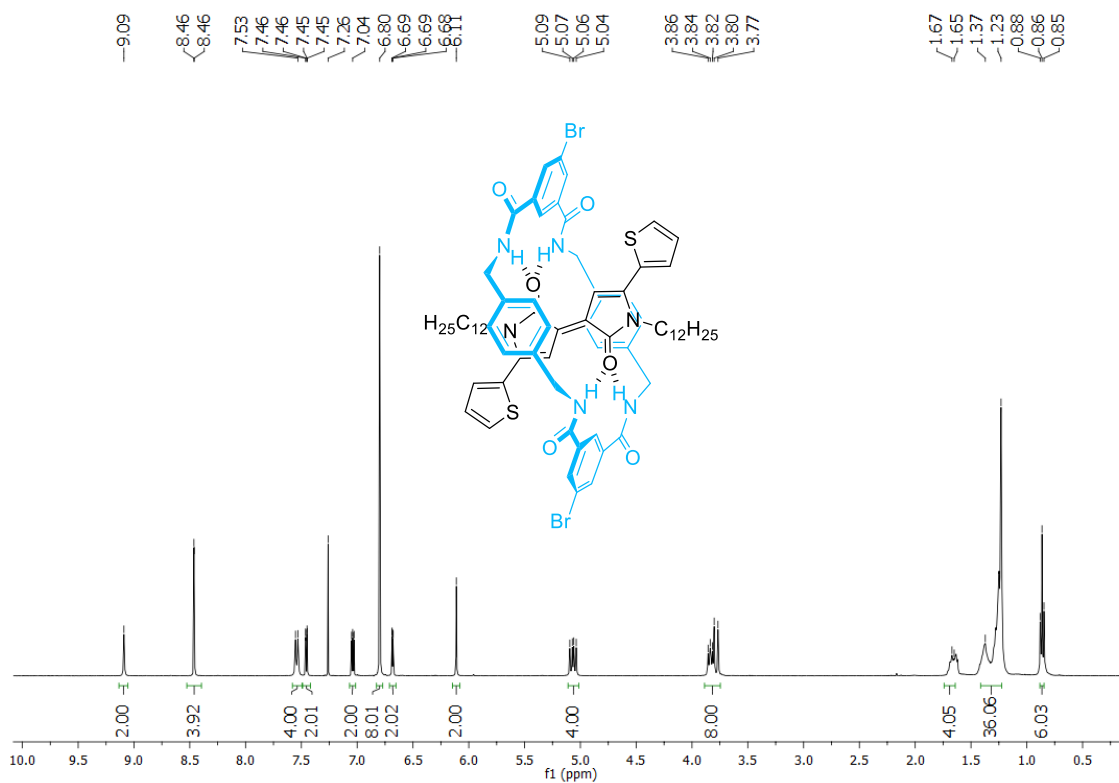

Rotaxane **3h** ( $^{13}\text{C}$  RMN, 100 MHz,  $\text{CDCl}_3$ , 298 K)

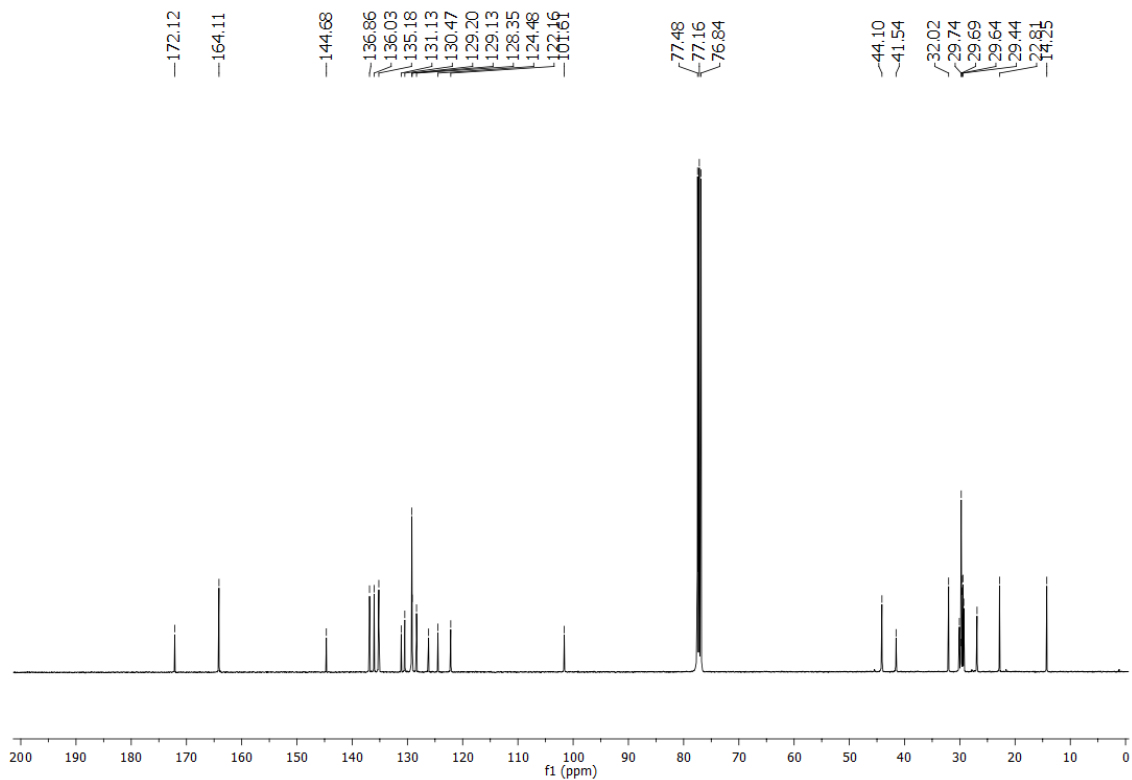

Rotaxane **3h** ( $^1\text{H}, ^1\text{H}$ -COSY, 400 MHz,  $\text{CDCl}_3$ , 298 K)

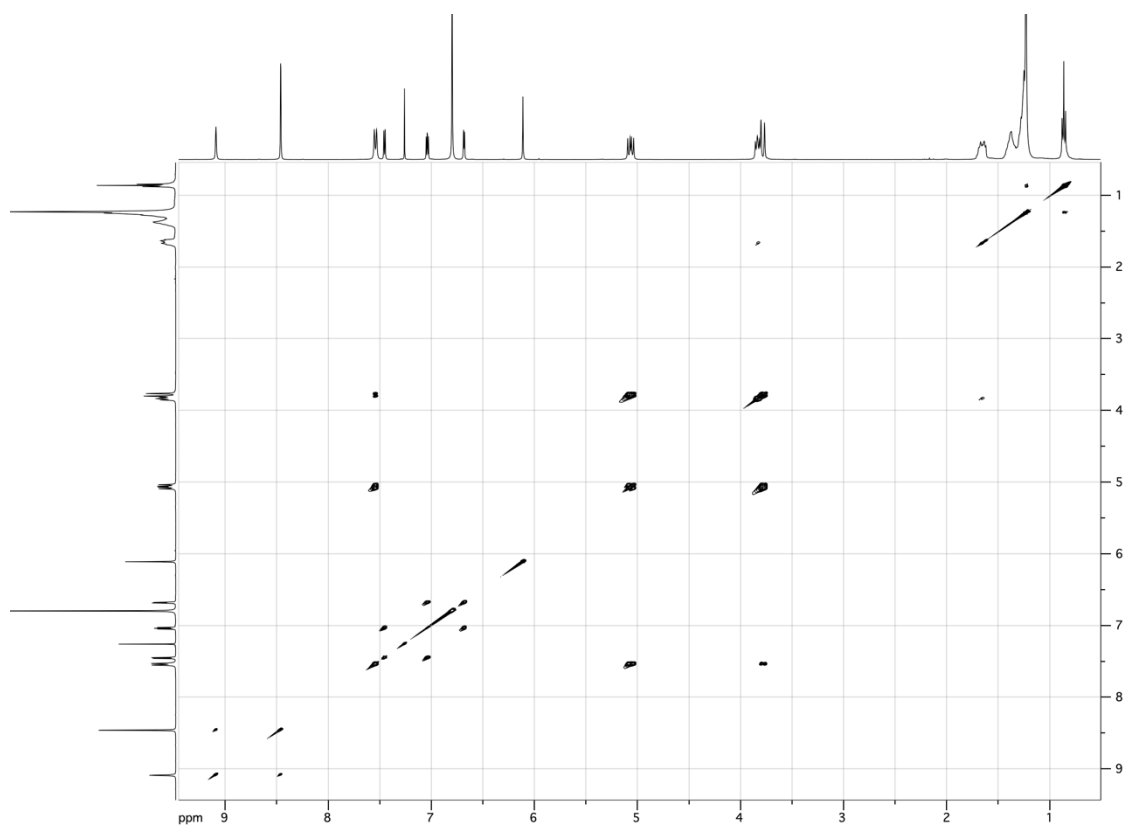

Rotaxane **3h** (HSQC, 400 MHz,  $\text{CDCl}_3$ , 298 K)

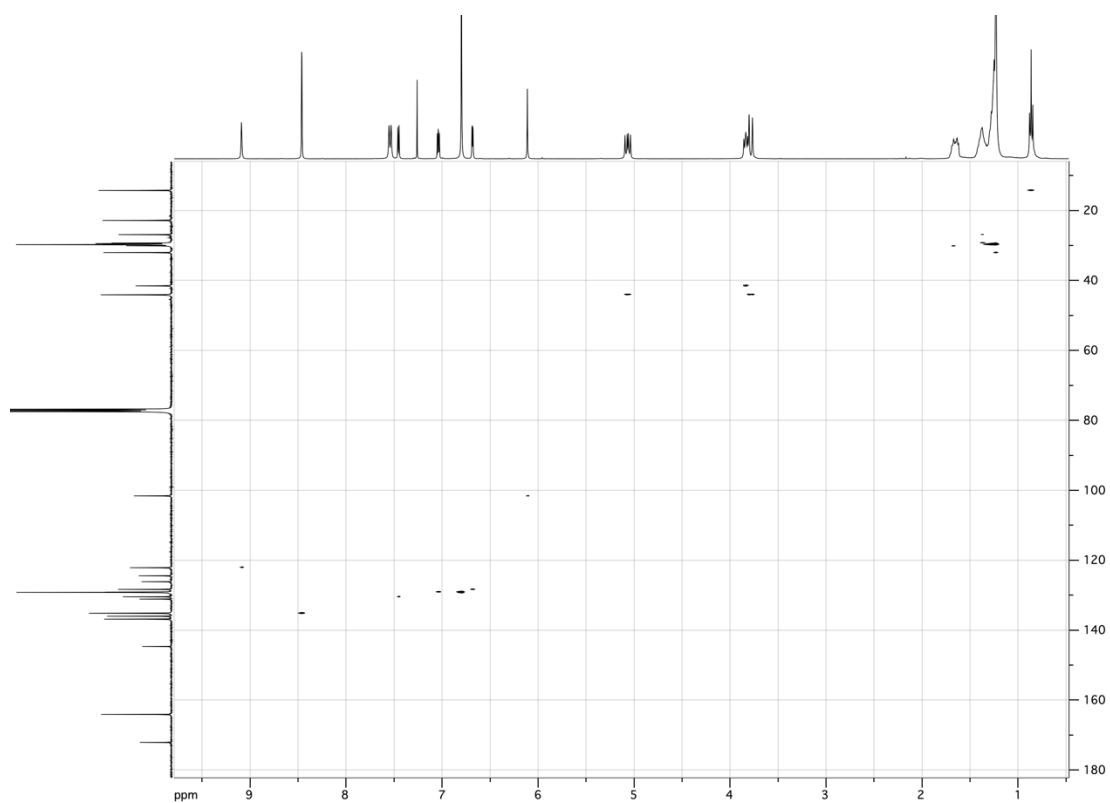

Rotaxane **3i** ( $^1\text{H}$  NMR, 400 MHz,  $\text{CDCl}_3$ , 298 K)

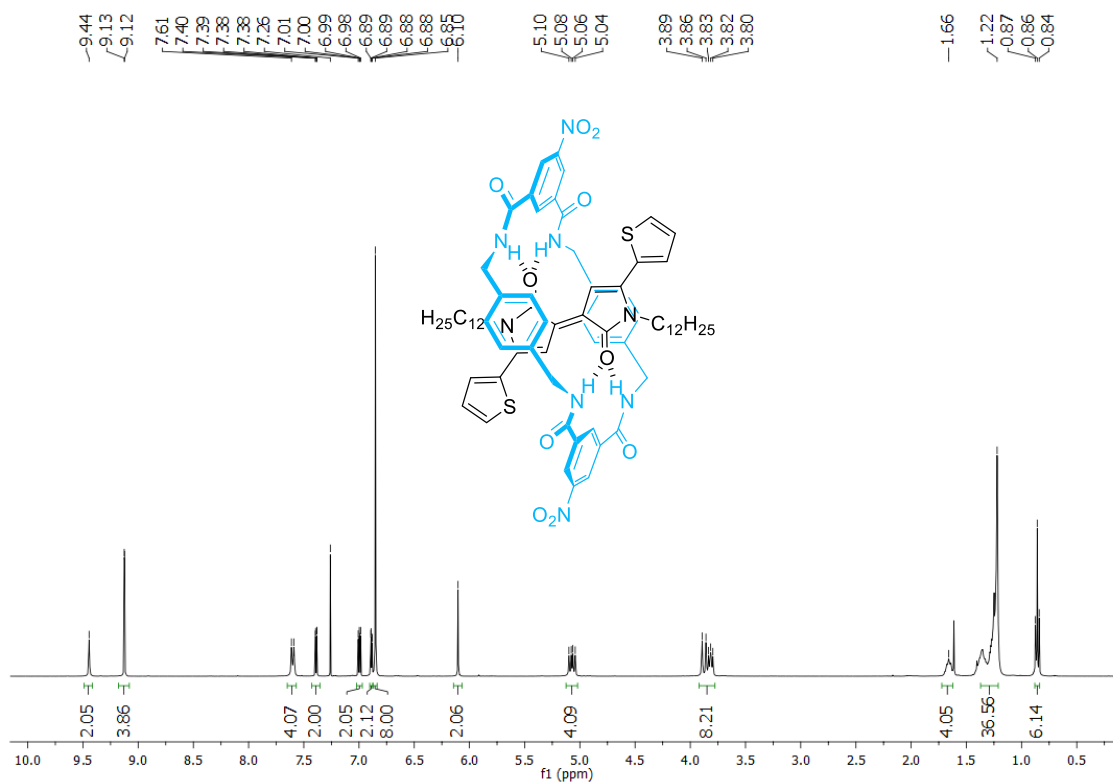

Rotaxane **3i** ( $^{13}\text{C}$  RMN, 100 MHz,  $\text{CDCl}_3$ , 298 K)

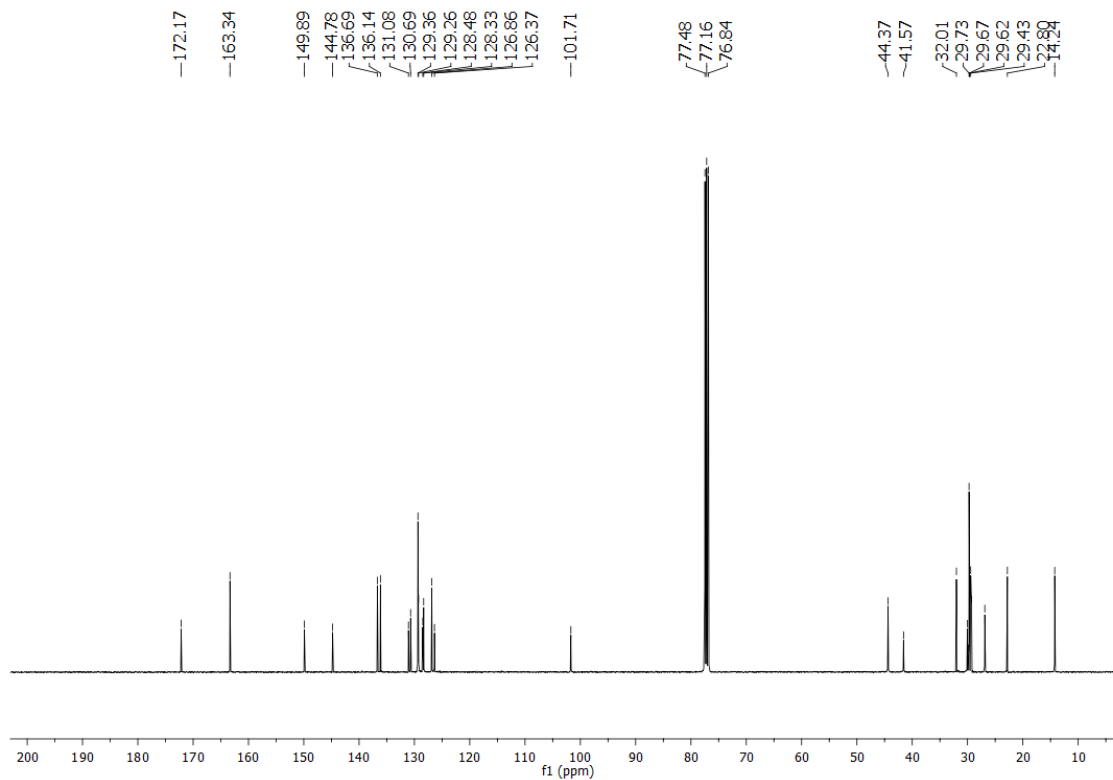

*N*-Dodecyl-*N*-formylthiophene-2-carboxamide (**4**) ( $^1\text{H}$  NMR, 400 MHz,  $\text{CDCl}_3$ , 298 K)

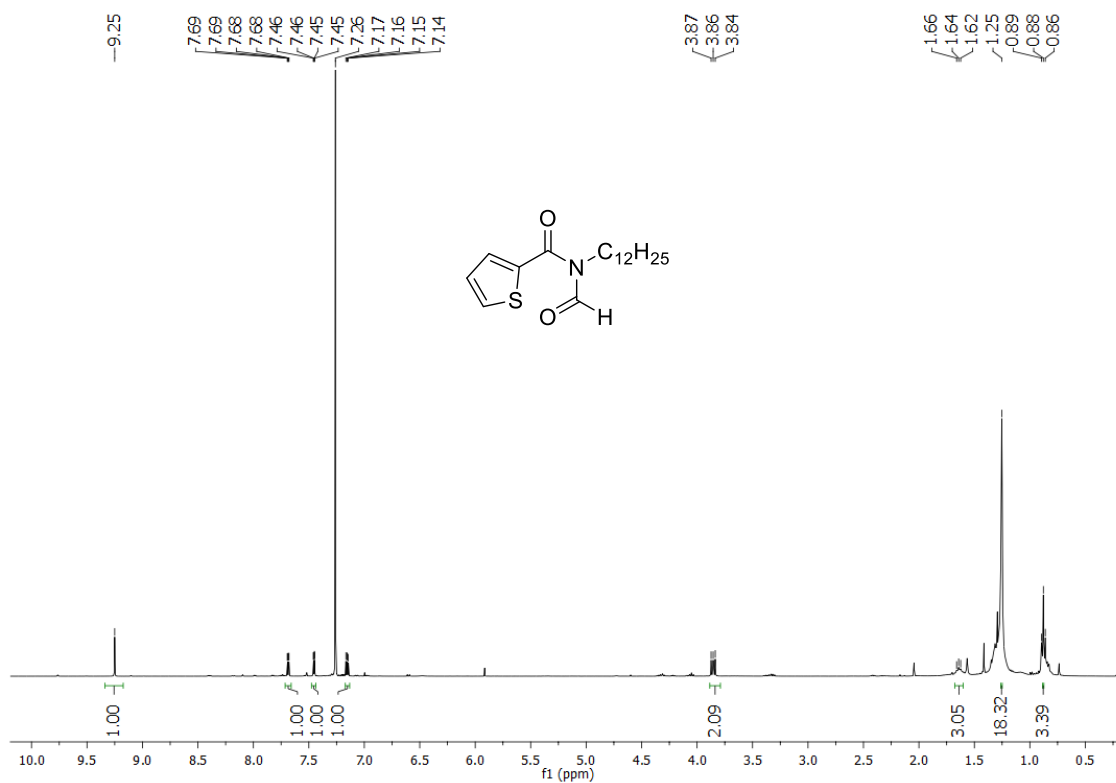

*N*-Dodecyl-*N*-formylthiophene-2-carboxamide (**4**) ( $^{13}\text{C}$  RMN, 100 MHz,  $\text{CDCl}_3$ , 298 K)

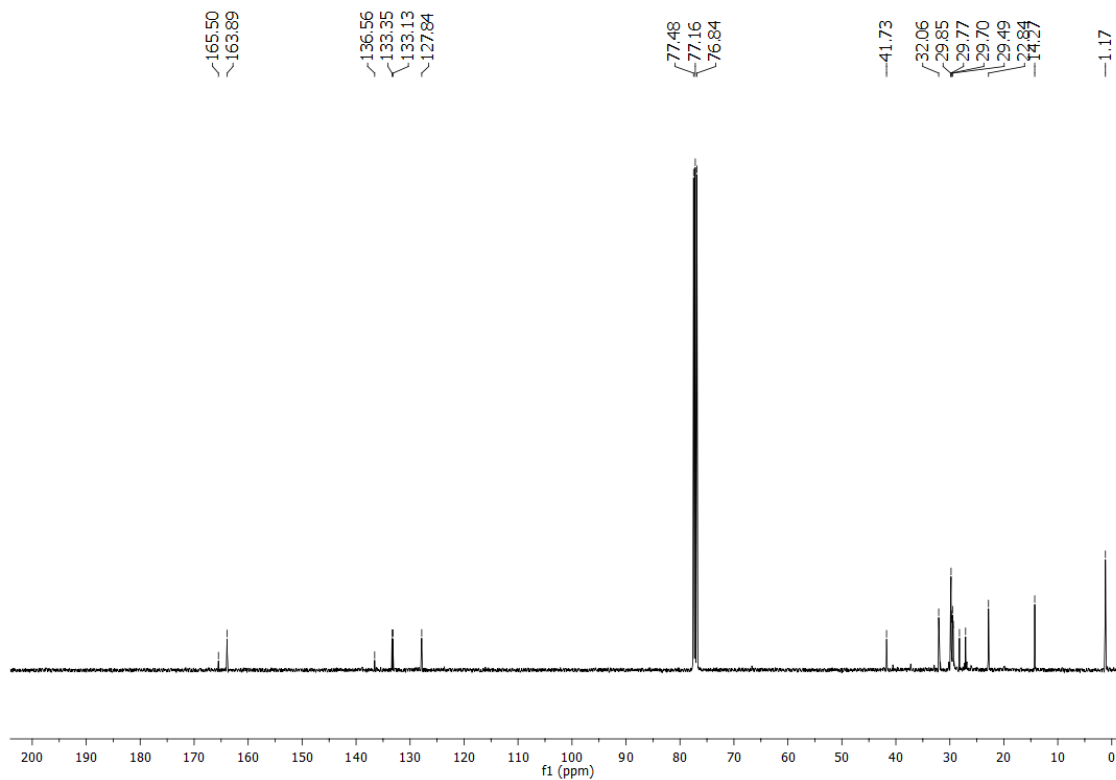

*N*-Dodecyl-*N*-formylthiophene-2-carboxamide (**4**) ( $^1\text{H}, ^1\text{H}$ -COSY, 400 MHz,  $\text{CDCl}_3$ , 298 K)

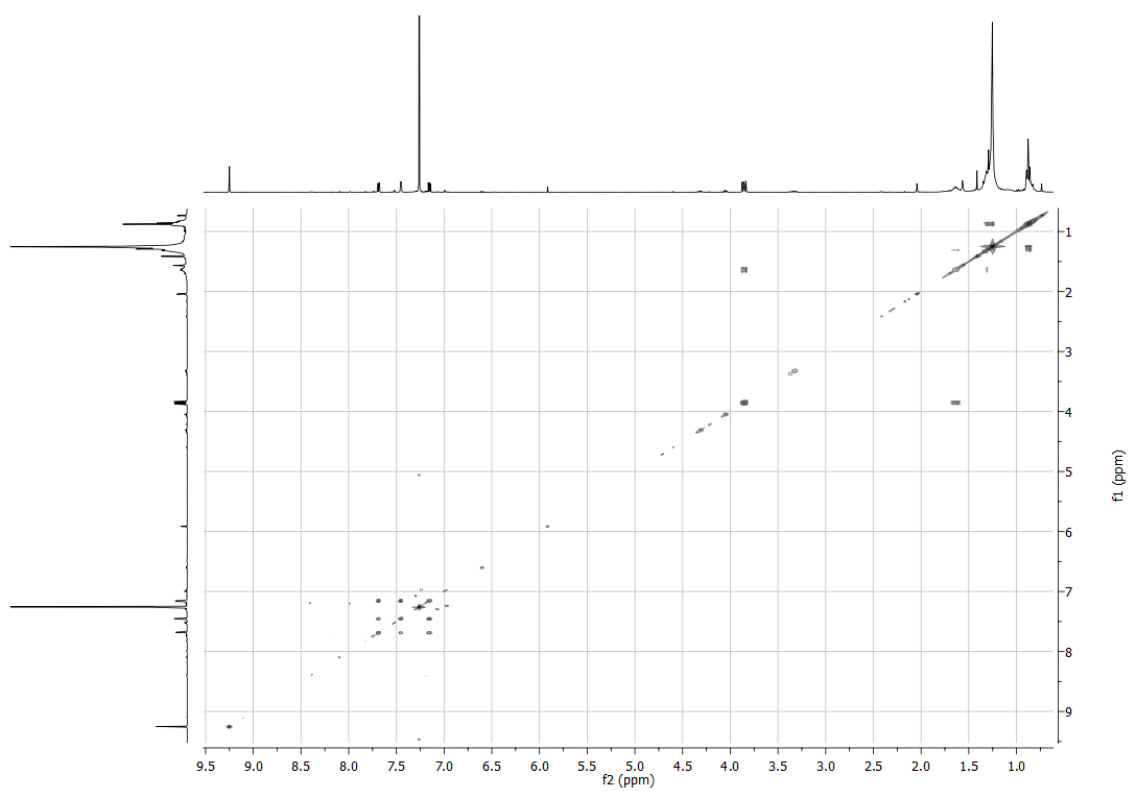

*N*-Dodecyl-*N*-formylthiophene-2-carboxamide (**4**) (HSQC, 400 MHz,  $\text{CDCl}_3$ , 298 K)

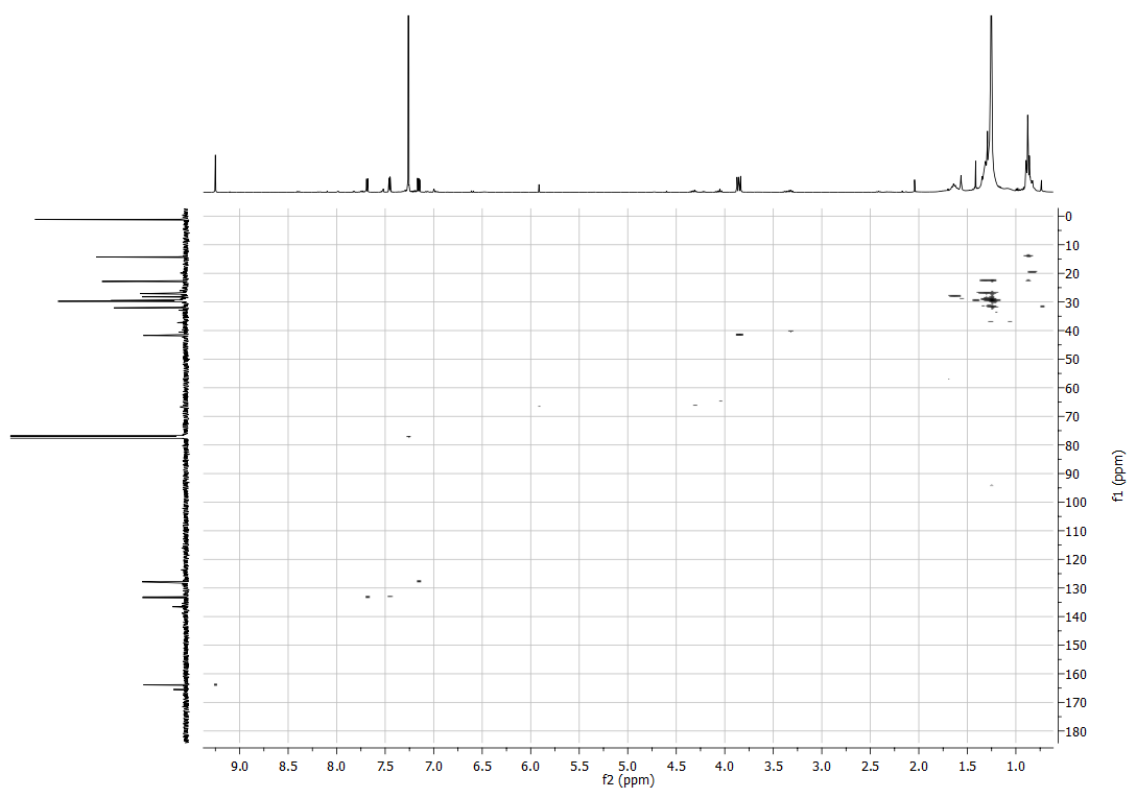

*N*-Dodecyl-*N*-formylthiophene-2-carboxamide (**4**) (HMBC, 400 MHz, CDCl<sub>3</sub>, 298 K)

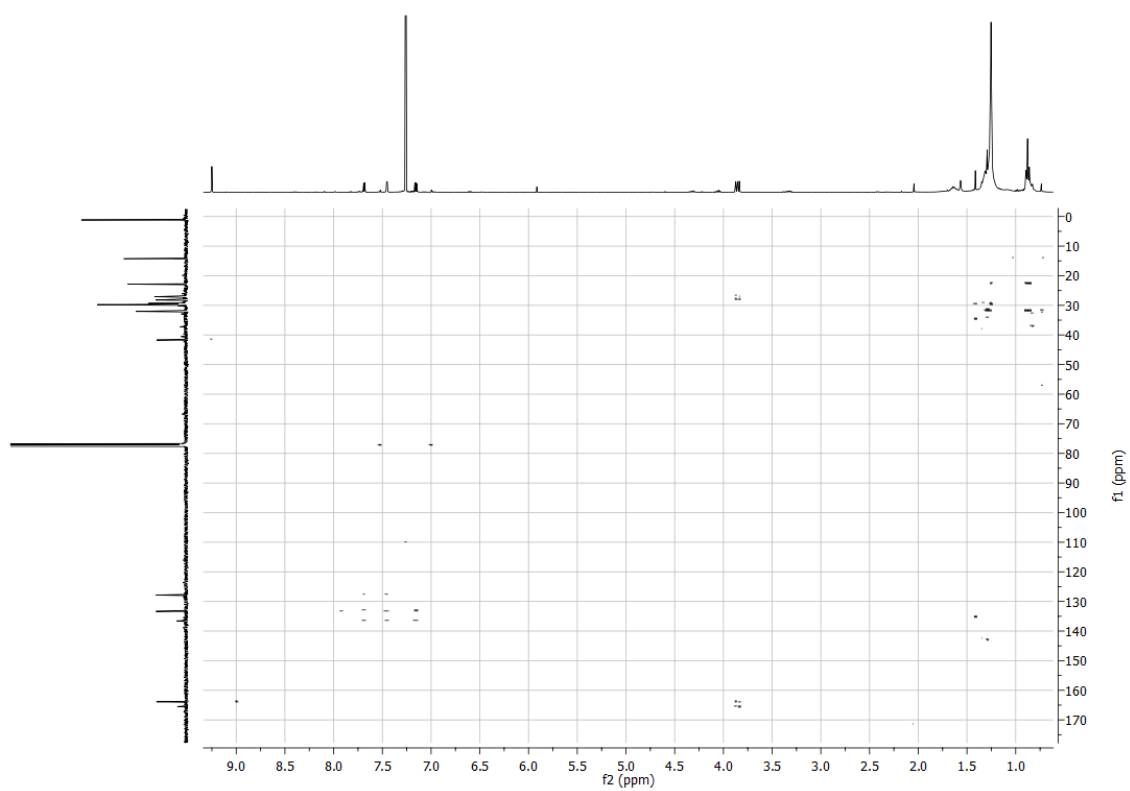

*N*-Dodecylthiophene-2-carboxamide (**5**) ( $^1\text{H}$  NMR, 400 MHz,  $\text{CDCl}_3$ , 298 K)

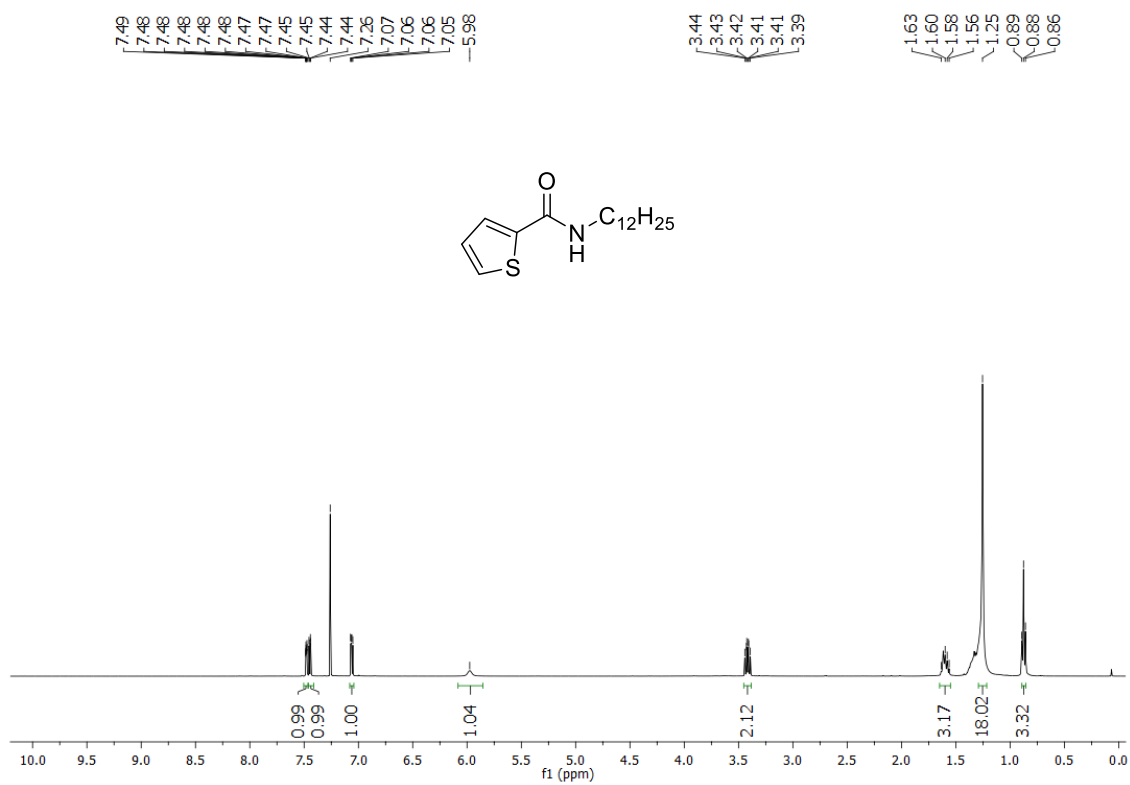

*N*-Dodecylthiophene-2-carboxamide (**5**) ( $^{13}\text{C}$  RMN, 75 MHz,  $\text{CDCl}_3$ , 298 K)

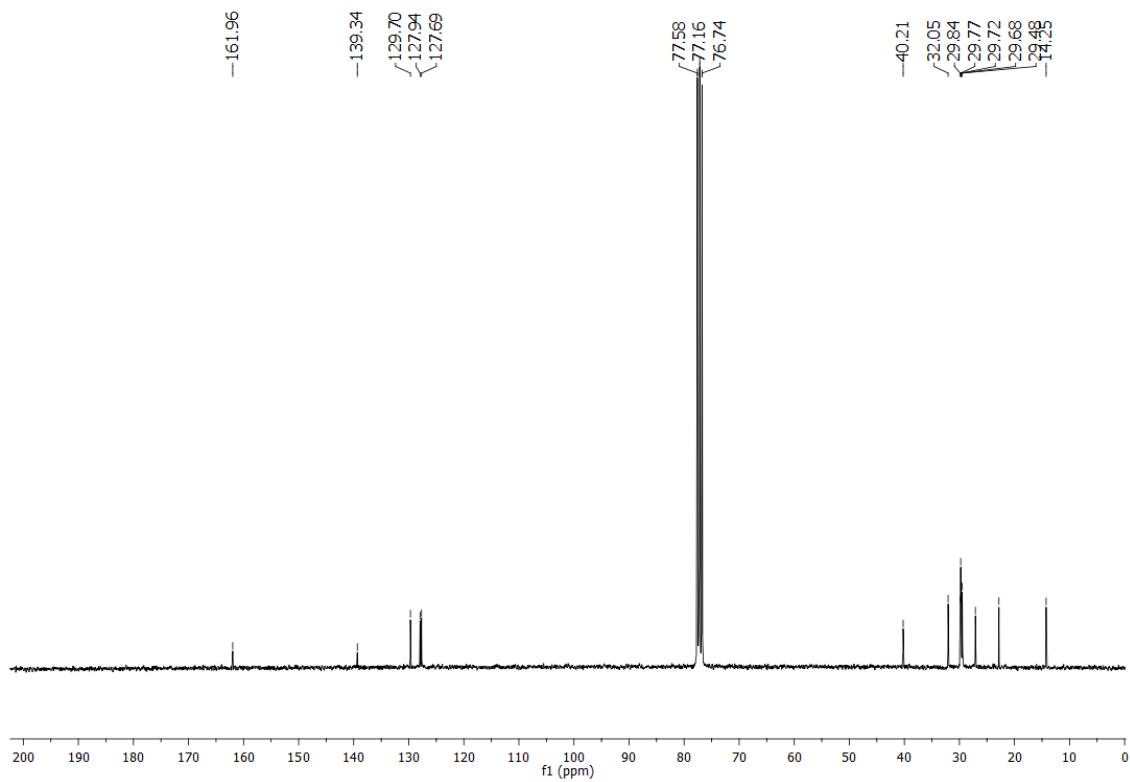

*N*-Dodecylthiophene-2-carboxamide (**5**) ( $^1\text{H}$ ,  $^1\text{H}$ -COSY, 400 MHz,  $\text{CDCl}_3$ , 298 K)

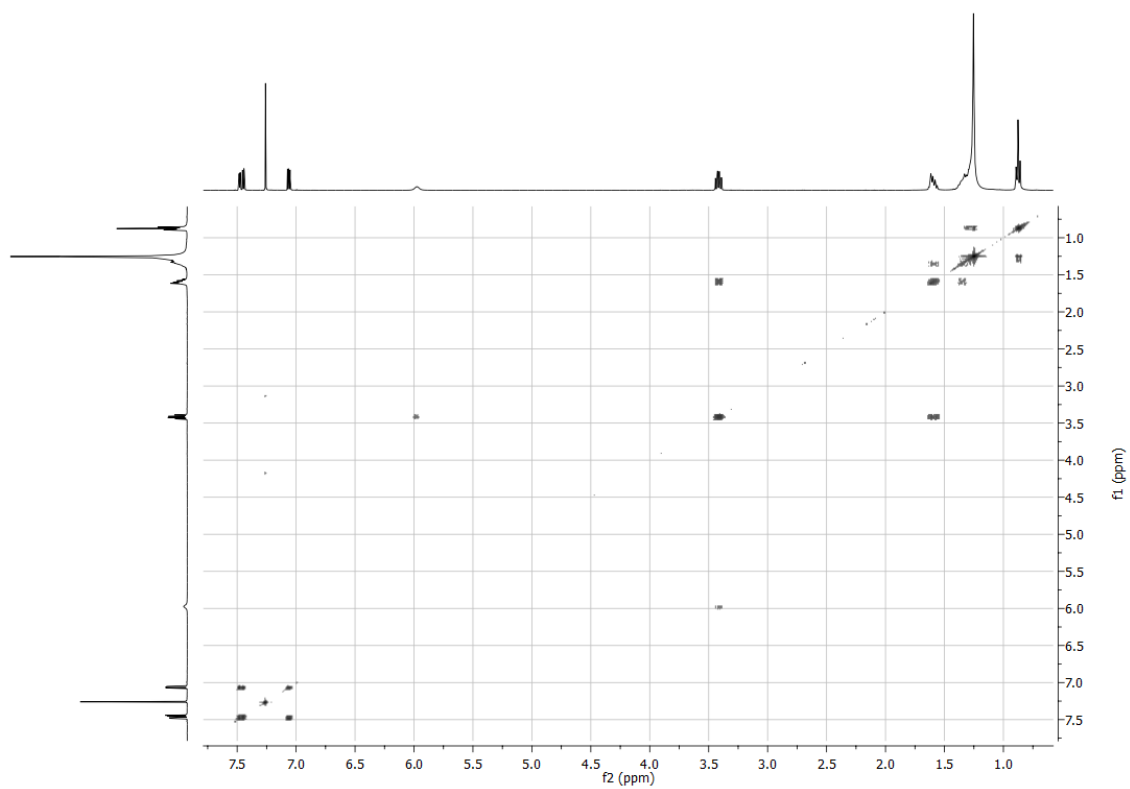

*N*-Dodecylthiophene-2-carboxamide (**5**) (HMBC, 400 MHz,  $\text{CDCl}_3$ , 298 K)

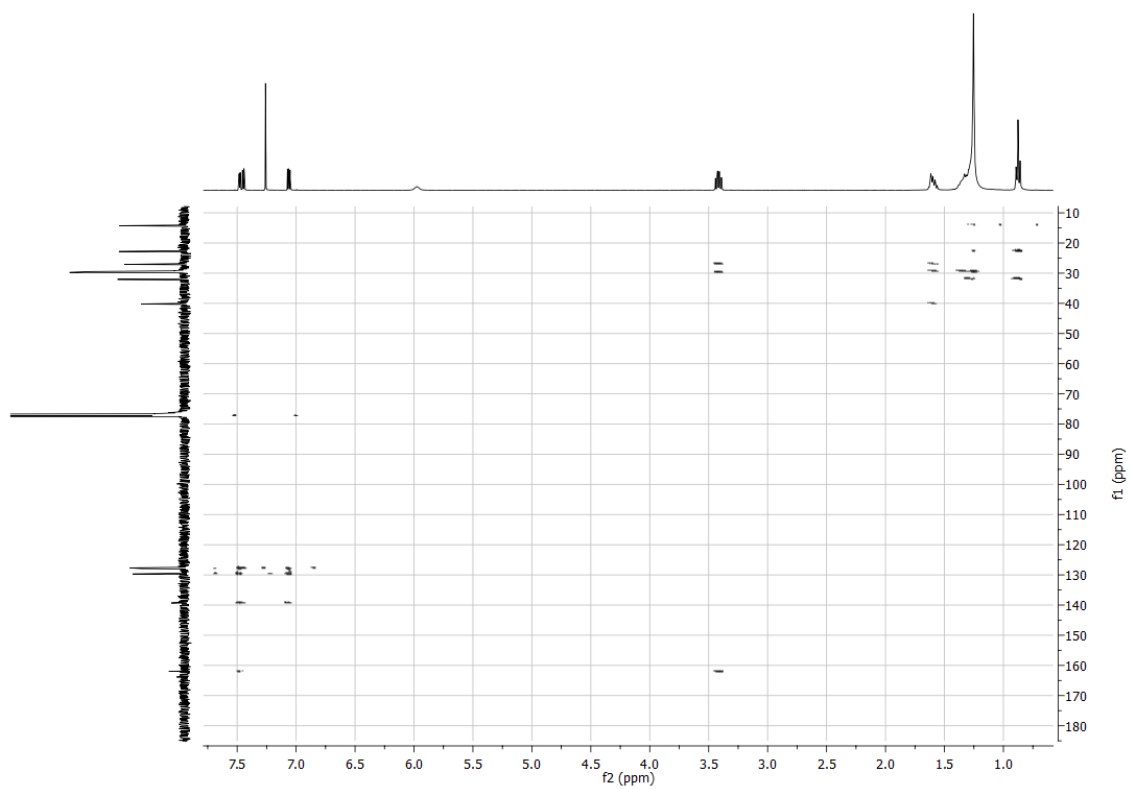



## 12. References

1. J. A. Riddick, W. B. Bunger and T. K. Sakano, *Organic Solvents. Physical Properties and Methods of Purification*, John Wiley, New York, 4th edn., 1986.
2. J. T. Edward, Molecular volumes and the Stokes-Einstein equation, *J. Chem. Educ.*, 1970, **47**, 261.
3. T. B. Norsten, E. A. B. Kantchev and M. B. Sullivan, Thiophene-Containing Pechmann Dye Derivatives, *Org. Lett.*, 2010, **12**, 4816-4819.
4. W.-W. Zhao and Y.-K. Liu, Enantio- and Diastereoselective Synthesis of Tetrahydrofuro[2,3-*b*]furan-2(3*H*)-one Derivatives and Related Oxygen Heterocycles via an Asymmetric Organocatalytic Cascade Process, *Org. Chem. Front.*, 2017, **4**, 2358-2363.
5. E. A. B. Kantchev, T. B. Norsten, M. L. Y. Tan, J. J. Y. Ng and M. B. Sullivan, Thiophene-Containing Pechmann Dyes and Related Compounds: Synthesis, and Experimental and DFT Characterisation, *Chem. Eur. J.*, 2012, **18**, 695-708.
6. O. V. Dolomanov, L. J. Bourhis, R. J. Gildea, J. A. K. Howard and H. Puschmann, OLEX2: A Complete Structure Solution, Refinement and Analysis Program, *J. Appl. Cryst.*, 2009, **42**, 339-341.
7. A. Altomare, C. Cascarano, A. Giacovazzo and J. Guagliardi, Completion and Refinement of Crystal Structures with SIR92, *J. Appl. Cryst.*, 1993, **26**, 343-350.
8. F2 SHELXL-2014/7: Program for the Solution of Crystal Structures; University of Göttingen: Göttingen, Germany, 2014.
9. G. M. Sheldrick, Crystal Structure Refinement with SHELXL, *Acta Cryst.*, 2015, **C71**, 3-8.
10. F. P. Gasparro and N. H. Kolodny, NMR determination of the rotational barrier in N,N-dimethylacetamide. A physical chemistry experiment, *J. Chem. Educ.*, 1977, **54**, 258.
11. M. Oki, *Applications of Dynamic NMR Spectroscopy to Organic Chemistry*, VCH Verlag GmbH, Weinheim, 1982.
12. J. Sandström, *Dynamic NMR spectroscopy*, Academic Press, New York, 1982.
13. H. Günther, *NMR Spectroscopy: Basic Principles, Concepts, and Applications in Chemistry*, Wiley, New York, 1995.
14. Changing the eluent to 50:1 chloroform/methanol we were able to get other fractions but the <sup>1</sup>H-NMR showed that they were complex mixtures of products.

15. Y. Zhao and D. G. Truhlar, The M06 Suite of Density Functionals for Main Group Thermochemistry, Thermochemical Kinetics, Noncovalent Interactions, Excited States, and Transition Elements: Two New Functionals and Systematic Testing of Four M06-Class Functionals and 12 Other Functionals, *Theor. Chem. Acc.*, 2008, **120**, 215-241.
16. N. Godbout, D. R. Salahub, J. Andzelm and E. Wimmer, Optimization of Gaussian-Type Basis Sets for Local Spin Density Functional Calculations. Part I. Boron Through Neon, Optimization Technique and Validation, *Can. J. Chem.*, 1992, **70**, 560-571.
17. R. Bauernschmitt and R. Ahlrichs, Stability Analysis for Solutions of The Closed Shell Kohn–Sham Equation, *J. Phys. Chem.*, 1996, **104**, 9047-9052.
18. A. V. Marenich, C. J. Cramer and D. G. Truhlar, Universal Solvation Model Based on Solute Electron Density and on a Continuum Model of the Solvent Defined by the Bulk Dielectric Constant and Atomic Surface Tensions, *J. Phys. Chem. B*, 2009, **113**, 6378-6396.
19. Gaussian 16. Revision C.01; Gaussian Inc.: Wallingford, CT, 2016.
20. L. Dou, J. Gao, E. Richard, J. You, C.-C. Chen, K. C. Cha, Y. He, G. Li and Y. Yang, Systematic Investigation of Benzodithiophene- and Diketopyrrolopyrrole-Based Low-Bandgap Polymers Designed for Single Junction and Tandem Polymer Solar Cells, *J. Am. Chem. Soc.*, 2012, **134**, 10071-10079.
